# Supplementary material for: Diversity-oriented synthesis of spiro-oxindole-based 2,5-dihydropyrroles via three-component cycloadditions and evaluation on their cytotoxicity
Source: Royal Society of Chemistry journal article supplement (doi:10.1039/c3ra40874d), 2013-01-01

*Supporting Information for*

**Diversity-Oriented Synthesis of Spiro-Oxindole-based  
2,5-Dihydropyrroles via Three-Component Cycloadditions  
and Evaluation on Their Cytotoxicity**

Wei Tan,<sup>a‡</sup> Xiao-Tong Zhu,<sup>b‡</sup> Shu Zhang,<sup>c</sup> Gui-Juan Xing,<sup>a</sup> Ren-Yi Zhu<sup>a</sup>  
and Feng Shi\*<sup>a</sup>

<sup>a</sup>School of Chemistry and Chemical Engineering, Jiangsu Normal University, Xuzhou,  
221116, China. Fax: +86(516) 83403165; Tel: +86(516) 83403165; E-mail:

[fshi@jsnu.edu.cn](mailto:fshi@jsnu.edu.cn)

<sup>b</sup>Department of Chemistry, School of Basic Education Sciences, Xuzhou Medical  
College, Xuzhou, 221004, China

<sup>c</sup>Clinical Research Center, the First Affiliated Hospital of Nanjing Medical University,  
Nanjing, 210029, China

<sup>‡</sup>The two authors contributed equally to the work.

**Contents:**

- 1. Experimental details and characterization of products 4**
- 2. X-ray single crystal data for 4aaa**
- 3. <sup>1</sup>H and <sup>13</sup>C NMR spectra of products 4**

## Experimental details and characterization of products 4

### General

NMR spectra were measured respectively at 400 and 100 MHz on a Bruker-400 MHz spectrometer. The solvent used for NMR spectroscopy was CDCl<sub>3</sub>, using tetramethylsilane as the internal reference. HRMS (Bio TOF Q) spectra were recorded with an ESI resource on P-SIMS-Gly of Bruker Daltonics Inc. Infrared spectra were recorded on a Nicolet MX-1E FT-IR spectrometer.

Analytical grade solvents for the column chromatography and commercially available reagents were used as received. All starting materials commercially available were used directly. Substrates **1a**, **1c-1r** and **1y** were synthesized according to the literature methods.<sup>1</sup>

### General procedure for the synthesis of spiro-oxindole-based 2,5-dihydropyrroles 4

The solution of isatins **1** (0.12 mmol), 2-aminomalonate **2a** (0.1 mmol), trifluoroacetic acid (0.02 mmol), and 3Å molecular sieves (100 mg) in 1,2-dichloroethane (0.5 mL) was stirred at rt for 20 min. Then, this resultant mixture was added with but-2-ynedioate **3** (1.2 mmol) and another 0.5 mL of 1,2-dichloroethane. The reaction mixture was stirred at 60 °C for 36 hrs. Then the reaction mixture was filtered to remove molecular sieves, and the solid powder was washed with ethyl acetate. The resultant solution was evaporated under the reduced pressure, and the residue was purified through flash column chromatography on silica gel to yield pure products **4**.

**5',5'-Diethyl 3',4'-dimethyl 2-oxospiro[indoline-3,2'-pyrrole]-3',4',5',5'(1'H)-tetracarboxylate (4baa)**: (Flash column chromatography eluent, petroleum ether/ acetone = 3/1); Reaction time = 36 h; Yield: 99%; Yellow solid; m.p. 145-147 °C; <sup>1</sup>H NMR (400 MHz, CDCl<sub>3</sub>) δ (ppm): 8.43 (s, 1H), 7.39 (d, *J* = 7.4 Hz, 1H), 7.26 – 7.20 (m, 1H), 7.03 (t, *J* = 7.6 Hz, 1H), 6.85 (d, *J* = 7.8 Hz, 1H), 4.34 (dd, *J* = 14.1, 7.0 Hz, 4H), 3.84 (s, 3H), 3.75 (s, 1H), 3.55 (s, 3H), 1.34 (dt, *J* = 14.4, 7.1 Hz, 6H); <sup>13</sup>C NMR (100 MHz, CDCl<sub>3</sub>) δ (ppm) : 176.5, 168.6, 168.0, 162.6, 161.3, 141.2, 140.0, 139.7, 130.3, 128.9, 125.0, 123.2, 110.3, 80.0, 75.5, 63.1, 62.8, 52.5, 13.92, 13.89; IR (KBr): γ 3334, 2981, 2940, 1742,

1674, 1610, 1479, 1439, 1297, 1252, 1113, 1031, 871, 814, 709  $\text{cm}^{-1}$ ; ESI FTMS exact mass calcd for  $(\text{C}_{21}\text{H}_{22}\text{N}_2\text{O}_9+\text{H})^+$  requires  $m/z$  447.1404, found  $m/z$  447.1376.

**5',5'-Diethyl**

**3',4'-dimethyl**

**1-methyl-2-oxospiro[indoline-3,2'-pyrrole]-3',4',5',5'(1'H)-tetracarboxylate (4caa):** (Flash column chromatography eluent, petroleum ether/ acetone = 6/1); Reaction time = 36 h; Yield: 90%; Light yellow solid; m.p. 132-134 °C;  $^1\text{H}$  NMR (400 MHz,  $\text{CDCl}_3$ )  $\delta$  (ppm) : 7.41 (dd,  $J = 7.4, 0.8$  Hz, 1H), 7.31 (td,  $J = 7.8, 1.3$  Hz, 1H), 7.06 (td,  $J = 7.6, 0.9$  Hz, 1H), 6.80 (d,  $J = 7.8$  Hz, 1H), 4.42 – 4.27 (m, 4H), 3.83 (s, 3H), 3.73 (s, 1H), 3.52 (s, 3H), 3.21 (s, 3H), 1.35 (t,  $J = 6.2$  Hz, 3H), 1.31 (d,  $J = 7.1$  Hz, 3H);  $^{13}\text{C}$  NMR (100 MHz,  $\text{CDCl}_3$ )  $\delta$  (ppm) : 174.3, 168.7, 168.0, 162.6, 161.1, 142.6, 140.2, 139.7, 129.9, 128.9, 125.0, 122.8, 109.7, 79.9, 75.1, 63.0, 53.0, 52.2, 27.3, 25.1, 13.9, 13.8; IR (KBr):  $\gamma$  3444, 3349, 2984, 2939, 2859, 1742, 1660, 1607, 1469, 1429, 1297, 1239, 1183, 1031, 871, 804, 749, 698  $\text{cm}^{-1}$ ; ESI FTMS exact mass calcd for  $(\text{C}_{22}\text{H}_{24}\text{N}_2\text{O}_9+\text{Na})^+$  requires  $m/z$  483.1374, found  $m/z$  483.1353.

**5',5'-Diethyl**

**3',4'-dimethyl**

**1-isopropyl-2-oxospiro[indoline-3,2'-pyrrole]-3',4',5',5'(1'H)-tetracarboxylate (4daa):** (Flash column chromatography eluent, petroleum ether/ ethyl acetate = 4/1); Reaction time = 36 h; Yield: 76%; Yellow sticky oil;  $^1\text{H}$  NMR (400 MHz,  $\text{CDCl}_3$ )  $\delta$  (ppm) : 7.43 (dd,  $J = 7.4, 1.0$  Hz, 1H), 7.27 (td,  $J = 7.8, 1.3$  Hz, 1H), 7.02 (td,  $J = 7.6, 0.8$  Hz, 1H), 6.95 (d,  $J = 7.9$  Hz, 1H), 4.62 – 4.49 (m, 1H), 4.42 – 4.29 (m, 4H), 3.82 (s, 3H), 3.77 (s, 1H), 3.51 (s, 3H), 1.49 (d,  $J = 5.8$  Hz, 3H), 1.47 (d,  $J = 5.7$  Hz, 3H), 1.38 – 1.33 (m, 3H), 1.31 (d,  $J = 7.1$  Hz, 3H);  $^{13}\text{C}$  NMR (100 MHz,  $\text{CDCl}_3$ )  $\delta$  (ppm) : 174.0, 168.7, 168.0, 162.6, 161.2, 142.7, 140.1, 139.7, 130.0, 129.0, 125.0, 122.7, 109.9, 79.9, 75.1, 63.0, 62.8, 52.4, 52.3, 44.5, 19.1, 13.9, 13.8; IR (KBr):  $\gamma$  3458, 3339, 2964, 2926, 2852, 1729, 1660, 1607, 1453, 1443, 1289, 1252, 1117, 1035, 871, 772  $\text{cm}^{-1}$ ; ESI FTMS exact mass calcd for  $(\text{C}_{24}\text{H}_{28}\text{N}_2\text{O}_9+\text{Na})^+$  requires  $m/z$  511.1687, found  $m/z$  511.1662.

**5',5'-Diethyl**

**3',4'-dimethyl**

**1-cyclopentyl-2-oxospiro[indoline-3,2'-pyrrole]-3',4',5',5'(1'H)-tetracarboxylate (4eaa):** (Flash column chromatography eluent, petroleum ether/ ethyl acetate = 4/1); Reaction time = 36 h; Yield: 87%; Yellow sticky oil;  $^1\text{H}$  NMR (400 MHz,  $\text{CDCl}_3$ )  $\delta$  (ppm) : 7.43 (dd,  $J = 7.4, 1.0$  Hz, 1H), 7.27 (td,  $J = 7.8, 1.3$  Hz, 1H), 7.03 (td,  $J = 7.6, 0.8$  Hz, 1H), 6.88 (d,  $J = 7.9$  Hz, 1H), 4.69 (t,  $J = 8.7$  Hz, 1H), 4.40 – 4.29 (m, 4H), 3.82 (s, 3H), 3.76 (s, 1H), 3.50 (s, 3H), 2.08 (dt,  $J = 15.0, 7.4$  Hz, 2H), 1.92 (d,  $J = 2.9$  Hz, 4H), 1.69 (s, 2H), 1.35 (t,  $J = 7.0$  Hz, 3H), 1.31 (d,  $J = 7.1$  Hz, 3H);  $^{13}\text{C}$  NMR (100 MHz,

CDCl<sub>3</sub>) δ (ppm) : 174.3, 168.7, 168.0, 162.6, 161.1, 142.6, 140.2, 139.7, 129.9, 128.9, 125.0, 122.8, 109.7, 79.9, 75.1, 63.0, 62.8, 53.0, 52.4, 52.2, 27.6, 27.3, 25.1, 25.1, 13.9, 13.8; IR (KBr): γ 3334, 2998, 2954, 2859, 1742, 1673, 1607, 1443, 1307, 1239, 1157, 1127, 1035, 874, 735, 700 cm<sup>-1</sup>; ESI FTMS exact mass calcd for (C<sub>26</sub>H<sub>30</sub>N<sub>2</sub>O<sub>9</sub>+Na)<sup>+</sup> requires m/z 537.1844, found m/z 537.1833.

**5',5'-Diethyl**

**3',4'-dimethyl**

**2-oxo-1-phenylspiro[indoline-3,2'-pyrrole]-3',4',5',5'(1'H)-tetracarboxylate (4faa):** (Flash column chromatography eluent, petroleum ether/ ethyl acetate = 4/1); Reaction time = 36 h; Yield: 79%; Yellow sticky oil; <sup>1</sup>H NMR (400 MHz, CDCl<sub>3</sub>) δ (ppm) : 7.54 – 7.48 (m, 3H), 7.46 – 7.37 (m, 3H), 7.24 (td, *J* = 7.8, 1.6 Hz, 1H), 7.10 (td, *J* = 7.6, 0.9 Hz, 1H), 6.79 (d, *J* = 7.8 Hz, 1H), 4.46 – 4.28 (m, 4H), 3.88 (s, 1H), 3.85 (s, 3H), 3.59 (s, 3H), 1.65 (s, 1H), 1.37 (t, *J* = 7.1 Hz, 3H), 1.30 (t, *J* = 7.1 Hz, 3H); <sup>13</sup>C NMR (100 MHz, CDCl<sub>3</sub>) δ (ppm) : 174.0, 168.6, 167.9, 162.6, 161.3, 144.0, 139.9, 139.9, 134.3, 130.2, 129.6, 128.2, 126.3, 125.0, 123.7, 109.6, 80.1, 75.4, 63.1, 62.9, 52.5, 29.7, 13.9, 13.8; IR (KBr): γ 3342, 2988, 2954, 2869, 1742, 1660, 1620, 1446, 1307, 1252, 1183, 1117, 1035, 939, 857, 789, 749, 693 cm<sup>-1</sup>; ESI FTMS exact mass calcd for (C<sub>27</sub>H<sub>26</sub>N<sub>2</sub>O<sub>9</sub>+Na)<sup>+</sup> requires m/z 545.1531, found m/z 545.1519.

**5',5'-Diethyl**

**3',4'-dimethyl**

**1-benzyl-2-oxospiro[indoline-3,2'-pyrrole]-3',4',5',5'(1'H)-tetracarboxylate (4aaa):**

(Flash column chromatography eluent, petroleum ether/ ethyl acetate = 4/1); Reaction time = 36 h; Yield: 73%; Light yellow solid; m.p. 149-151 °C; <sup>1</sup>H NMR (400 MHz, CDCl<sub>3</sub>) δ (ppm) : 7.45 – 7.36 (m, 3H), 7.36 – 7.23 (m, 3H), 7.20 (td, *J* = 7.8, 1.2 Hz, 1H), 7.02 (td, *J* = 7.6, 0.8 Hz, 1H), 6.71 (d, *J* = 7.8 Hz, 1H), 5.12 (d, *J* = 15.6 Hz, 1H), 4.66 (d, *J* = 15.6 Hz, 1H), 4.41 – 4.31 (m, 4H), 3.85 (s, 3H), 3.80 (s, 1H), 3.40 (s, 3H), 1.36 (t, *J* = 5.2 Hz, 3H), 1.33 (t, *J* = 5.2 Hz, 3H); <sup>13</sup>C NMR (100 MHz, CDCl<sub>3</sub>) δ (ppm) : 174.7, 168.6, 168.0, 162.6, 161.2, 143.2, 140.5, 139.6, 135.5, 130.2, 128.7, 128.6, 127.7, 124.7, 123.3, 109.3, 79.9, 75.0, 63.1, 62.9, 52.5, 52.3, 44.5, 13.9, 13.9; IR (KBr): γ 3349, 2984, 2954, 2859, 1729, 1660, 1613, 1498, 1429, 1262, 1035, 926, 854, 809, 690, 598 cm<sup>-1</sup>; ESI FTMS exact mass calcd for (C<sub>28</sub>H<sub>28</sub>N<sub>2</sub>O<sub>9</sub>+H)<sup>+</sup> requires m/z 537.1873, found m/z 537.1843.

**5',5'-Diethyl**

**3',4'-dimethyl**

**1-(naphthalen-1-ylmethyl)-2-oxospiro[indoline-3,2'-pyrrole]-3',4',5',5'(1'H)-tetracarboxylate**

**(4gaa):** (Flash column chromatography eluent, petroleum ether/ ethyl acetate = 4/1); Reaction time = 36 h; Yield: 64%; Yellow sticky oil; <sup>1</sup>H NMR (400 MHz, CDCl<sub>3</sub>) δ (ppm) : 8.15 (d, *J* = 8.4 Hz, 1H),

7.89 (d,  $J = 7.6$  Hz, 1H), 7.79 (d,  $J = 8.2$  Hz, 1H), 7.59 (ddd,  $J = 8.4, 6.9, 1.4$  Hz, 1H), 7.56 – 7.37 (m, 4H), 7.15 (td,  $J = 7.8, 1.2$  Hz, 1H), 7.03 (td,  $J = 7.6, 0.7$  Hz, 1H), 6.67 (d,  $J = 7.8$  Hz, 1H), 5.57 (d,  $J = 16.3$  Hz, 1H), 5.22 (d,  $J = 16.3$  Hz, 1H), 4.38 (qd,  $J = 7.1, 1.7$  Hz, 4H), 3.87 (s, 4H), 3.40 (s, 3H), 1.38 (t,  $J = 5.6$  Hz, 3H), 1.34 (t,  $J = 5.6$  Hz, 3H);  $^{13}\text{C}$  NMR (100 MHz,  $\text{CDCl}_3$ )  $\delta$  (ppm) : 174.9, 168.6, 167.9, 162.7, 161.2, 143.6, 140.7, 139.4, 133.8, 131.0, 130.3, 130.2, 128.8, 128.7, 128.3, 126.6, 125.9, 125.3, 125.0, 124.7, 123.4, 123.0, 109.8, 80.0, 75.1, 63.2, 62.9, 52.6, 52.4, 42.7, 13.9, 13.8; IR (KBr):  $\gamma$  3461, 3334, 2994, 2923, 2854, 1729, 1660, 1620, 1501, 1469, 1361, 1294, 1249, 1183, 1117, 1031, 854, 817,  $690\text{ cm}^{-1}$ ; ESI FTMS exact mass calcd for  $(\text{C}_{32}\text{H}_{30}\text{N}_2\text{O}_9+\text{Na})^+$  requires  $m/z$  609.1844, found  $m/z$  609.1836.

**5',5'-Diethyl**

**3',4'-dimethyl**

**4-chloro-1-methyl-2-oxospiro[indoline-3,2'-pyrrole]-3',4',5',5'(1'H)-tetracarboxylate (4haa):**

(Flash column chromatography eluent, petroleum ether/ acetone = 5/1); Reaction time = 36 h; Yield: 62%; Light yellow sticky oil;  $^1\text{H}$  NMR (400 MHz,  $\text{CDCl}_3$ )  $\delta$  (ppm) : 7.27 (t,  $J = 8.0$  Hz, 1H), 6.98 (dd,  $J = 8.2, 0.6$  Hz, 1H), 6.72 (d,  $J = 7.4$  Hz, 1H), 4.40 – 4.28 (m, 4H), 3.89 (s, 1H), 3.85 (s, 3H), 3.58 (s, 3H), 3.19 (s, 3H), 1.37 – 1.33 (m, 3H), 1.33 – 1.30 (m, 3H);  $^{13}\text{C}$  NMR (100 MHz,  $\text{CDCl}_3$ )  $\delta$  (ppm) : 173.7, 168.2, 167.6, 162.6, 161.5, 146.3, 141.6, 138.0, 131.8, 131.6, 124.0, 123.4, 106.8, 80.0, 75.2, 63.1, 62.8, 52.5, 26.8, 13.8; IR (KBr):  $\gamma$  3334, 2981, 2926, 2859, 1742, 1657, 1617, 1484, 1439, 1371, 1252, 1130, 1034, 871, 749,  $693\text{ cm}^{-1}$ ; ESI FTMS exact mass calcd for  $(\text{C}_{28}\text{H}_{28}\text{N}_2\text{O}_9+\text{H})^+$  requires  $m/z$  495.1170, found  $m/z$  495.1146.

**5',5'-Diethyl**

**3',4'-dimethyl**

**1,5-dimethyl-2-oxospiro[indoline-3,2'-pyrrole]-3',4',5',5'(1'H)-tetracarboxylate (4iaa):**

(Flash column chromatography eluent, petroleum ether/ acetone = 5/1); Reaction time = 36 h; Yield: 92%; Light yellow sticky oil;  $^1\text{H}$  NMR (400 MHz,  $\text{CDCl}_3$ )  $\delta$  (ppm) : 7.22 (s, 1H), 7.10 (d,  $J = 7.9$  Hz, 1H), 6.69 (d,  $J = 7.9$  Hz, 1H), 4.40 – 4.30 (m, 4H), 3.83 (s, 3H), 3.73 (s, 1H), 3.53 (s, 3H), 3.19 (s, 3H), 2.30 (s, 3H), 1.36 (t,  $J = 7.1$  Hz, 3H), 1.32 (t,  $J = 7.1$  Hz, 3H);  $^{13}\text{C}$  NMR (100 MHz,  $\text{CDCl}_3$ )  $\delta$  (ppm) : 174.5, 168.7, 168.0, 162.7, 161.2, 141.6, 139.8, 139.8, 132.9, 130.6, 128.4, 125.4, 108.0, 80.0, 75.3, 63.1, 62.8, 52.5, 52.4, 26.6, 21.0, 13.9, 13.8; IR (KBr):  $\gamma$  3334, 2981, 2939, 2864, 1742, 1633, 1511, 1456, 1426, 1262, 1143, 1031, 871, 772,  $693\text{ cm}^{-1}$ ; ESI FTMS exact mass calcd for  $(\text{C}_{23}\text{H}_{26}\text{N}_2\text{O}_9+\text{H})^+$  requires  $m/z$  475.1717, found  $m/z$  475.1689.

**5',5'-Diethyl**

**3',4'-dimethyl**

**5-methoxy-1-methyl-2-oxospiro[indoline-3,2'-pyrrole]-3',4',5',5'(1'H)-tetracarboxylate (4jaa):**

(Flash column chromatography eluent, petroleum ether/ acetone = 5/1); Reaction time = 36 h; Yield: 87%; Light yellow solid; m.p. 127-128 °C; <sup>1</sup>H NMR (400 MHz, CDCl<sub>3</sub>) δ (ppm) : 7.07 (d, *J* = 2.6 Hz, 1H), 6.83 (dd, *J* = 8.5, 2.6 Hz, 1H), 6.71 (d, *J* = 8.5 Hz, 1H), 4.39 – 4.31 (m, 4H), 3.83 (s, 3H), 3.77 (s, 3H), 3.75 (s, 1H), 3.54 (s, 3H), 3.19 (s, 3H), 1.38 – 1.33 (m, 3H), 1.31 (d, *J* = 7.1 Hz, 3H); <sup>13</sup>C NMR (100 MHz, CDCl<sub>3</sub>) δ (ppm) : 174.3, 168.6, 167.9, 162.6, 161.2, 156.5, 139.8, 139.7, 137.4, 129.8, 114.9, 111.7, 108.7, 80.0, 75.5, 63.0, 62.9, 55.8, 52.5, 52.4, 26.7, 13.9, 13.8; IR (KBr): γ 3344, 2981, 2926, 2872, 1742, 1660, 1607, 1456, 1361, 1294, 1239, 1183, 1117, 1035, 871, 745, 693 cm<sup>-1</sup>; ESI FTMS exact mass calcd for (C<sub>23</sub>H<sub>26</sub>N<sub>2</sub>O<sub>10</sub>+Na)<sup>+</sup> requires m/z 513.1479, found m/z 513.1476.

**5',5'-Diethyl**

**3',4'-dimethyl**

**5-bromo-1-methyl-2-oxospiro[indoline-3,2'-pyrrole]-3',4',5',5'(1'H)-tetracarboxylate (4kaa):**

(Flash column chromatography eluent, petroleum ether/ acetone = 5/1); Reaction time = 36 h; Yield: 85%; Light yellow solid; m.p. 148-150 °C; <sup>1</sup>H NMR (400 MHz, CDCl<sub>3</sub>) δ (ppm) : 7.56 (d, *J* = 1.9 Hz, 1H), 7.44 (dd, *J* = 8.3, 2.0 Hz, 1H), 6.69 (d, *J* = 8.3 Hz, 1H), 4.41 – 4.30 (m, 4H), 3.84 (s, 3H), 3.76 (s, 1H), 3.57 (s, 3H), 3.20 (s, 3H), 1.39 (t, *J* = 7.1 Hz, 3H), 1.32 (t, *J* = 7.1 Hz, 3H); <sup>13</sup>C NMR (100 MHz, CDCl<sub>3</sub>) δ (ppm): 174.0, 168.3, 167.6, 162.5, 160.9, 143.0, 140.5, 138.6, 133.1, 130.9, 128.0, 115.9, 109.7, 80.1, 75.0, 63.2, 63.0, 52.6, 52.5, 26.7, 13.9, 13.8; IR (KBr): γ 3352, 2994, 2954, 2859, 1742, 1647, 1603, 1469, 1429, 1252, 1133, 1035, 939, 857, 749, 680 cm<sup>-1</sup>; ESI FTMS exact mass calcd for (C<sub>22</sub>H<sub>23</sub>BrN<sub>2</sub>O<sub>9</sub>+Na)<sup>+</sup> requires m/z 563.0462, found m/z 563.0476.

**5',5'-Diethyl**

**3',4'-dimethyl**

**5-chloro-1-methyl-2-oxospiro[indoline-3,2'-pyrrole]-3',4',5',5'(1'H)-tetracarboxylate (4laa):**

(Flash column chromatography eluent, petroleum ether/ acetone = 5/1); Reaction time = 36 h; Yield: 86%; Light yellow solid; m.p. 128-130 °C; <sup>1</sup>H NMR (400 MHz, CDCl<sub>3</sub>) δ (ppm): 7.43 (d, *J* = 2.1 Hz, 1H), 7.29 (dd, *J* = 8.3, 2.1 Hz, 1H), 6.74 (d, *J* = 8.3 Hz, 1H), 4.36 (m, 4H), 3.84 (s, 3H), 3.77 (s, 1H), 3.56 (s, 3H), 3.20 (s, 3H), 1.38 (t, *J* = 7.1 Hz, 3H), 1.32 (t, *J* = 7.1 Hz, 3H); <sup>13</sup>C NMR (100 MHz, CDCl<sub>3</sub>) δ (ppm): 174.1, 168.4, 167.6, 162.5, 160.9, 142.5, 140.5, 138.7, 130.5, 130.1, 128.6, 125.3, 109.3, 80.1, 75.0, 63.2, 63.0, 52.6, 52.5, 26.8, 13.9, 13.8; IR (KBr): γ 3334, 2954, 2844, 1729, 1660, 1620, 1456, 1294, 1252, 1180, 1113, 1088, 1048, 867, 806, 749, 693 cm<sup>-1</sup>; ESI FTMS exact mass calcd for (C<sub>22</sub>H<sub>23</sub>ClN<sub>2</sub>O<sub>9</sub>+H)<sup>+</sup> requires m/z 495.1170, found m/z 495.1186.

**5',5'-Diethyl**

**3',4'-dimethyl**

**5-fluoro-1-methyl-2-oxospiro[indoline-3,2'-pyrrole]-3',4',5',5'(1'H)-tetracarboxylate (4maa):**

(Flash column chromatography eluent, petroleum ether/ acetone = 5/1); Reaction time = 36 h; Yield: 81%; Light yellow sticky oil; <sup>1</sup>H NMR (400 MHz, CDCl<sub>3</sub>) δ (ppm) : 7.22 (dd, *J* = 7.5, 2.6 Hz, 1H), 7.01 (td, *J* = 8.8, 2.6 Hz, 1H), 6.74 (dd, *J* = 8.5, 4.0 Hz, 1H), 4.39 – 4.31 (m, 4H), 3.83 (s, 3H), 3.77 (s, 1H), 3.55 (s, 3H), 3.21 (s, 3H), 1.36 (t, *J* = 7.1 Hz, 3H), 1.32 (t, *J* = 7.1 Hz, 3H); <sup>13</sup>C NMR (100 MHz, CDCl<sub>3</sub>) δ (ppm): 174.3, 168.5, 167.7, 162.5, 161.0, 160.7, 158.3, 140.3, 139.9, 139.0, 130.4, 116.6, 116.3, 113.1, 112.9, 108.9, 108.8, 80.1, 75.3, 75.3, 63.1, 63.0, 52.5, 26.8, 13.9, 13.8; IR (KBr): γ 3334, 2959, 2913, 2854, 1739, 1660, 1634, 1494, 1443, 1294, 1249, 1035, 864, 809, 693 cm<sup>-1</sup>; ESI FTMS exact mass calcd for (C<sub>22</sub>H<sub>23</sub>FN<sub>2</sub>O<sub>9</sub>+H)<sup>+</sup> requires m/z 479.1466, found m/z 479.1463.

**5',5'-Diethyl**

**3',4'-dimethyl**

**1-benzyl-5-methyl-2-oxospiro[indoline-3,2'-pyrrole]-3',4',5',5'(1'H)-tetracarboxylate (4naa):**

(Flash column chromatography eluent, petroleum ether/ acetone = 6/1); Reaction time = 36 h; Yield: 61%; Light yellow sticky oil; <sup>1</sup>H NMR (400 MHz, CDCl<sub>3</sub>) δ (ppm) : 7.38 (d, *J* = 7.0 Hz, 2H), 7.34 – 7.28 (m, 2H), 7.28 – 7.21 (m, 2H), 6.99 (dd, *J* = 7.9, 0.9 Hz, 1H), 6.59 (d, *J* = 7.9 Hz, 1H), 5.10 (d, *J* = 15.6 Hz, 1H), 4.63 (d, *J* = 15.6 Hz, 1H), 4.37 (m, 4H), 3.85 (s, 3H), 3.80 (s, 1H), 3.41 (s, 3H), 2.27 (s, 3H), 1.37 (t, *J* = 7.2 Hz, 3H), 1.33 (t, *J* = 7.1 Hz, 3H); <sup>13</sup>C NMR (100 MHz, CDCl<sub>3</sub>) δ (ppm): 174.6, 168.6, 168.0, 162.7, 161.2, 140.8, 140.3, 139.7, 135.6, 133.0, 130.5, 128.7, 128.5, 127.7, 127.6, 125.4, 109.1, 79.9, 75.2, 63.1, 62.9, 52.5, 52.3, 44.5, 21.0, 13.9, 13.8; IR (KBr): γ 3334, 2978, 2936, 2872, 1732, 1647, 1620, 1469, 1443, 1389, 1255, 1117, 1035, 933, 857, 745, 690 cm<sup>-1</sup>; ESI FTMS exact mass calcd for (C<sub>29</sub>H<sub>30</sub>N<sub>2</sub>O<sub>9</sub>+H)<sup>+</sup> requires m/z 551.2030, found m/z 551.2040.

**5',5'-Diethyl**

**3',4'-dimethyl**

**1-benzyl-5-methoxy-2-oxospiro[indoline-3,2'-pyrrole]-3',4',5',5'(1'H)-tetracarboxylate (4oaa):**

(Flash column chromatography eluent, petroleum ether/ acetone = 6/1); Reaction time = 36 h; Yield: 62%; Light yellow solid; m.p. 145-147 °C; <sup>1</sup>H NMR (400 MHz, CDCl<sub>3</sub>) δ (ppm) : 7.41 – 7.35 (m, 2H), 7.35 – 7.27 (m, 3H), 7.07 (d, *J* = 2.6 Hz, 1H), 6.72 (dd, *J* = 8.5, 2.6 Hz, 1H), 6.60 (d, *J* = 8.5 Hz, 1H), 5.09 (d, *J* = 15.5 Hz, 1H), 4.63 (d, *J* = 15.6 Hz, 1H), 4.37 (m, 4H), 3.84 (s, 3H), 3.82 (s, 1H), 3.74 (s, 3H), 3.42 (s, 3H), 1.36 (t, *J* = 6.0 Hz, 3H), 1.33 (t, *J* = 6.0 Hz, 3H); <sup>13</sup>C NMR (100 MHz, CDCl<sub>3</sub>) δ (ppm): 174.5, 168.6, 167.9, 162.6, 161.1, 156.5, 140.4, 139.6, 136.4, 135.6, 129.9, 128.7, 127.7, 114.9, 111.6, 109.9, 79.9, 75.4, 63.1, 62.9, 55.7, 52.5, 52.3, 44.6, 13.9, 13.9; IR (KBr): γ 3444, 3334, 2984,

2923, 2859, 1729, 1610, 1498, 1469, 1371, 1296, 1252, 1170, 1120, 1018, 857, 745  $\text{cm}^{-1}$ ; ESI FTMS exact mass calcd for  $(\text{C}_{29}\text{H}_{30}\text{N}_2\text{O}_{10}+\text{H})^+$  requires  $m/z$  567.1979, found  $m/z$  567.1973.

**5',5'-Diethyl**

**3',4'-dimethyl**

**1-benzyl-5-bromo-2-oxospiro[indoline-3,2'-pyrrole]-3',4',5',5'(1'H)-tetracarboxylate (4paa):**

(Flash column chromatography eluent, petroleum ether/ acetone = 6/1); Reaction time = 36 h; Yield: 67%; Light yellow solid; m.p. 118-120 °C;  $^1\text{H}$  NMR (400 MHz,  $\text{CDCl}_3$ )  $\delta$  (ppm) : 7.56 (d,  $J$  = 2.0 Hz, 1H), 7.39 – 7.26 (m, 6H), 6.57 (d,  $J$  = 8.3 Hz, 1H), 5.09 (d,  $J$  = 15.6 Hz, 1H), 4.66 (d,  $J$  = 15.6 Hz, 1H), 4.37 (m, 4H), 3.86 (s, 3H), 3.83 (s, 1H), 3.46 (s, 3H), 1.39 (t,  $J$  = 7.1 Hz, 3H), 1.33 (t,  $J$  = 7.1 Hz, 3H) ;  $^{13}\text{C}$  NMR (100 MHz,  $\text{CDCl}_3$ )  $\delta$  (ppm): 174.2, 168.3, 167.6, 162.5, 160.8, 142.2, 141.1, 138.5, 135.0, 133.0, 131.0, 128.8, 128.0, 127.6, 116.0, 110.8, 80.1, 74.9, 63.3, 63.1, 62.8, 52.6, 44.6, 13.9, 13.8; IR (KBr):  $\gamma$  3458, 3346, 2988, 2923, 2862, 1739, 1657, 1607, 1484, 1364, 1297, 1235, 1103, 1028, 867, 817, 680  $\text{cm}^{-1}$ ; ESI FTMS exact mass calcd for  $(\text{C}_{28}\text{H}_{27}\text{BrN}_2\text{O}_9+\text{Na})^+$  requires  $m/z$  639.0776, found  $m/z$  639.0770.

**5',5'-Diethyl**

**3',4'-dimethyl**

**1-benzyl-6-bromo-2-oxospiro[indoline-3,2'-pyrrole]-3',4',5',5'(1'H)-tetracarboxylate (4qaa):**

(Flash column chromatography eluent, petroleum ether/ ethyl acetate = 6/1); Reaction time = 36 h; Yield: 63%; Light yellow sticky oil;  $^1\text{H}$  NMR (400 MHz,  $\text{CDCl}_3$ )  $\delta$  (ppm) : 7.29 (dd,  $J$  = 7.1, 3.8 Hz, 3H), 7.26 – 7.17 (m, 3H), 7.08 (dd,  $J$  = 7.9, 1.6 Hz, 1H), 6.77 (d,  $J$  = 1.6 Hz, 1H), 5.01 (d,  $J$  = 15.6 Hz, 1H), 4.54 (d,  $J$  = 15.6 Hz, 1H), 4.34 – 4.22 (m, 4H), 3.76 (s, 3H), 3.68 (s, 1H), 3.35 (s, 3H), 1.26 (dd,  $J$  = 15.3, 7.2 Hz, 6H) ;  $^{13}\text{C}$  NMR (100 MHz,  $\text{CDCl}_3$ )  $\delta$  (ppm): 174.6, 168.5, 167.8, 162.5, 161.0, 144.5, 140.9, 138.8, 134.9, 128.9, 127.9, 127.7, 127.6, 126.3, 126.1, 123.9, 112.7, 79.9, 74.6, 63.2, 63.0, 52.6, 52.5, 44.6, 13.9, 13.8; IR (KBr):  $\gamma$  3334, 2981, 2954, 2859, 1742, 1660, 1617, 1484, 1429, 1294, 1252, 1113, 1035, 857, 817, 693  $\text{cm}^{-1}$ ; ESI FTMS exact mass calcd for  $(\text{C}_{28}\text{H}_{27}\text{BrN}_2\text{O}_9+\text{Na})^+$  requires  $m/z$  639.0776, found  $m/z$  639.0786.

**5',5'-Diethyl**

**3',4'-dimethyl**

**1-benzyl-7-bromo-2-oxospiro[indoline-3,2'-pyrrole]-3',4',5',5'(1'H)-tetracarboxylate (4raa):**

(Flash column chromatography eluent, petroleum ether/ ethyl acetate = 6/1); Reaction time = 36 h; Yield: 79%; Light yellow solid; m.p. 134-137 °C;  $^1\text{H}$  NMR (400 MHz,  $\text{CDCl}_3$ )  $\delta$  (ppm) : 7.43-7.38 (m, 2H), 7.36 – 7.27 (m, 4H), 7.24 (s, 1H), 6.93 (dd,  $J$  = 8.1, 7.4 Hz, 1H), 5.47 – 5.25 (m, 2H), 4.40-4.31 (m, 4H), 3.84 (s, 3H), 3.80 (s, 1H), 3.51 (s, 3H), 1.35 (t,  $J$  = 7.1 Hz, 3H), 1.31 (t,  $J$  = 7.1 Hz, 3H);  $^{13}\text{C}$



NMR (100 MHz, CDCl<sub>3</sub>) δ (ppm): 175.6, 168.5, 167.7, 162.5, 161.0, 141.0, 140.8, 138.9, 137.2, 136.1, 132.14, 128.4, 127.1, 126.8, 124.7, 124.1, 102.5, 79.9, 74.3, 63.2, 63.0, 52.6, 52.5, 45.2, 13.9, 13.8; IR (KBr): γ 3334, 2968, 2872, 1729, 1660, 1607, 1474, 1443, 1307, 1239, 1173, 1031, 871, 749 cm<sup>-1</sup>; ESI FTMS exact mass calcd for (C<sub>28</sub>H<sub>27</sub>BrN<sub>2</sub>O<sub>9</sub>+Na)<sup>+</sup> requires m/z 639.0776, found m/z 639.0779.

**5',5'-Diethyl**

**3',4'-dimethyl**

**5-methyl-2-oxospiro[indoline-3,2'-pyrrole]-3',4',5',5'(1'H)-tetracarboxylate (4saa):** (Flash column chromatography eluent, petroleum ether/ acetone = 5/1); Reaction time = 36 h; Yield: 99%; Yellow solid; m.p. 157-159 °C; <sup>1</sup>H NMR (400 MHz, CDCl<sub>3</sub>) δ (ppm) : 8.28 (s, 1H), 7.20 (s, 1H), 7.08 – 7.00 (m, 1H), 6.74 (d, *J* = 7.9 Hz, 1H), 4.36 (m, 4H), 3.85 (s, 3H), 3.75 (s, 1H), 3.57 (s, 3H), 2.29 (s, 3H), 1.37 (t, *J* = 7.1 Hz, 3H), 1.33 (t, *J* = 7.1 Hz, 3H) ; <sup>13</sup>C NMR (100 MHz, CDCl<sub>3</sub>) δ (ppm): 176.5, 168.6, 168.0, 162.6, 161.3, 139.9, 139.8, 138.7, 132.8, 130.6, 128.9, 125.6, 110.0, 80.0, 75.6, 63.1, 62.8, 52.5, 52.5, 21.0, 13.9, 13.8; IR (KBr): γ 3339, 2992, 2943, 2923, 2846, 1736, 1610, 1493, 1474, 1448, 1299, 1254, 1127, 1037, 864, 751 cm<sup>-1</sup>; ESI FTMS exact mass calcd for (C<sub>22</sub>H<sub>24</sub>N<sub>2</sub>O<sub>9</sub>+Na)<sup>+</sup> requires m/z 483.1374, found m/z 483.1364.

**5',5'-Diethyl**

**3',4'-dimethyl**

**5-methoxy-2-oxospiro[indoline-3,2'-pyrrole]-3',4',5',5'(1'H)-tetracarboxylate (4taa):** (Flash column chromatography eluent, petroleum ether/ acetone = 5/1); Reaction time = 36 h; Yield: 99%; Light yellow solid; m.p. 140-142 °C; <sup>1</sup>H NMR (400 MHz, CDCl<sub>3</sub>) δ (ppm) : 8.21 (s, 1H), 7.03 (d, *J* = 2.0 Hz, 1H), 6.84 – 6.68 (m, 2H), 4.43 – 4.27 (m, 4H), 3.84 (s, 3H), 3.76 (s, 4H), 3.57 (s, 3H), 1.36 (t, *J* = 7.2 Hz, 3H), 1.32 (t, *J* = 7.2 Hz, 3H) ; <sup>13</sup>C NMR (100 MHz, CDCl<sub>3</sub>) δ (ppm): 176.3, 168.6, 167.9, 162.6, 161.2, 156.3, 140.0, 139.6, 134.3, 130.2, 115.4, 111.6, 110.7, 80.0, 75.9, 63.1, 62.9, 55.7, 52.5, 52.5, 13.9, 13.8; IR (KBr): γ 3321, 2984, 2929, 2859, 1742, 1660, 1607, 1469, 1443, 1371, 1294, 1239, 1183, 1143, 1103, 1035, 857, 779, 735 cm<sup>-1</sup>; ESI FTMS exact mass calcd for (C<sub>22</sub>H<sub>24</sub>N<sub>2</sub>O<sub>10</sub>+H)<sup>+</sup> requires m/z 477.1509, found m/z 477.1517.

**5',5'-Diethyl**

**3',4'-dimethyl**

**5-fluoro-2-oxospiro[indoline-3,2'-pyrrole]-3',4',5',5'(1'H)-tetracarboxylate (4uaa):** (Flash column chromatography eluent, petroleum ether/ acetone = 5/1); Reaction time = 36 h; Yield: 99%; Light yellow solid; m.p. 165-167 °C; <sup>1</sup>H NMR (400 MHz, CDCl<sub>3</sub>) δ (ppm) : 8.42 (s, 1H), 7.18 (dd, *J* = 7.6, 2.6 Hz, 1H), 6.95 (td, *J* = 8.8, 2.6 Hz, 1H), 6.80 (dd, *J* = 8.5, 4.1 Hz, 1H), 4.35 (m, 4H), 3.85 (s, 3H), 3.80 (s, 1H), 3.58 (s, 3H), 1.37 (t, *J* = 7.1 Hz, 3H), 1.31 (t, *J* = 7.1 Hz, 3H); <sup>13</sup>C NMR (100 MHz,

CDCl<sub>3</sub>) δ (ppm): 176.5, 168.4, 167.7, 162.4, 161.1, 160.5, 158.1, 140.4, 139.0, 137.1, 130.8, 116.8, 116.6, 113.2, 112.9, 111.1, 111.0, 80.0, 75.8, 63.2, 63.0, 52.6, 13.9, 13.8; IR (KBr): γ 3468, 3349, 2971, 2939, 2862, 1742, 1670, 1607, 1484, 1443, 1347, 1294, 1249, 1183, 1130, 1035, 857, 755, 709 cm<sup>-1</sup>; ESI FTMS exact mass calcd for (C<sub>21</sub>H<sub>21</sub>FN<sub>2</sub>O<sub>9</sub>+H)<sup>+</sup> requires m/z 465.1309, found m/z 465.1301.

**5',5'-Diethyl**

**3',4'-dimethyl**

**7-bromo-2-oxospiro[indoline-3,2'-pyrrole]-3',4',5',5'(1'H)-tetracarboxylate (4vaa):** (Flash column chromatography eluent, petroleum ether/ acetone = 5/1); Reaction time = 36 h; Yield: 76%; Light yellow solid; m.p. 95-96 °C; <sup>1</sup>H NMR (400 MHz, CDCl<sub>3</sub>) δ (ppm) : 7.70 (s, 1H), 7.37 (dd, *J* = 12.4, 4.1 Hz, 2H), 6.94 (t, *J* = 7.8 Hz, 1H), 4.41 – 4.30 (m, 4H), 3.85 (s, 3H), 3.78 (s, 1H), 3.58 (s, 3H), 1.35 (t, *J* = 6.7 Hz, 3H), 1.30 (d, *J* = 7.1 Hz, 3H); <sup>13</sup>C NMR (100 MHz, CDCl<sub>3</sub>) δ (ppm): 174.8, 168.4, 167.6, 162.5, 160.9, 140.6, 140.4, 138.7, 132.8, 130.5, 124.5, 124.04, 103.0, 80.1, 76.5, 63.2, 63.0, 52.6, 13.9, 13.8; IR (KBr): γ 3334, 2981, 2923, 2859, 1732, 1607, 1479, 1456, 1374, 1294, 1254, 1117, 1035, 857 cm<sup>-1</sup>; ESI FTMS exact mass calcd for (C<sub>21</sub>H<sub>21</sub>BrN<sub>2</sub>O<sub>9</sub>+Na)<sup>+</sup> requires m/z 549.0305, found m/z 549.0320.

**5',5'-Diethyl**

**3',4'-dimethyl**

**2-oxo-7-(trifluoromethyl)spiro[indoline-3,2'-pyrrole]-3',4',5',5'(1'H)-tetracarboxylate (4waa):** (Flash column chromatography eluent, petroleum ether/ acetone = 6/1); Reaction time = 36 h; Yield: 58%; Light yellow sticky oil; <sup>1</sup>H NMR (400 MHz, CDCl<sub>3</sub>) δ (ppm) : 7.87 (s, 1H), 7.62 (d, *J* = 7.4 Hz, 1H), 7.47 (d, *J* = 8.0 Hz, 1H), 7.14 (t, *J* = 7.8 Hz, 1H), 4.36 (dd, *J* = 7.0, 5.0 Hz, 4H), 3.85 (s, 3H), 3.80 (s, 1H), 3.56 (s, 3H), 1.34 (m, 6H); <sup>13</sup>C NMR (100 MHz, CDCl<sub>3</sub>) δ (ppm): 175.3, 168.4, 167.6, 162.4, 160.7, 141.1, 138.5, 138.3, 131.0, 128.7, 126.9, 126.8, 125.0, 123.1, 122.3, 112.5, 112.2, 80.1, 74.2, 63.2, 63.0, 52.6, 52.5, 13.9, 13.8; IR (KBr): γ 3349, 2981, 2949, 2859, 1739, 1660, 1607, 1498, 1446, 1299, 1235, 1130, 1031, 871, 814, 680 cm<sup>-1</sup>; ESI FTMS exact mass calcd for (C<sub>22</sub>H<sub>21</sub>F<sub>3</sub>N<sub>2</sub>O<sub>9</sub>+H)<sup>+</sup> requires m/z 515.1277, found m/z 515.1286.

**5',5'-Diethyl**

**3',4'-dimethyl**

**5,6-difluoro-2-oxospiro[indoline-3,2'-pyrrole]-3',4',5',5'(1'H)-tetracarboxylate (4xaa):** (Flash column chromatography eluent, petroleum ether/ acetone = 5/1); Reaction time = 36 h; Yield: 52%; Light yellow solid; m.p. 175-177 °C; <sup>1</sup>H NMR (400 MHz, CDCl<sub>3</sub>) δ (ppm) : 8.50 (s, 1H), 7.35 – 7.27 (m, 1H), 6.73 (dd, *J* = 9.7, 6.3 Hz, 1H), 4.35 (dt, *J* = 12.1, 7.1 Hz, 4H), 3.85 (s, 3H), 3.78 (s, 1H), 3.61 (s, 3H), 1.37 (t, *J* = 7.1 Hz, 3H), 1.31 (t, *J* = 7.1 Hz, 3H); <sup>13</sup>C NMR (100 MHz, CDCl<sub>3</sub>) δ (ppm): 176.5,

168.4, 167.7, 162.4, 161.0, 140.6, 138.5, 137.4, 124.7, 115.0, 114.7, 100.7, 100.5, 80.0, 75.3, 63.3, 63.1, 52.7, 52.6, 13.9, 13.8; IR (KBr):  $\gamma$  3344, 2954, 2841, 1729, 1660, 1607, 1484, 1443, 1265, 1209, 1143, 1601, 1031, 871, 807, 693, 598  $\text{cm}^{-1}$ ; ESI FTMS exact mass calcd for  $(\text{C}_{21}\text{H}_{20}\text{F}_2\text{N}_2\text{O}_9+\text{Na})^+$  requires  $m/z$  505.1029, found  $m/z$  505.1020.

**Tetraethyl 2-oxospiro[indoline-3,2'-pyrrole]-3',4',5',5'(1'H)-tetracarboxylate (4bab):** (Flash column chromatography eluent, petroleum ether/ acetone = 4/1); Reaction time = 36 h; Yield: 99%; Yellow sticky oil;  $^1\text{H}$  NMR (400 MHz,  $\text{CDCl}_3$ )  $\delta$  (ppm) : 8.28 (s, 1H), 7.41 (d,  $J = 7.4$  Hz, 1H), 7.23 (dd,  $J = 7.7, 1.2$  Hz, 2H), 7.03 (td,  $J = 7.6, 0.9$  Hz, 1H), 6.84 (d,  $J = 7.7$  Hz, 1H), 4.49 – 4.17 (m, 6H), 4.11 – 3.83 (m, 2H), 3.76 (s, 1H), 1.37-1.30 (m, 9H), 0.98 (t,  $J = 7.1$  Hz, 3H);  $^{13}\text{C}$  NMR (100 MHz,  $\text{CDCl}_3$ )  $\delta$  (ppm): 176.5, 168.7, 168.1, 162.1, 160.8, 141.2, 139.9, 139.8, 130.2, 129.2, 125.1, 123.2, 110.1, 80.0, 75.5, 63.0, 62.8, 61.8, 61.6, 13.9, 13.9, 13.4; IR (KBr):  $\gamma$  3362, 3444, 2964, 2876, 1739, 1670, 1610, 1469, 1389, 1374, 1294, 1239, 1180, 1130, 1103, 1035, 857, 749  $\text{cm}^{-1}$ ; ESI FTMS exact mass calcd for  $(\text{C}_{23}\text{H}_{26}\text{N}_2\text{O}_9+\text{Na})^+$  requires  $m/z$  497.1531, found  $m/z$  497.1531.

**Tetraethyl 1-methyl-2-oxospiro[indoline-3,2'-pyrrole]-3',4',5',5'(1'H)-tetracarboxylate (4cab):** (Flash column chromatography eluent, petroleum ether/ ethyl acetate = 4/1); Reaction time = 36 h; Yield: 94%; Yellow sticky oil;  $^1\text{H}$  NMR (400 MHz,  $\text{CDCl}_3$ )  $\delta$  (ppm) : 7.43 (d,  $J = 7.3$  Hz, 1H), 7.31 (td,  $J = 7.7, 1.1$  Hz, 1H), 7.05 (t,  $J = 7.5$  Hz, 1H), 6.79 (d,  $J = 7.8$  Hz, 1H), 4.41 – 4.15 (m, 6H), 4.00-3.88 (m, 2H), 3.74 (s, 1H), 3.20 (s, 3H), 1.37-1.29 (m, 9H), 0.95 (t,  $J = 7.1$  Hz, 3H);  $^{13}\text{C}$  NMR (100 MHz,  $\text{CDCl}_3$ )  $\delta$  (ppm): 174.7, 168.7, 168.1, 162.1, 160.7, 144.0, 139.9, 139.8, 130.2, 128.7, 124.7, 123.3, 108.1, 79.9, 75.1, 63.0, 62.8, 61.7, 61.3, 29.6, 26.5, 13.9, 13.8, 13.5; IR (KBr):  $\gamma$  3334, 2994, 2954, 2859, 1739, 1660, 1484, 1429, 1262, 1035, 857, 804, 680, 598  $\text{cm}^{-1}$ ; ESI FTMS exact mass calcd for  $(\text{C}_{24}\text{H}_{28}\text{N}_2\text{O}_9+\text{Na})^+$  requires  $m/z$  511.1687, found  $m/z$  511.1687.

**Tetraethyl 1-cyclopentyl-2-oxospiro[indoline-3,2'-pyrrole]-3',4',5',5'(1'H)-tetracarboxylate (4eab):** (Flash column chromatography eluent, petroleum ether/ ethyl acetate = 6/1); Reaction time = 36 h; Yield: 87%; Yellow sticky oil;  $^1\text{H}$  NMR (400 MHz,  $\text{CDCl}_3$ )  $\delta$  (ppm) : 7.45 (dd,  $J = 7.4, 1.0$  Hz, 1H), 7.27 (td,  $J = 7.8, 1.3$  Hz, 1H), 7.03 (td,  $J = 7.6, 0.7$  Hz, 1H), 6.88 (d,  $J = 7.9$  Hz, 1H), 4.73-4.64 (m, 1H), 4.39 – 4.25 (m, 6H), 4.06 – 3.87 (m, 2H), 3.77 (s, 1H), 2.14 – 1.88 (m, 6H), 1.71 – 1.62 (m, 2H), 1.37 – 1.29 (m, 9H), 0.93 (t,  $J = 7.1$  Hz, 3H) ;  $^{13}\text{C}$  NMR (100 MHz,  $\text{CDCl}_3$ )  $\delta$  (ppm): 174.4, 168.8, 168.2, 162.1, 160.7, 142.7, 140.3, 139.6, 129.8, 129.2, 125.1, 122.8, 109.6, 79.9, 75.1, 62.9, 62.8, 61.7, 61.3, 53.0, 27.7, 27.3, 25.2, 25.1, 13.9, 13.9, 13.8, 13.6; IR (KBr):  $\gamma$  3484, 3344, 2981, 2939, 2859, 1739,

1663, 1607, 1456, 1439, 1294, 1249, 1130, 1038, 867, 749  $\text{cm}^{-1}$ ; ESI FTMS exact mass calcd for  $(\text{C}_{28}\text{H}_{34}\text{N}_2\text{O}_9+\text{Na})^+$  requires  $m/z$  565.2157, found  $m/z$  565.2131.

**Tetraethyl 2-oxo-1-phenylspiro[indoline-3,2'-pyrrole]-3',4',5',5'(1'H)-tetracarboxylate (4fab):**

(Flash column chromatography eluent, petroleum ether/ ethyl acetate = 6/1); Reaction time = 36 h; Yield: 84%; Yellow sticky oil;  $^1\text{H}$  NMR (400 MHz,  $\text{CDCl}_3$ )  $\delta$  (ppm) : 7.56 – 7.34 (m, 6H), 7.23 (dd,  $J$  = 7.8, 1.2 Hz, 1H), 7.10 (td,  $J$  = 7.6, 0.7 Hz, 1H), 6.81 (d,  $J$  = 7.9 Hz, 1H), 4.43 – 4.21 (m, 6H), 4.12 – 3.94 (m, 2H), 3.88 (s, 1H), 1.42 – 1.27 (m, 9H), 0.98 (t,  $J$  = 7.1 Hz, 3H);  $^{13}\text{C}$  NMR (100 MHz,  $\text{CDCl}_3$ )  $\delta$  (ppm): 174.1, 168.8, 168.0, 162.1, 160.8, 144.0, 140.0, 139.8, 134.3, 130.1, 129.5, 128.4, 128.1, 126.2, 125.1, 123.7, 109.5, 80.1, 75.4, 63.0, 62.8, 61.8, 61.6, 13.9, 13.9, 13.9, 13.7; IR (KBr):  $\gamma$  3458, 3336, 2981, 2951, 2861, 1739, 1663, 1608, 1484, 1439, 1307, 1257, 1183, 1133, 1048, 861, 821, 740, 710, 640  $\text{cm}^{-1}$ ; ESI FTMS exact mass calcd for  $(\text{C}_{29}\text{H}_{30}\text{N}_2\text{O}_9+\text{H})^+$  requires  $m/z$  551.2030, found  $m/z$  551.2030.

**Tetraethyl 1-benzyl-2-oxospiro[indoline-3,2'-pyrrole]-3',4',5',5'(1'H)-tetracarboxylate (4aab):**

(Flash column chromatography eluent, petroleum ether/ ethyl acetate = 6/1); Reaction time = 36 h; Yield: 85%; Yellow sticky oil;  $^1\text{H}$  NMR (400 MHz,  $\text{CDCl}_3$ )  $\delta$  7.45 – 7.24 (m, 6H), 7.19 (td,  $J$  = 7.8, 1.2 Hz, 1H), 7.02 (td,  $J$  = 7.6, 0.8 Hz, 1H), 6.69 (d,  $J$  = 7.8 Hz, 1H), 5.02 (d,  $J$  = 15.6 Hz, 1H), 4.74 (d,  $J$  = 15.6 Hz, 1H), 4.39 – 4.24 (m, 6H), 4.01-3.95 (m, 1H), 3.82 – 3.77 (m, 2H), 1.38-1.28 (m, 9H), 0.81 (t,  $J$  = 7.1 Hz, 3H);  $^{13}\text{C}$  NMR (100 MHz,  $\text{CDCl}_3$ )  $\delta$  (ppm): 174.8, 168.7, 168.1, 162.1, 160.7, 143.3, 140.2, 139.8, 135.5, 130.1, 128.8, 128.7, 127.7, 124.8, 123.3, 109.2, 79.9, 75.1, 63.0, 62.8, 61.8, 61.4, 44.5, 13.9, 13.9, 13.4; IR (KBr):  $\gamma$  3349, 2939, 2859, 1729, 1660, 1607, 1484, 1443, 1294, 1249, 1130, 1035, 857, 804, 680  $\text{cm}^{-1}$ ; ESI FTMS exact mass calcd for  $(\text{C}_{30}\text{H}_{32}\text{N}_2\text{O}_9+\text{Na})^+$  requires  $m/z$  587.2000, found  $m/z$  587.2009.

**Tetraethyl 1,5-dimethyl-2-oxospiro[indoline-3,2'-pyrrole]-3',4',5',5'(1'H)-tetracarboxylate (4iab):**

(Flash column chromatography eluent, petroleum ether/ ethyl acetate = 3/1); Reaction time = 36 h; Yield: 86%; Yellow sticky oil;  $^1\text{H}$  NMR (400 MHz,  $\text{CDCl}_3$ )  $\delta$  (ppm) : 7.25 (m, 1H), 7.09 (m, 1H), 6.67 (d,  $J$  = 7.9 Hz, 1H), 4.38 – 4.26 (m, 6H), 4.01 – 3.89 (m, 2H), 3.74 (s, 1H), 3.18 (s, 3H), 2.30 (s, 3H), 1.38 – 1.29 (m, 9H), 0.96 (t,  $J$  = 7.1 Hz, 3H);  $^{13}\text{C}$  NMR (100 MHz,  $\text{CDCl}_3$ )  $\delta$  (ppm) : 174.6, 168.8, 168.1, 162.1, 160.7, 141.6, 140.0, 139.7, 132.9, 130.4, 128.6, 125.5, 107.9, 79.9, 75.3, 63.0, 62.8, 61.7, 61.3, 26.6, 21.0, 13.9, 13.8, 13.5; IR (KBr):  $\gamma$  3461, 3352, 2981, 2923, 2859, 1739, 1667, 1607, 1501,

1456, 1361, 1294, 1252, 1130, 1035, 939, 844, 762, 693  $\text{cm}^{-1}$ ; ESI FTMS exact mass calcd for  $(\text{C}_{25}\text{H}_{30}\text{N}_2\text{O}_9+\text{Na})^+$  requires  $m/z$  525.1844, found  $m/z$  525.1840.

**Tetraethyl 5-methoxy-1-methyl-2-oxospiro[indoline-3,2'-pyrrole]-3',4',5',5'(1'H)-tetracarboxylate**

**(4jab):** (Flash column chromatography eluent, petroleum ether/ ethyl acetate = 3/1); Reaction time = 36 h; Yield: 71%; Yellow sticky oil;  $^1\text{H}$  NMR (400 MHz,  $\text{CDCl}_3$ )  $\delta$  (ppm) : 7.09 (d,  $J$  = 2.6 Hz, 1H), 6.83 (dd,  $J$  = 8.5, 2.6 Hz, 1H), 6.70 (d,  $J$  = 8.5 Hz, 1H), 4.38-4.26 (m, 6H), 4.02 – 3.90 (m, 2H), 3.77 (s, 3H), 3.76 (s, 1H), 3.17 (s, 3H), 1.37 – 1.29 (m, 9H), 0.97 (t,  $J$  = 7.1 Hz, 3H);  $^{13}\text{C}$  NMR (100 MHz,  $\text{CDCl}_3$ )  $\delta$  (ppm): 174.4, 168.7, 168.0, 162.1, 160.6, 156.5, 139.9, 139.8, 137.4, 130.0, 114.9, 111.7, 108.6, 79.9, 75.5, 62.9, 62.8, 61.7, 61.4, 55.8, 26.6, 13.9, 13.9, 13.8, 13.5; IR (KBr):  $\gamma$  3334, 2991, 2926, 1742, 1660, 1607, 1456, 1374, 1252, 1198, 1127, 1035, 857, 762, 697  $\text{cm}^{-1}$ ; ESI FTMS exact mass calcd for  $(\text{C}_{25}\text{H}_{30}\text{N}_2\text{O}_{10}+\text{Na})^+$  requires  $m/z$  541.1793, found  $m/z$  541.1780.

**Tetraethyl 5-bromo-1-methyl-2-oxospiro[indoline-3,2'-pyrrole]-3',4',5',5'(1'H)-tetracarboxylate**

**(4kab):** (Flash column chromatography eluent, petroleum ether/ ethyl acetate = 3/1); Reaction time = 36 h; Yield: 79%; Light yellow solid; m.p. 128-130  $^\circ\text{C}$ ;  $^1\text{H}$  NMR (400 MHz,  $\text{CDCl}_3$ )  $\delta$  (ppm) : 7.58 (d,  $J$  = 2.0 Hz, 1H), 7.43 (dd,  $J$  = 8.3, 2.0 Hz, 1H), 6.68 (d,  $J$  = 8.3 Hz, 1H), 4.40 – 4.26 (m, 6H), 4.04 – 3.92 (m, 2H), 3.77 (s, 1H), 3.19 (s, 3H), 1.40 – 1.30 (m, 9H), 1.01 (t,  $J$  = 7.1 Hz, 3H);  $^{13}\text{C}$  NMR (100 MHz,  $\text{CDCl}_3$ )  $\delta$  (ppm): 174.2, 168.4, 167.8, 161.9, 160.4, 143.0, 140.5, 138.8, 132.9, 131.12, 128.0, 115.8, 109.6, 80.1, 75.0, 63.1, 63.0, 61.9, 61.6, 26.7, 13.9, 13.8, 13.5; IR (KBr):  $\gamma$  3349, 2994, 2958, 2872, 1742, 1660, 1633, 1488, 1443, 1265, 1035, 923, 814, 732, 690  $\text{cm}^{-1}$ ; ESI FTMS exact mass calcd for  $(\text{C}_{24}\text{H}_{27}\text{BrN}_2\text{O}_9+\text{Na})^+$  requires  $m/z$  589.0792, found  $m/z$  589.0781.

**Tetraethyl 5-chloro-1-methyl-2-oxospiro[indoline-3,2'-pyrrole]-3',4',5',5'(1'H)-tetracarboxylate**

**(4lab):** (Flash column chromatography eluent, petroleum ether/ ethyl acetate = 3/1); Reaction time = 36 h; Yield: 85%; Yellow sticky oil;  $^1\text{H}$  NMR (400 MHz,  $\text{CDCl}_3$ )  $\delta$  (ppm) : 7.45 (d,  $J$  = 2.1 Hz, 1H), 7.28 (dd,  $J$  = 8.3, 2.1 Hz, 1H), 6.73 (d,  $J$  = 8.3 Hz, 1H), 4.40 – 4.24 (m, 6H), 4.04 – 3.92 (m, 2H), 3.78 (s, 1H), 3.19 (s, 3H), 1.40 – 1.30 (m, 9H), 1.01 (t,  $J$  = 7.1 Hz, 3H);  $^{13}\text{C}$  NMR (100 MHz,  $\text{CDCl}_3$ )  $\delta$  (ppm): 174.3, 168.4, 167.8, 161.9, 160.4, 142.5, 140.5, 138.8, 130.7, 130.0, 128.6, 125.3, 109.1, 80.1, 75.0, 63.1, 63.0, 61.9, 61.6, 29.6, 26.7, 13.9, 13.8, 13.5; IR (KBr):  $\gamma$  3459, 3334, 2981, 2929, 2862, 1725, 1660, 1607, 1501, 1473, 1361, 1284, 1252, 1120, 1031, 861, 819  $\text{cm}^{-1}$ ; ESI FTMS exact mass calcd for  $(\text{C}_{24}\text{H}_{27}\text{ClN}_2\text{O}_9+\text{Na})^+$  requires  $m/z$  545.1297, found  $m/z$  545.1296.

**Tetraethyl 6-bromo-1-methyl-2-oxospiro[indoline-3,2'-pyrrole]-3',4',5',5'(1'H)-tetracarboxylate**

**(4yab):** (Flash column chromatography eluent, petroleum ether/ ethyl acetate = 5/1); Reaction time = 36 h; Yield: 73%; Yellow sticky oil;  $^1\text{H}$  NMR (400 MHz,  $\text{CDCl}_3$ )  $\delta$  (ppm) : 7.31 (d,  $J = 7.9$  Hz, 1H), 7.19 (dd,  $J = 7.9, 1.6$  Hz, 1H), 6.95 (d,  $J = 1.6$  Hz, 1H), 4.38 – 4.26 (m, 6H), 4.03 – 3.92 (m, 2H), 3.72 (s, 1H), 3.18 (s, 3H), 1.36 – 1.29 (m, 9H), 1.01 (t,  $J = 7.1$  Hz, 3H);  $^{13}\text{C}$  NMR (100 MHz,  $\text{CDCl}_3$ )  $\delta$  (ppm): 174.5, 168.6, 167.9, 162.0, 160.5, 145.3, 140.4, 138.9, 127.8, 126.1, 123.9, 111.7, 80.0, 74.7, 63.1, 62.9, 61.8, 61.5, 29.6, 26.7, 13.9, 13.8, 13.6; IR (KBr):  $\gamma$  3349, 2981, 2926, 2872, 1745, 1660, 1617, 1498, 1456, 1357, 1289, 1249, 1031, 953, 871, 817, 698  $\text{cm}^{-1}$ ; ESI FTMS exact mass calcd for  $(\text{C}_{24}\text{H}_{27}\text{BrN}_2\text{O}_9+\text{Na})^+$  requires  $m/z$  589.0792, found  $m/z$  589.0799.

**Tetraethyl 2-oxo-7-(trifluoromethyl)spiro[indoline-3,2'-pyrrole]-3',4',5',5'(1'H)-tetracarboxylate**

**(4wab):** (Flash column chromatography eluent, petroleum ether/ ethyl acetate = 4/1); Reaction time = 36 h; Yield: 73%; Yellow sticky oil;  $^1\text{H}$  NMR (400 MHz,  $\text{CDCl}_3$ )  $\delta$  (ppm) : 7.78 (s, 1H), 7.64 (d,  $J = 7.4$  Hz, 1H), 7.47 (d,  $J = 8.0$  Hz, 1H), 7.15 (t,  $J = 7.7$  Hz, 1H), 4.38 – 4.26 (m, 6H), 4.05 – 3.95 (m, 2H), 3.81 (s, 1H), 1.61 (s, 1H), 1.37 – 1.29 (m, 9H), 0.98 (t,  $J = 7.1$  Hz, 3H);  $^{13}\text{C}$  NMR (100 MHz,  $\text{CDCl}_3$ )  $\delta$  (ppm): 175.4, 168.5, 167.7, 161.9, 160.2, 141.3, 138.5, 138.3, 131.2, 128.8, 126.8, 125.0, 123.1, 122.3, 112.4, 112.0, 80.0, 74.2, 63.1, 63.0, 62.7, 62.0, 61.7, 13.9, 13.8, 13.3; IR (KBr):  $\gamma$  3331, 2926, 2852, 1732, 1663, 1617, 1469, 1449, 1361, 1294, 1252, 1184, 1130, 1031, 857, 789, 762  $\text{cm}^{-1}$ ; ESI FTMS exact mass calcd for  $(\text{C}_{24}\text{H}_{25}\text{F}_3\text{N}_2\text{O}_9+\text{Na})^+$  requires  $m/z$  565.1404, found  $m/z$  565.1420.

**Tetraethyl 7-bromo-2-oxospiro[indoline-3,2'-pyrrole]-3',4',5',5'(1'H)-tetracarboxylate (4vab):**

(Flash column chromatography eluent, petroleum ether/ ethyl acetate = 3/1); Reaction time = 36 h; Yield: 65%; Light yellow solid; m.p. 191-193  $^\circ\text{C}$ ;  $^1\text{H}$  NMR (400 MHz,  $\text{CDCl}_3$ )  $\delta$  (ppm) : 7.58 (s, 1H), 7.39 – 7.37 (m, 2H), 6.95 (dd,  $J = 8.2, 7.5$  Hz, 1H), 4.37 – 4.28 (m, 6H), 4.13 – 3.93 (m, 2H), 3.79 (s, 1H), 1.37 – 1.30 (m, 9H), 1.01 (t,  $J = 7.1$  Hz, 3H);  $^{13}\text{C}$  NMR (100 MHz,  $\text{CDCl}_3$ )  $\delta$  (ppm): 174.9, 168.5, 167.8, 161.9, 160.3, 140.6, 140.4, 138.8, 132.7, 130.8, 124.5, 124.1, 102.9, 80.1, 76.5, 63.1, 62.9, 61.9, 61.7, 13.9, 13.9, 13.8, 13.4; IR (KBr):  $\gamma$  3349, 2968, 2913, 2859, 1739, 1647, 1610, 1494, 1443, 1297, 1249, 1130, 1035, 857, 804, 690  $\text{cm}^{-1}$ ; ESI FTMS exact mass calcd for  $(\text{C}_{23}\text{H}_{25}\text{BrN}_2\text{O}_9+\text{Na})^+$  requires  $m/z$  575.0636, found  $m/z$  575.0639.

### Cytotoxic evaluation of compounds 4 to mammary carcinoma cell line MCF7:

The cytotoxicity of the tested compounds to MCF7 cells was assayed using the CCK8 (Cell Counting Kit-8) method. MCF7 cells were seeded in 96-well plates at the density of  $10^4$  cells per well with 200  $\mu$ l of complete culture medium. After adhesion for 24 hours, the medium was change to 1640 supplemented without FBS and the compounds was added to the medium to final concentrations ranging from 1  $\mu$ g/ml to 100  $\mu$ g/ml. The cells were then cultured for another 24 h. Cells that did not exposed to compounds were used as controls and the wells to which only culture medium was added served as blanks. At the end of compounds stimulation, the supernatant was removed, and 100  $\mu$ l of 1640 medium containing 10  $\mu$ l of CCK8 was added to each well for another 3 h at 37°C. The culture plates were then shaken for 10 min and the optical density (OD) values were read at 450 nm. The inhibition rate was calculated according to the following formula: Inhibition rate =  $(OD_{450 \text{ control}} - OD_{450 \text{ sample}}) / OD_{450 \text{ control}} \times 100\%$ , where OD stands for optical density at 450 nm.

### References:

1. (a) B. M. Trost, Y. Zhang, *J. Am. Chem. Soc.* **2007**, *129*, 14548; (b) C. Marti, E. M. Carreira, *J. Am. Chem. Soc.* **2005**, *127*, 11505; (c) Z. Liu, P. Gu, M. Shi, P. McDowell, G. Li, *Org. Lett.* **2011**, *13*, 2314; (d) M. G. Bursavich, A. M. Gilbert, S. Lombardi, K. E. Georgiadis, E. Reifenberg, C. R. Flannery, E. A. Morris, *Bioorg. Med. Chem. Lett.* **2007**, *17*, 5630; (e) F. Da Settimo, G. Primofiore, A. Da Settimo, C. La Motta, F. Simorini, E. Novellino, G. Greco, A. Lavecchia, E. Boldrini, *J. Med. Chem.* **2003**, *46*, 1419; (f) K. Aikawa, S. Mimura, Y. Numata, K. Mikami, *Eur. J. Org. Chem.* **2011**, 62; (g) S.-H. Cao, X.-C. Zhang, Y. Wei, M. Shi, *Eur. J. Org. Chem.* **2011**, 2668; (h) F. Shi, Z.-L. Tao, S.-W. Luo, S.-J. Tu, L.-Z. Gong, *Chem. Eur. J.* **2012**, *18*, 6885.

### X-ray single crystal data for 4aaa:

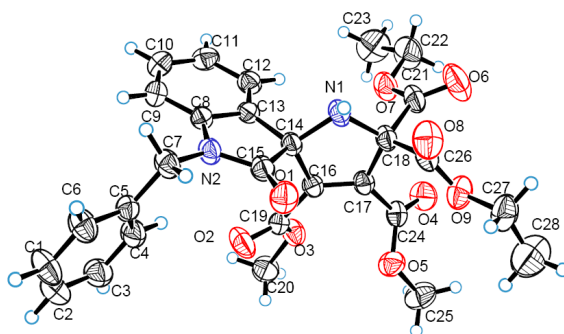

---

|                                                     |                                                                                                                                                                          |
|-----------------------------------------------------|--------------------------------------------------------------------------------------------------------------------------------------------------------------------------|
| Empirical formula                                   | C <sub>28</sub> H <sub>28</sub> O <sub>9</sub> N <sub>2</sub>                                                                                                            |
| Formula weight                                      | 536.52                                                                                                                                                                   |
| Temperature                                         | 295(2) K                                                                                                                                                                 |
| Crystal system                                      | Monoclinic                                                                                                                                                               |
| Space group                                         | P2 <sub>1</sub> /c                                                                                                                                                       |
| Unit cell dimensions                                | $a = 18.8356(3) \text{ \AA}$ $\alpha = 90.00^\circ$<br>$b = 9.57410(10) \text{ \AA}$ $\beta = 103.7800(10)^\circ$<br>$c = 15.4158(2) \text{ \AA}$ $\gamma = 90.00^\circ$ |
| Volume                                              | 2699.98(6) Å <sup>3</sup>                                                                                                                                                |
| Z                                                   | 4                                                                                                                                                                        |
| Density (calculated)                                | 1.320 mg/mm <sup>3</sup>                                                                                                                                                 |
| <i>F</i> (000)                                      | 1128                                                                                                                                                                     |
| Crystal size                                        | 0.40 × 0.32 × 0.30                                                                                                                                                       |
| Theta range for data collection                     | 4.83 to 62.72°                                                                                                                                                           |
| Index ranges                                        | -21 ≤ <i>h</i> ≤ 21, -11 ≤ <i>k</i> ≤ 10, -14 ≤ <i>l</i> ≤ 17                                                                                                            |
| Reflections collected                               | 11727                                                                                                                                                                    |
| Independent reflections                             | 4286[R(int) = 0.0228]                                                                                                                                                    |
| Data / restraints / parameters                      | 4286/15/361                                                                                                                                                              |
| Goodness-of-fit on <i>F</i> <sup>2</sup>            | 1.061                                                                                                                                                                    |
| Final <i>R</i> indices [ <i>I</i> > 2σ( <i>I</i> )] | <i>R</i> <sub>1</sub> = 0.0436, w <i>R</i> <sub>2</sub> = 0.1179                                                                                                         |
| <i>R</i> indices (all data)                         | <i>R</i> <sub>1</sub> = 0.0501, w <i>R</i> <sub>2</sub> = 0.1253                                                                                                         |
| Largest diff. peak and hole                         | 0.444/-0.379                                                                                                                                                             |

---



### <sup>1</sup>H and <sup>13</sup>C NMR spectra of products 4

4baa:

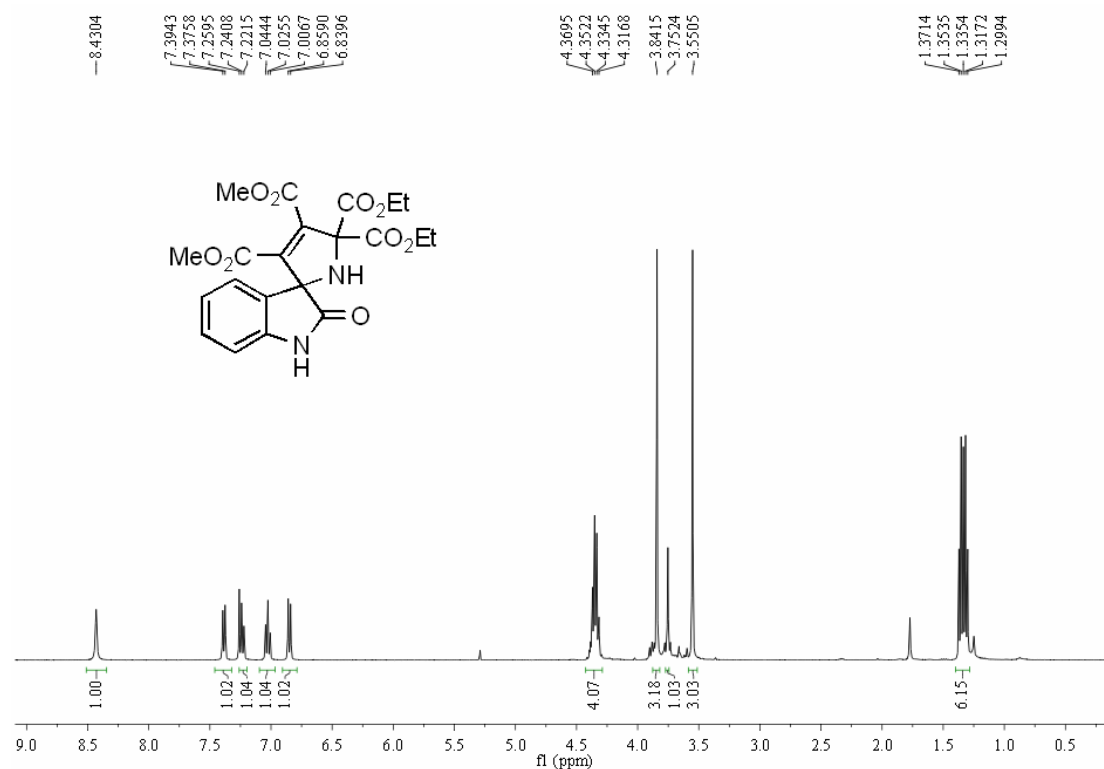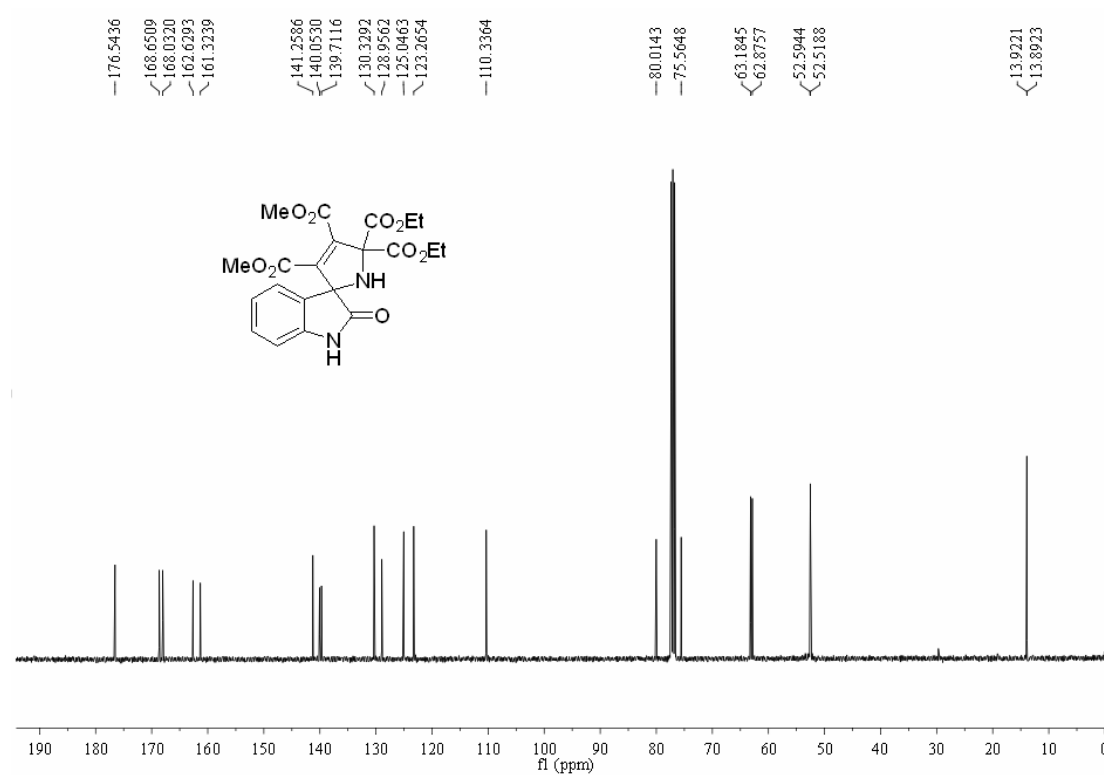

**4caa:**

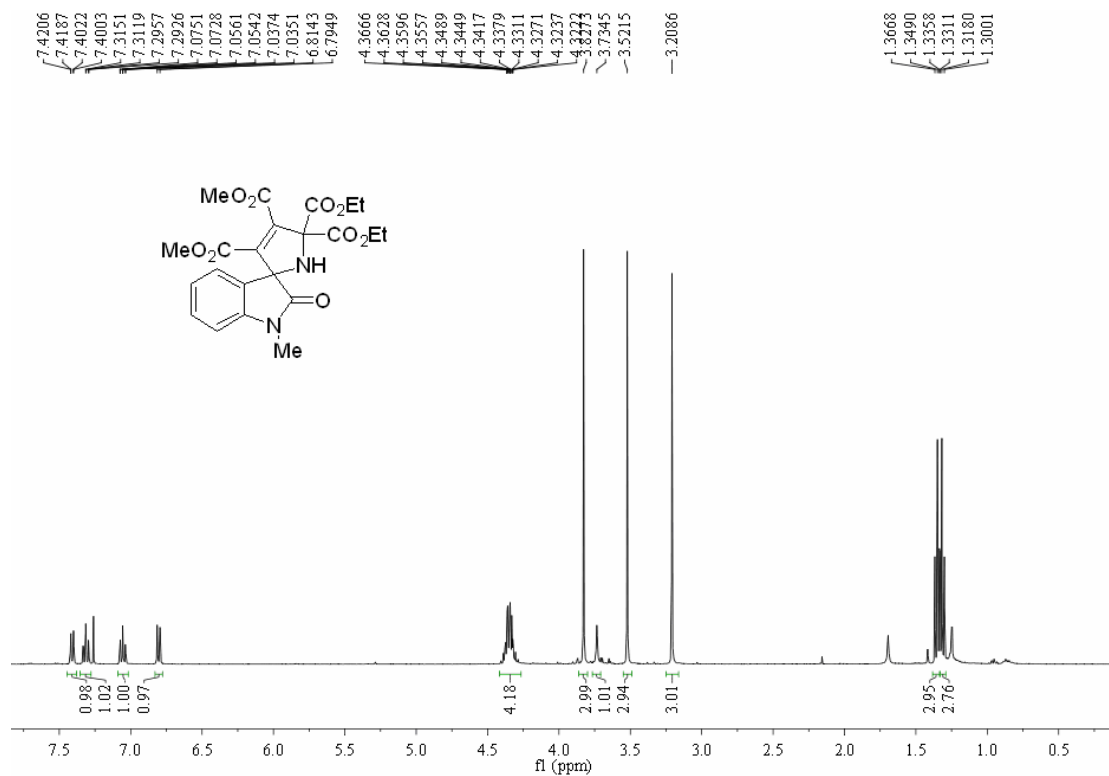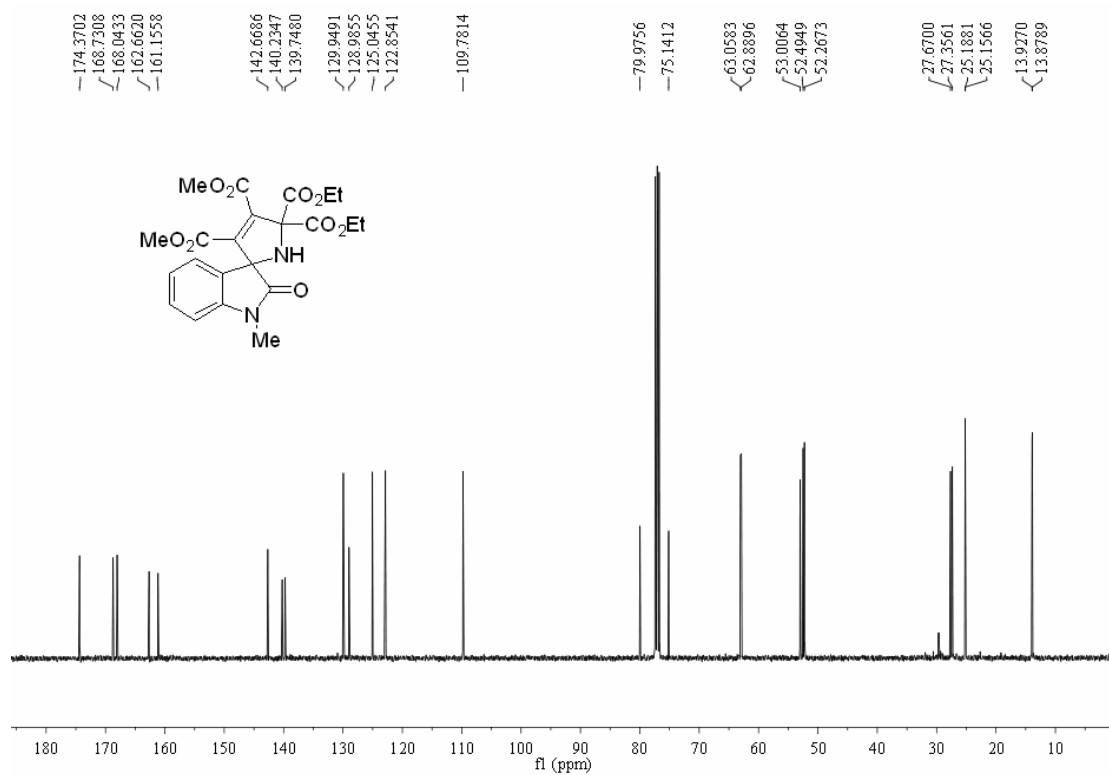

**4daa:**

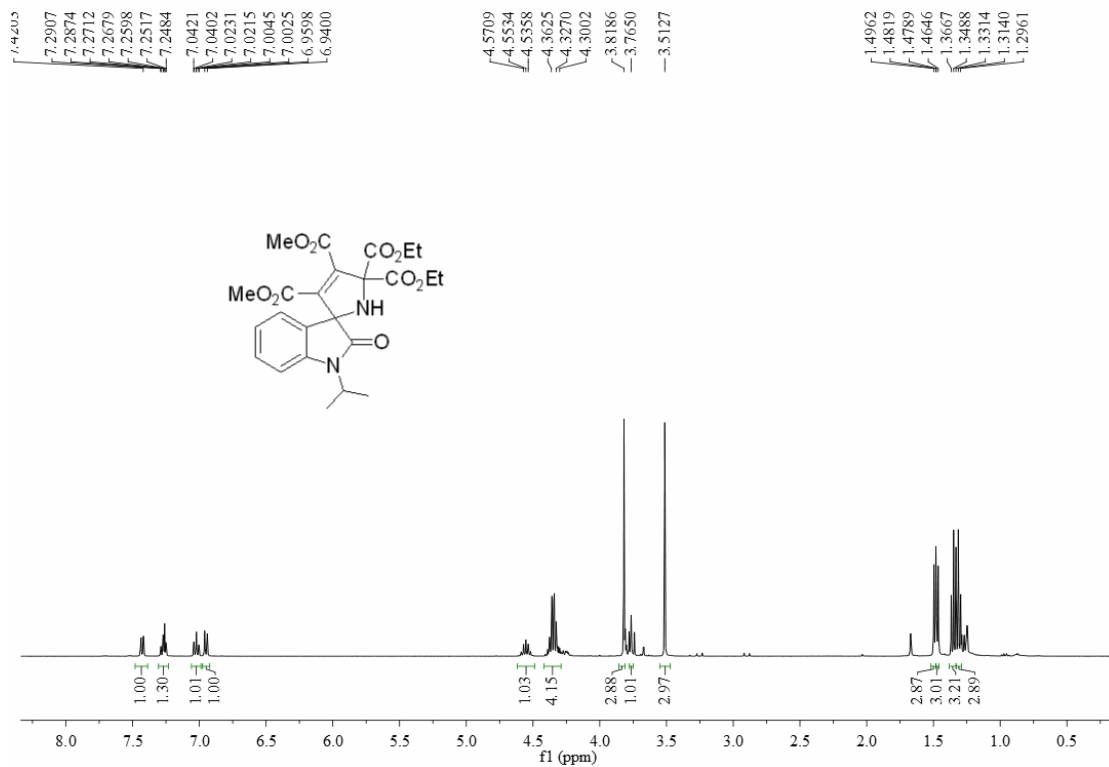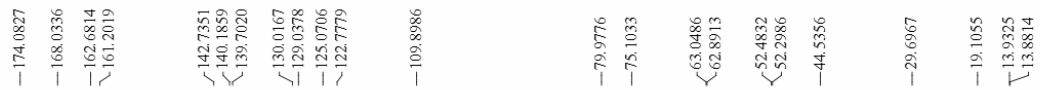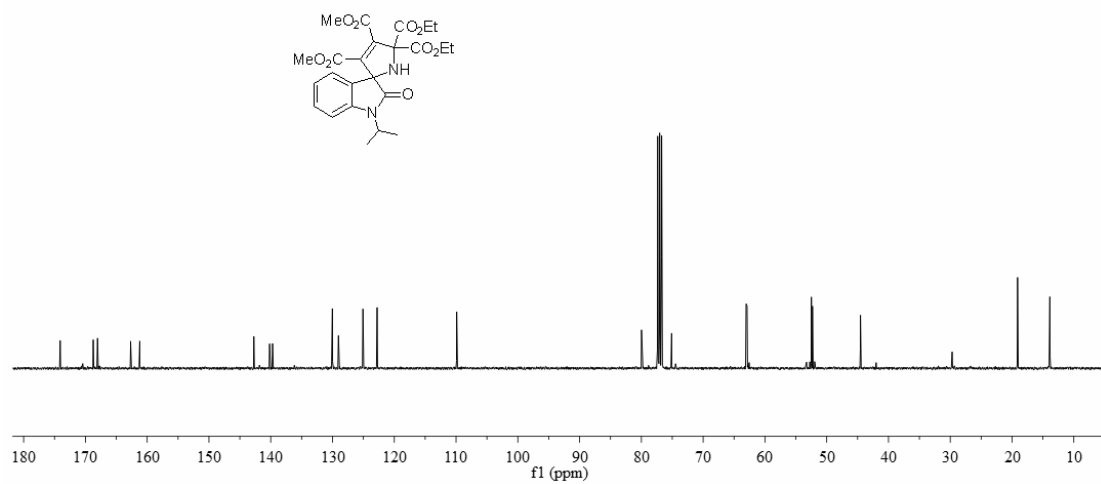

**4ea:**

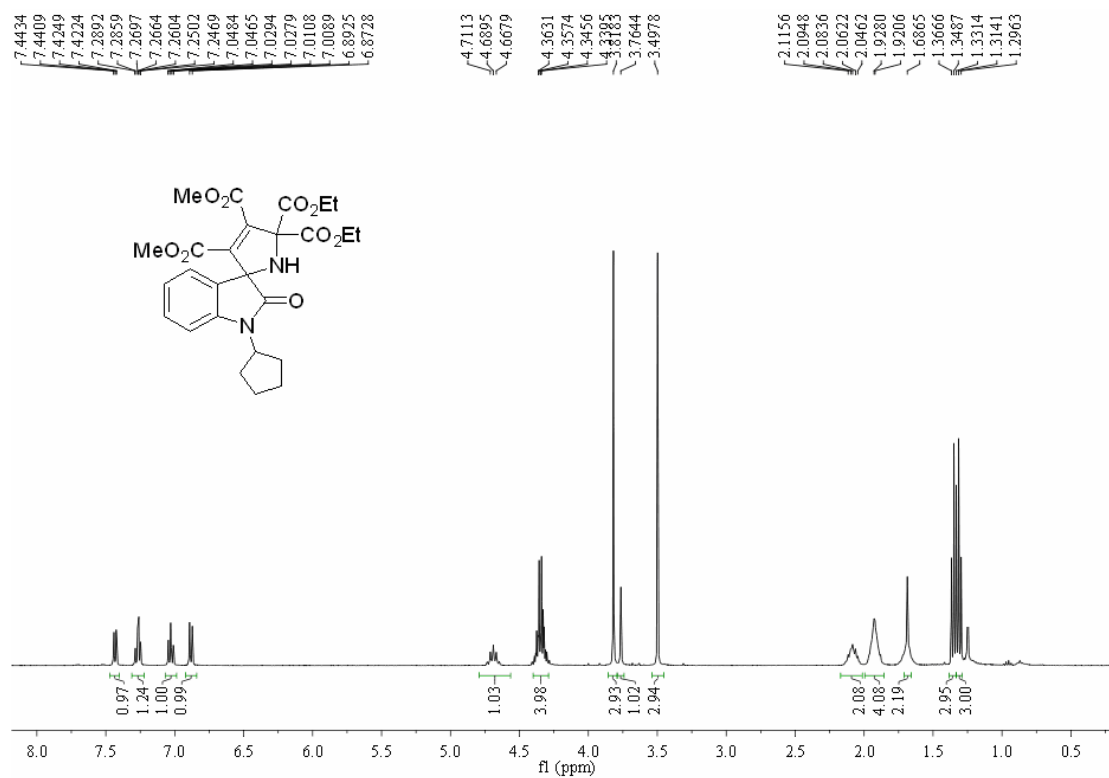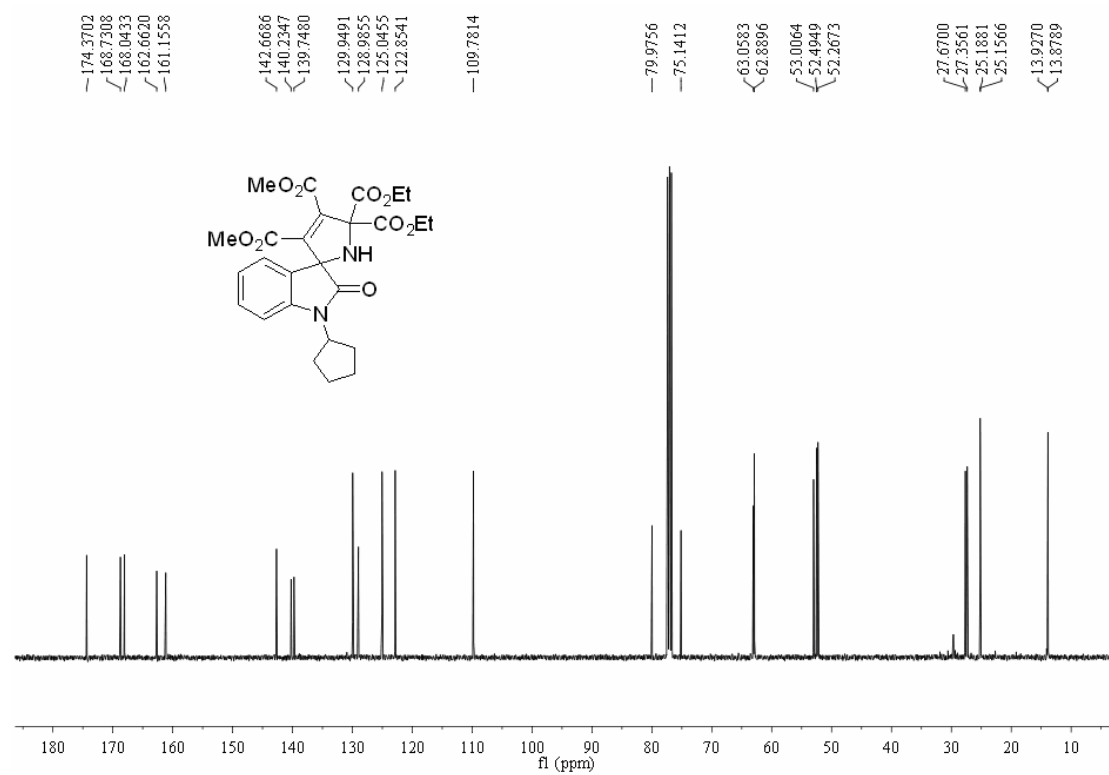

4faa:

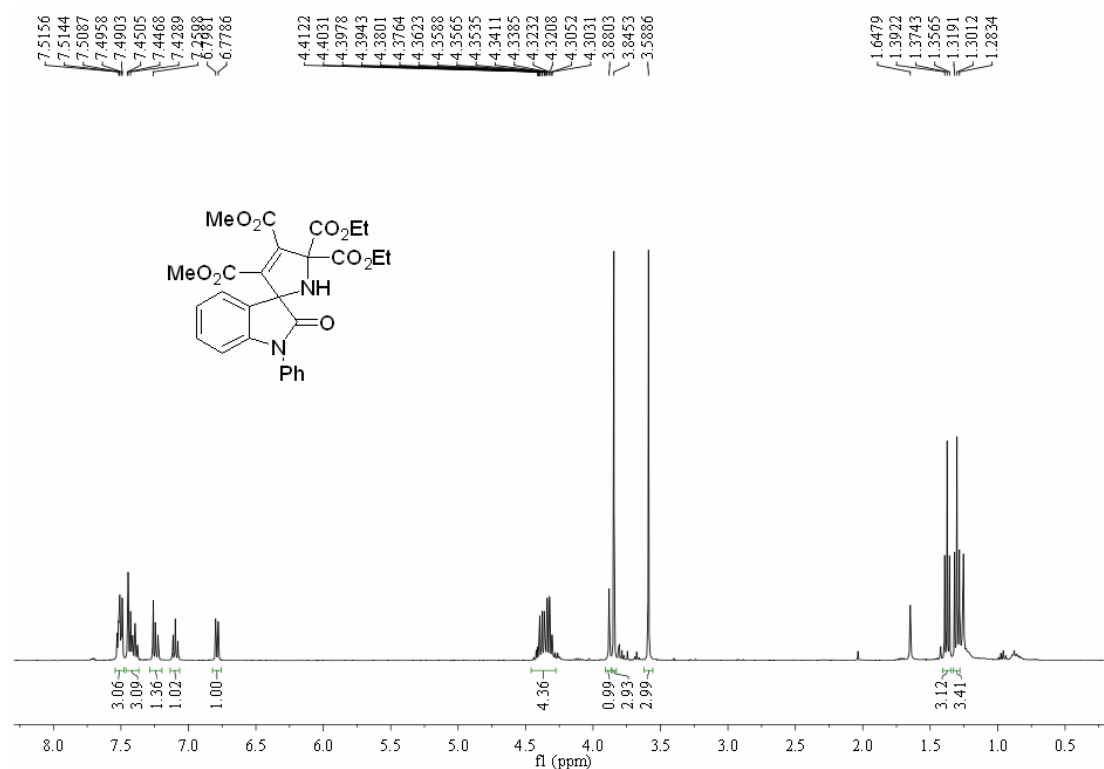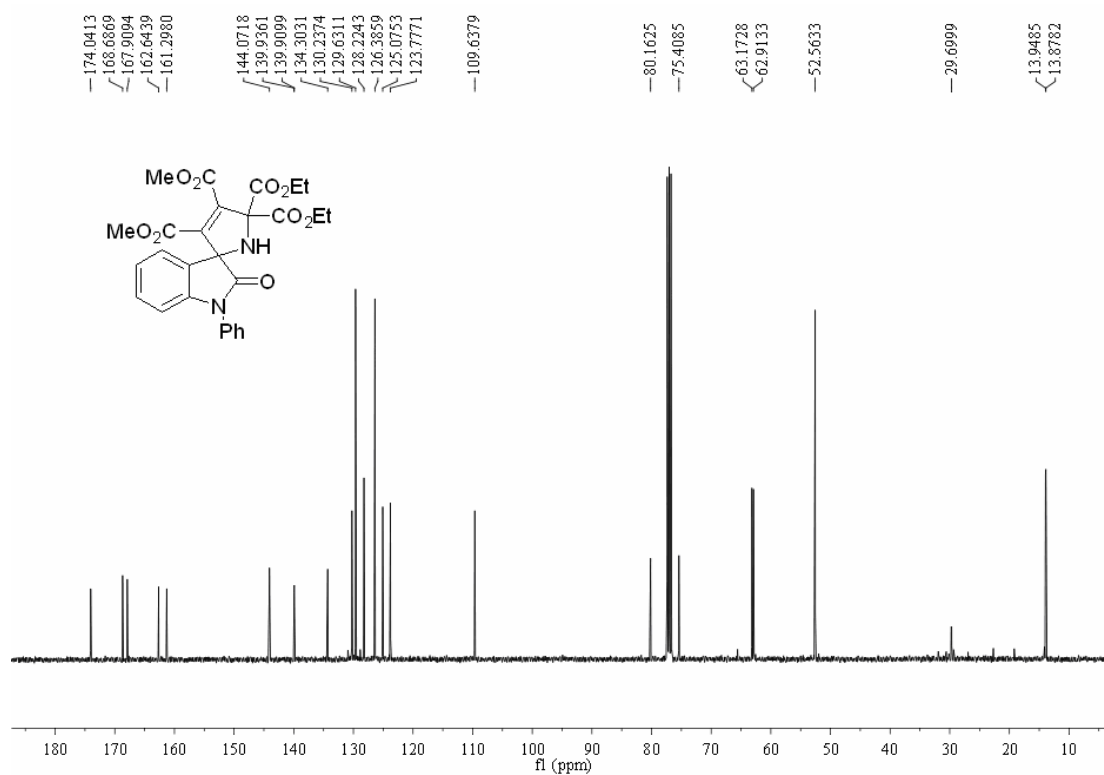

**4aaa:**

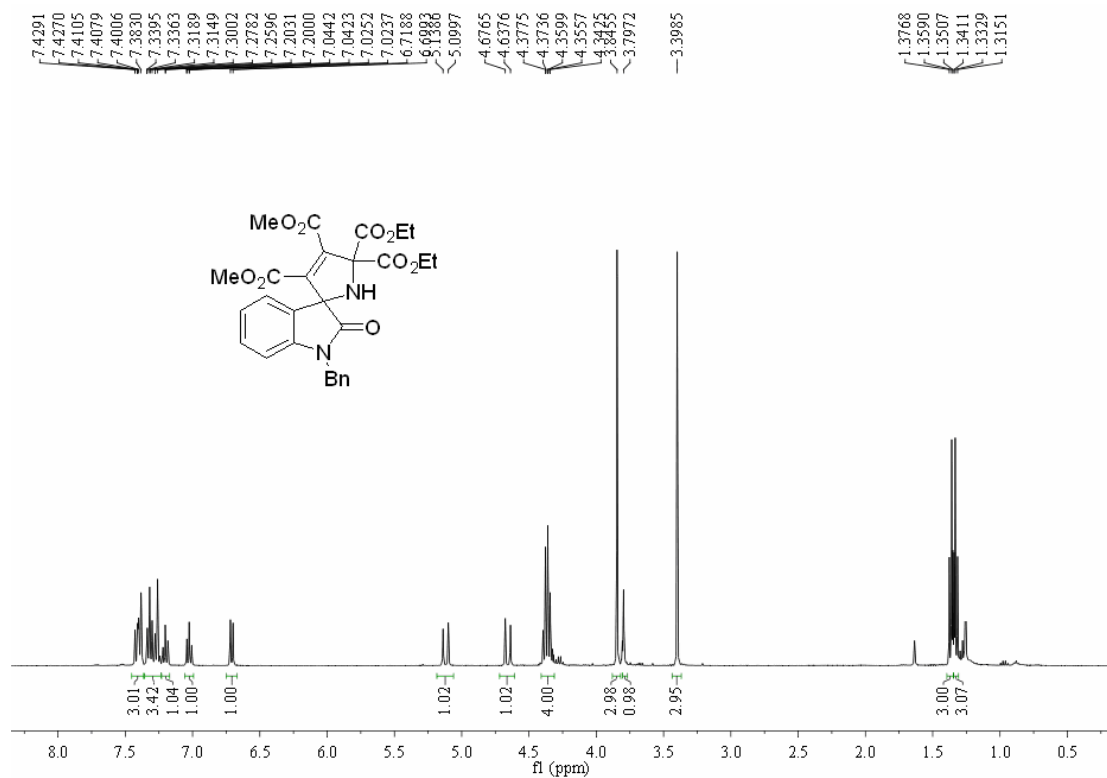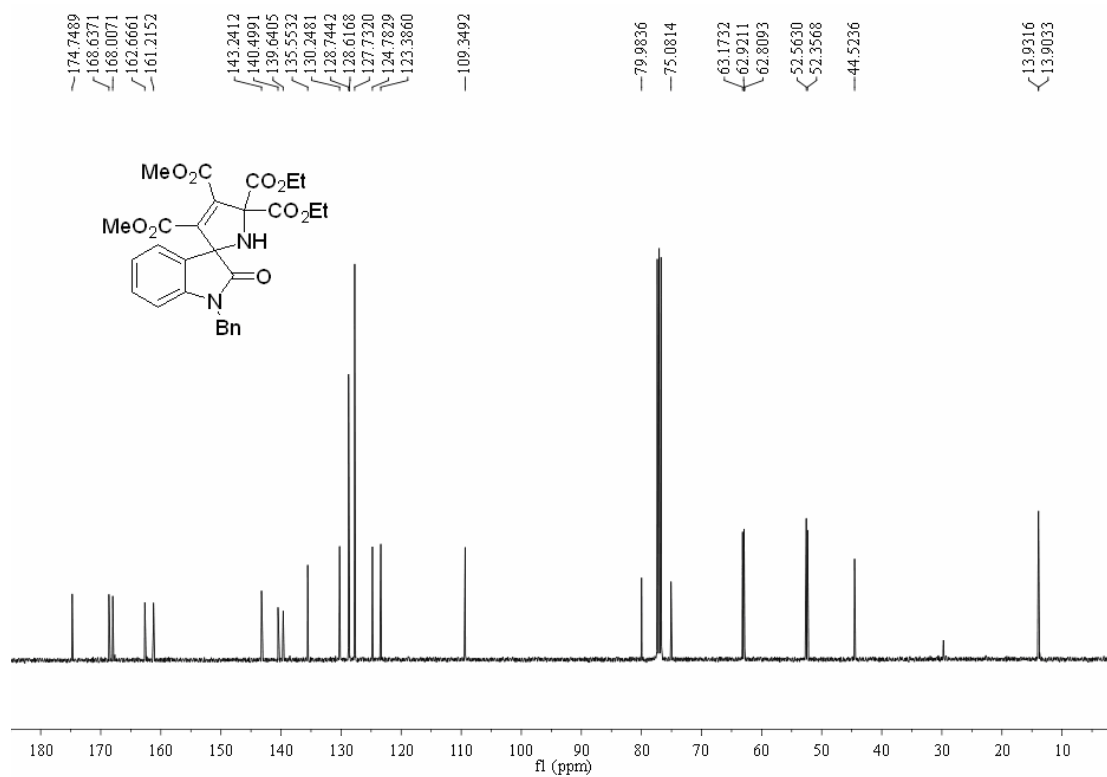

**4gaa:**

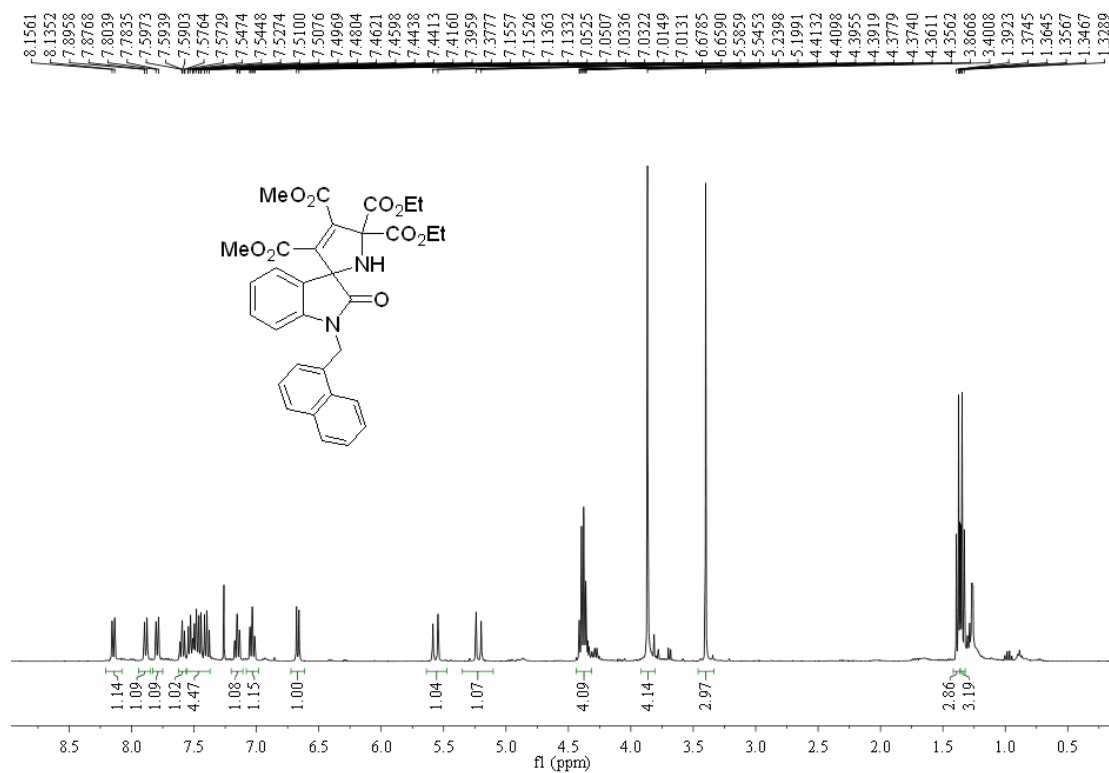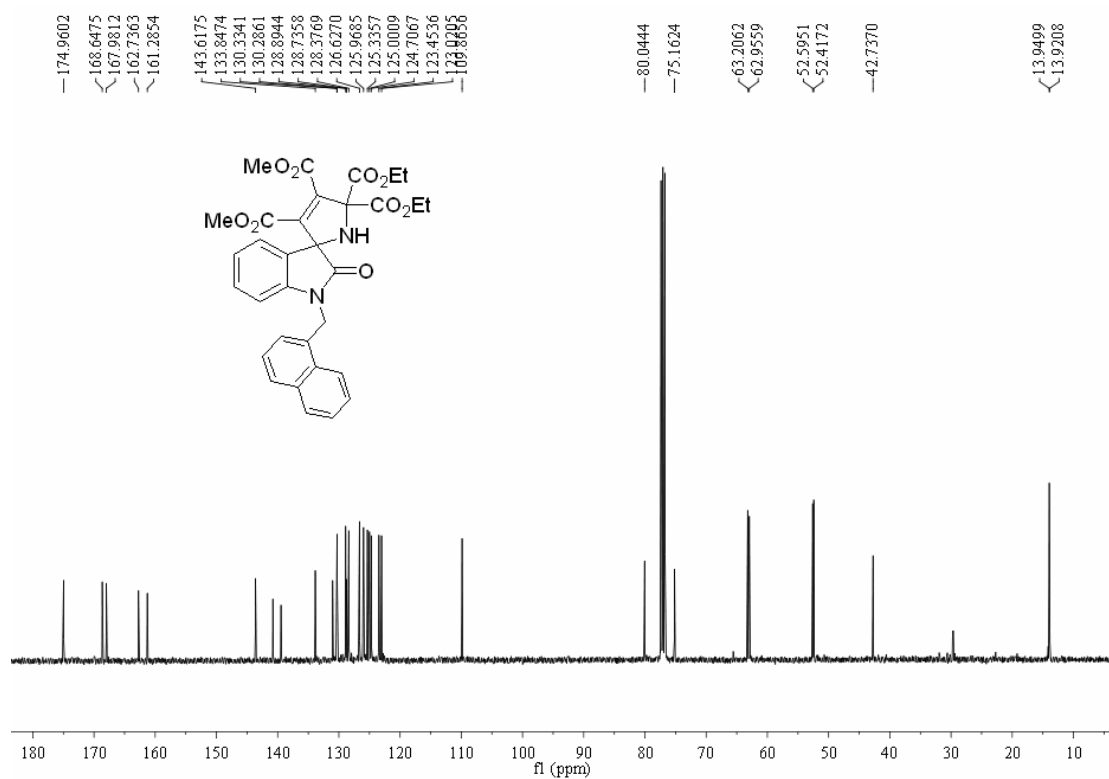

**4haa:**

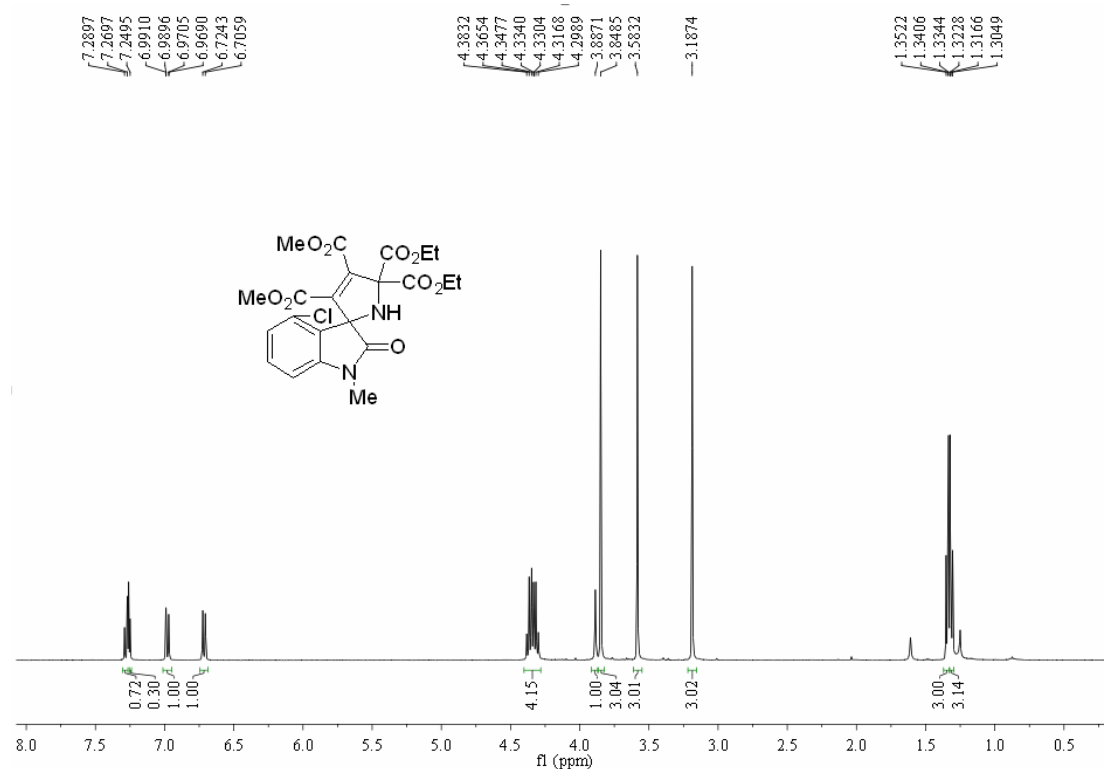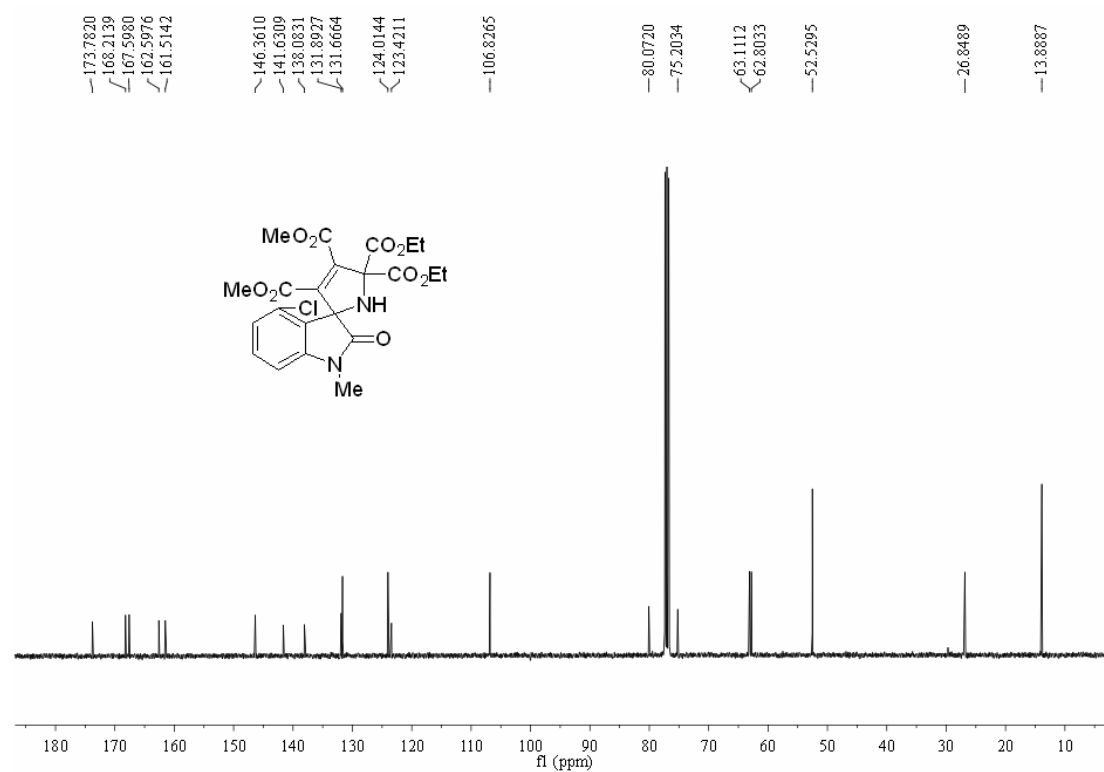



4iaa:

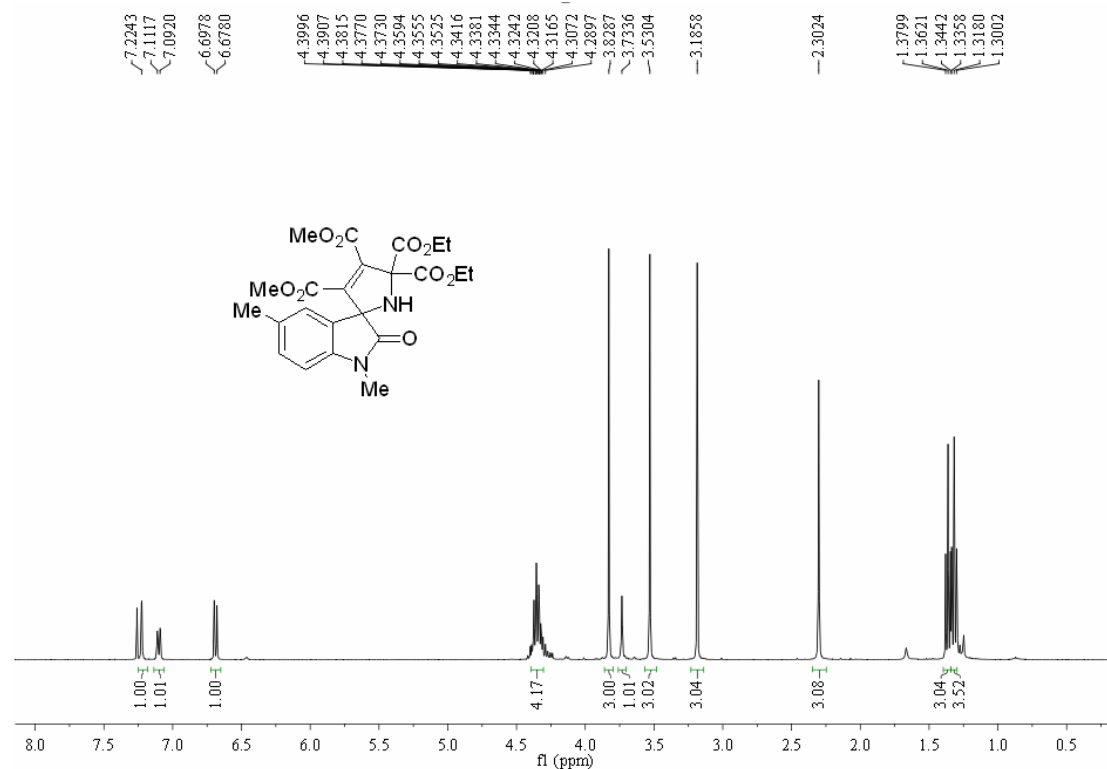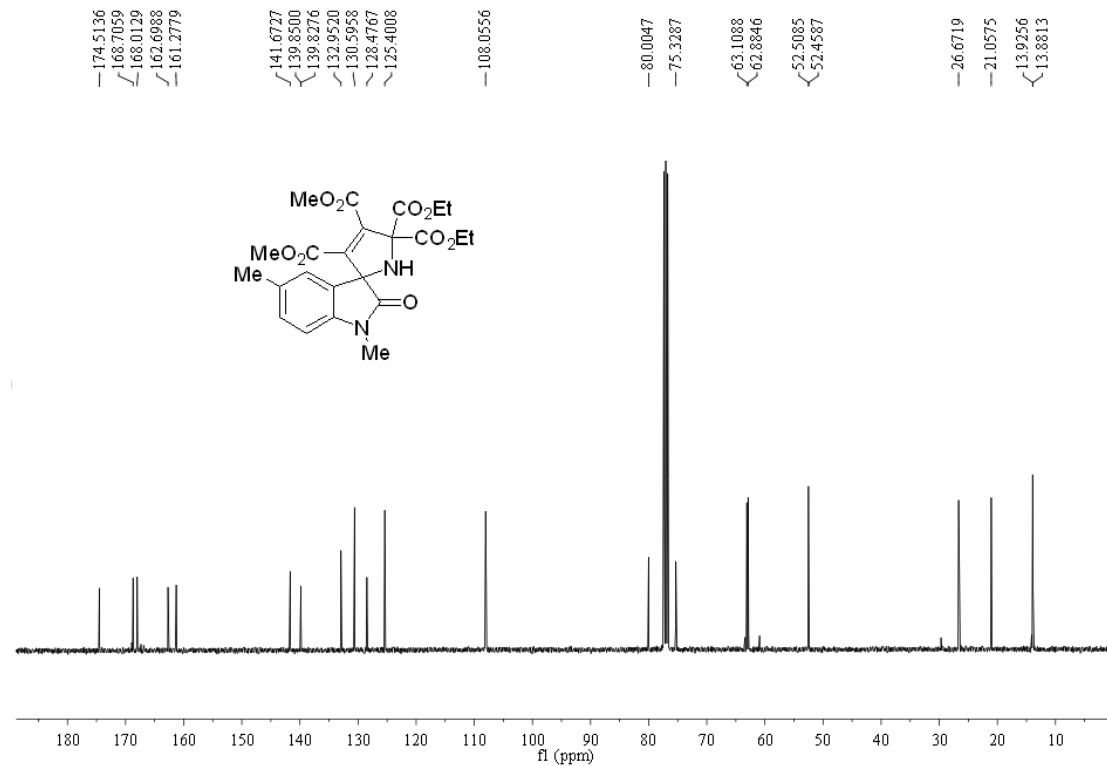

4jaa:

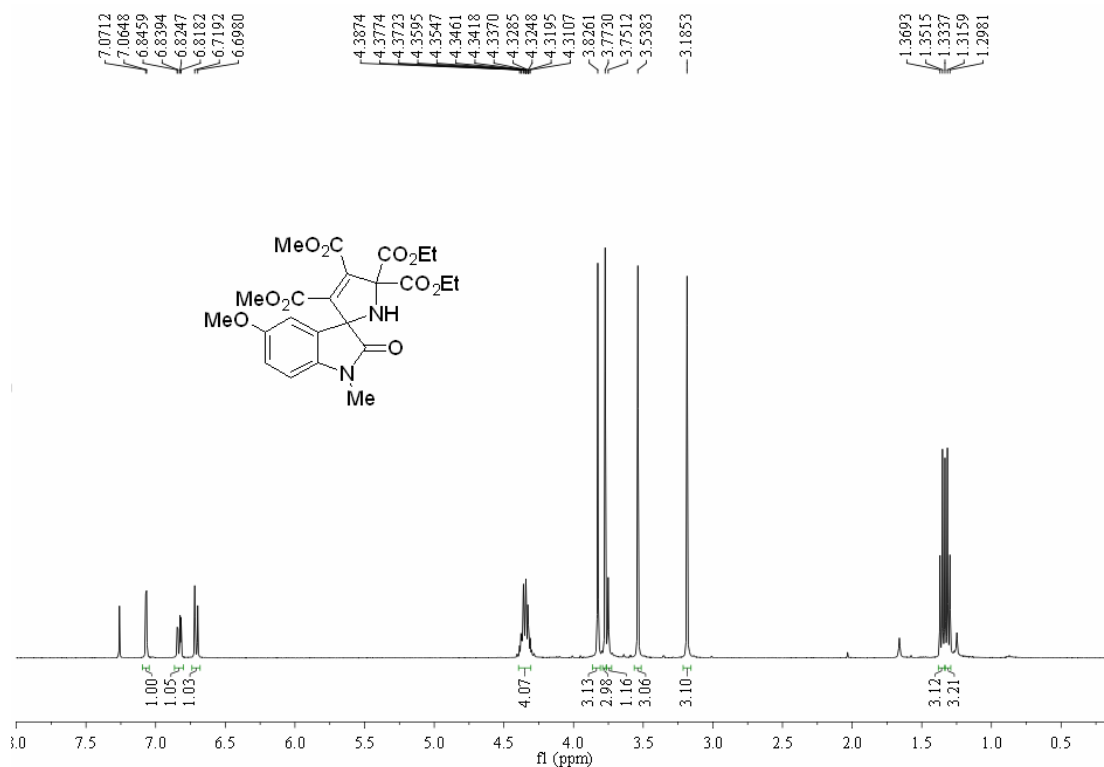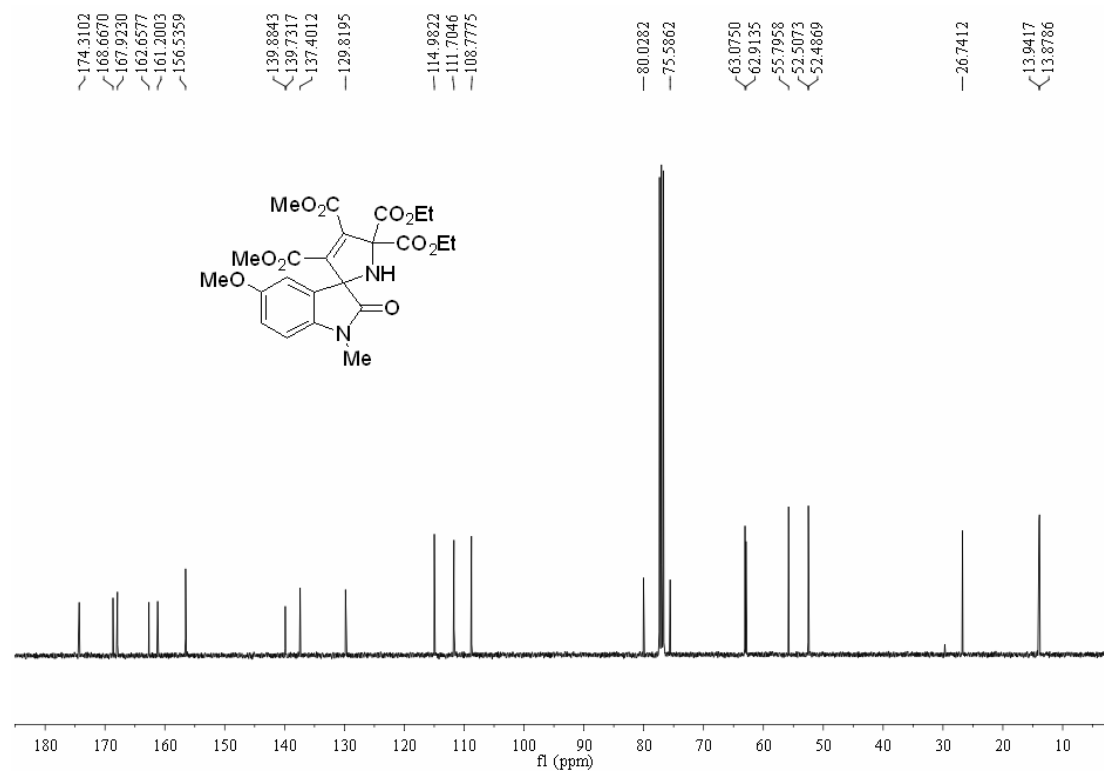

**4kaa:**

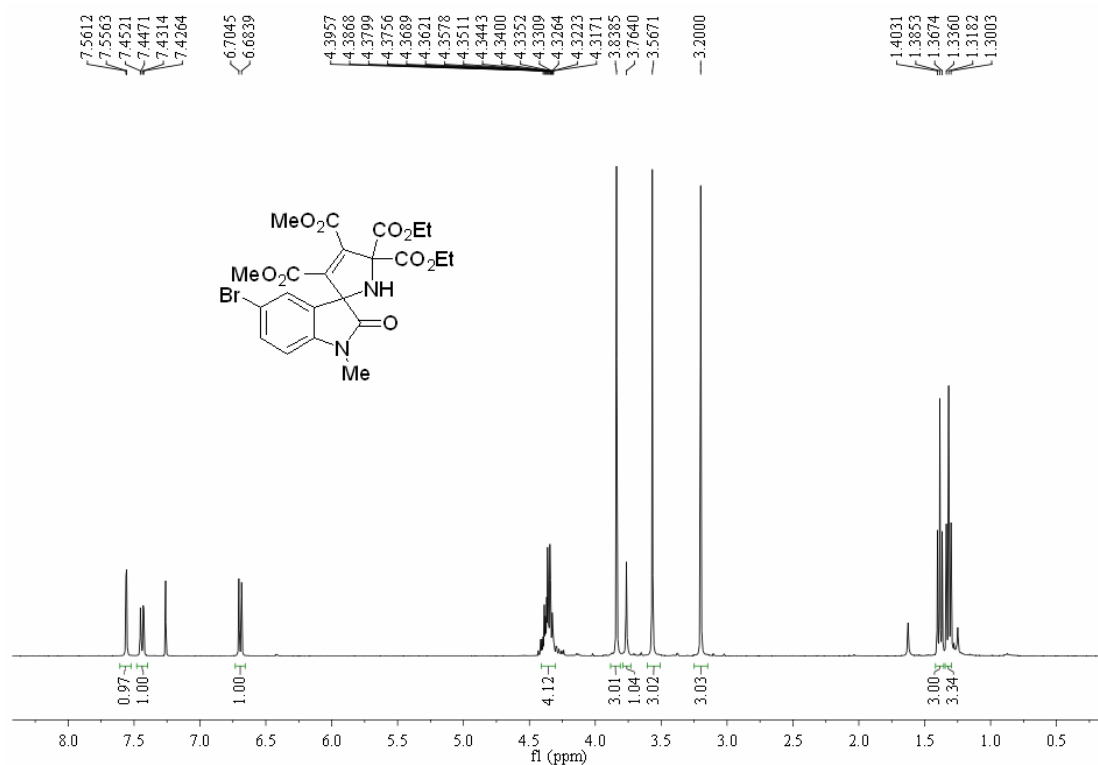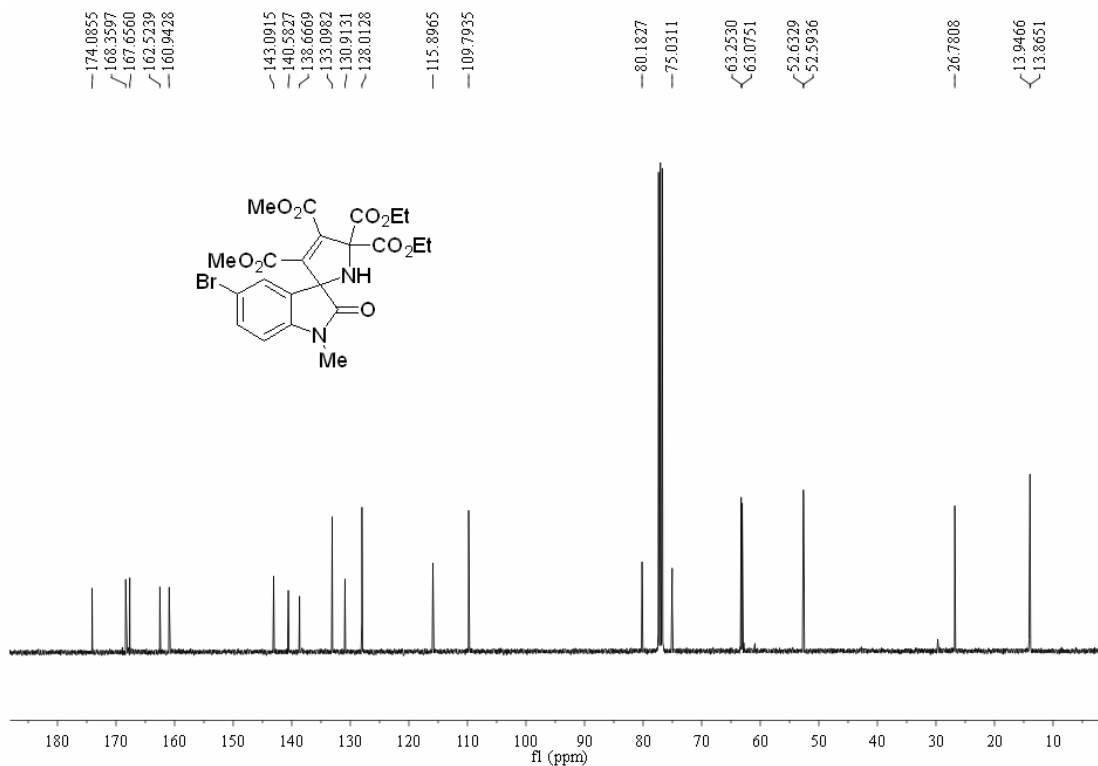

4laa:

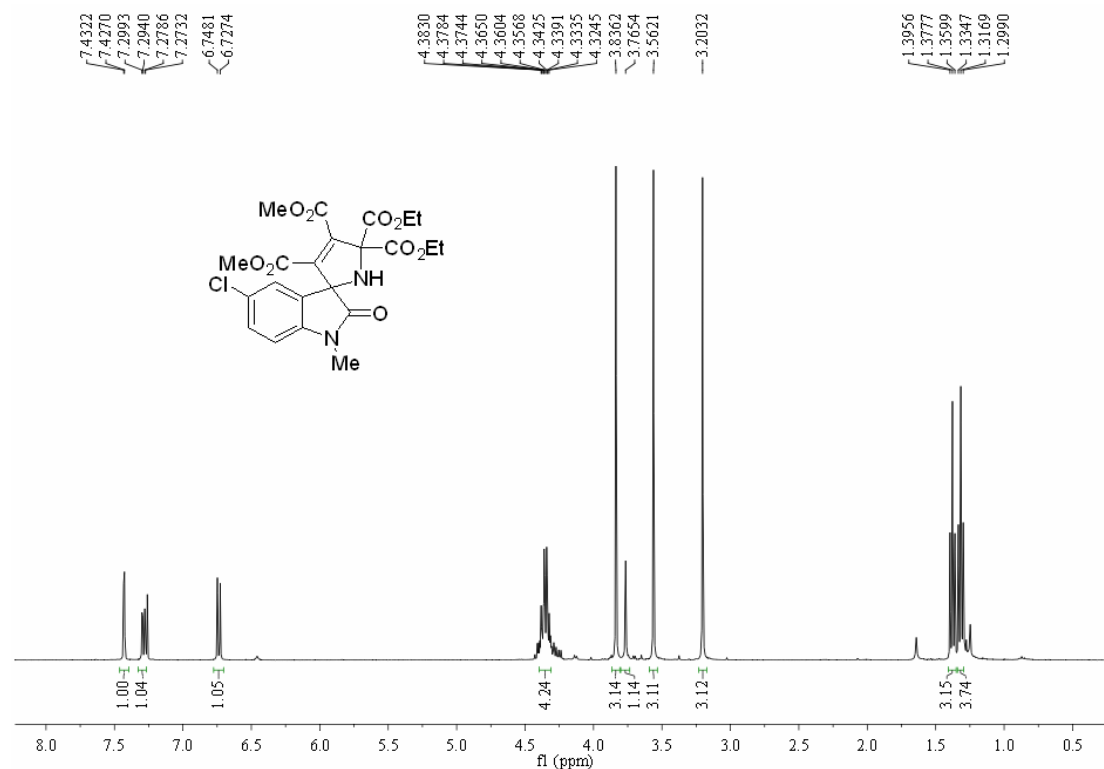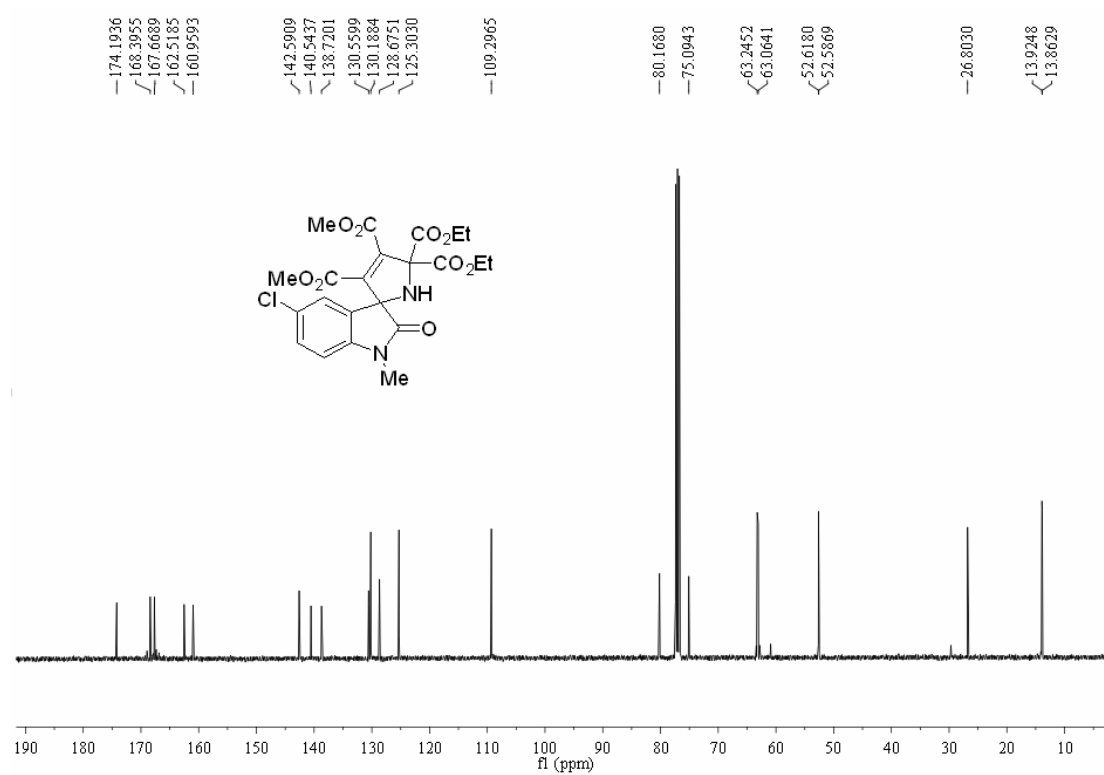

**4maa:**

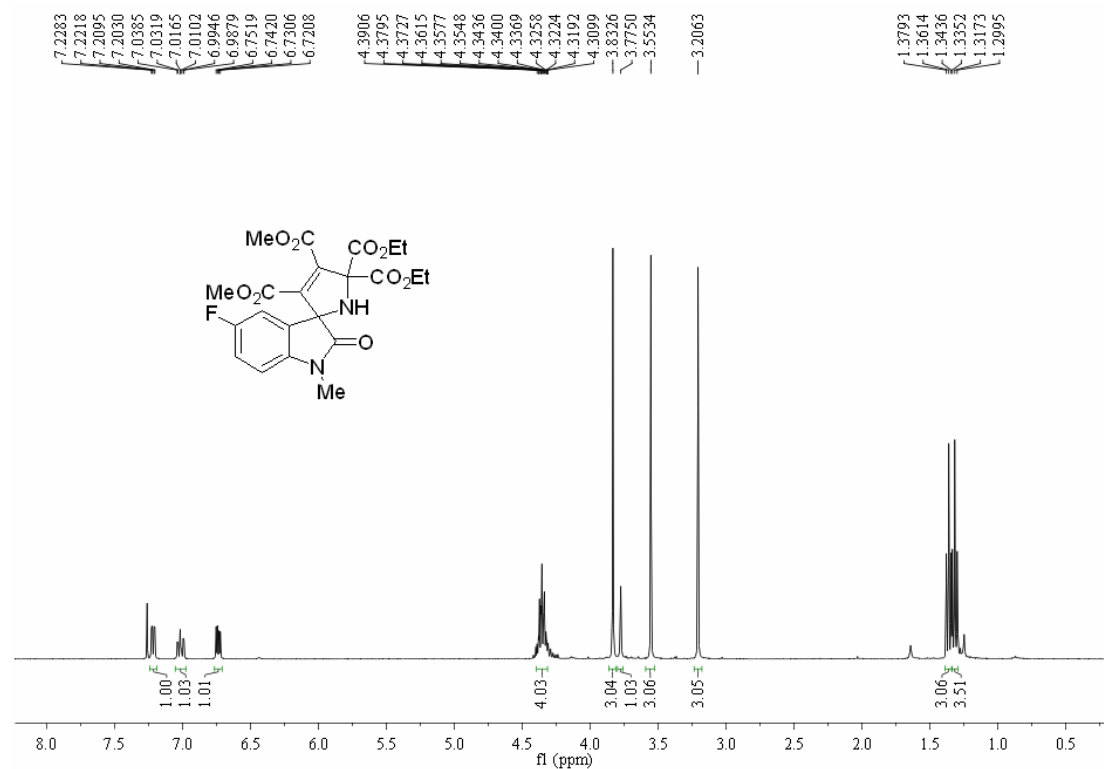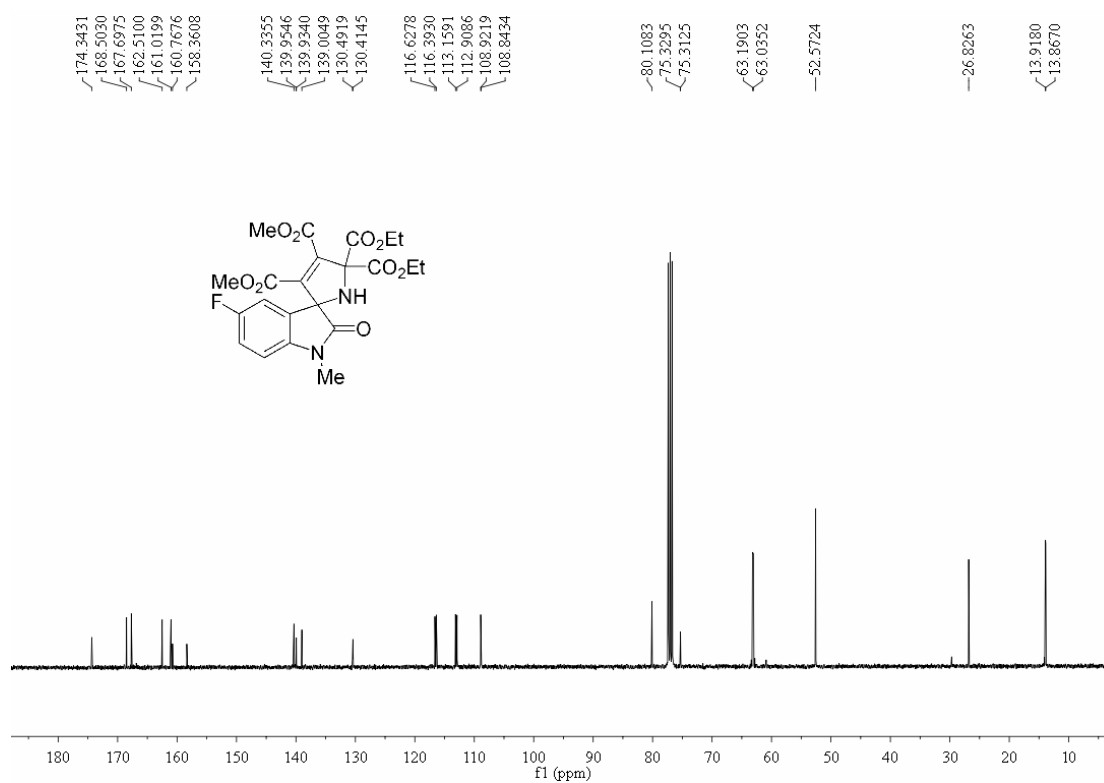

**4naa:**

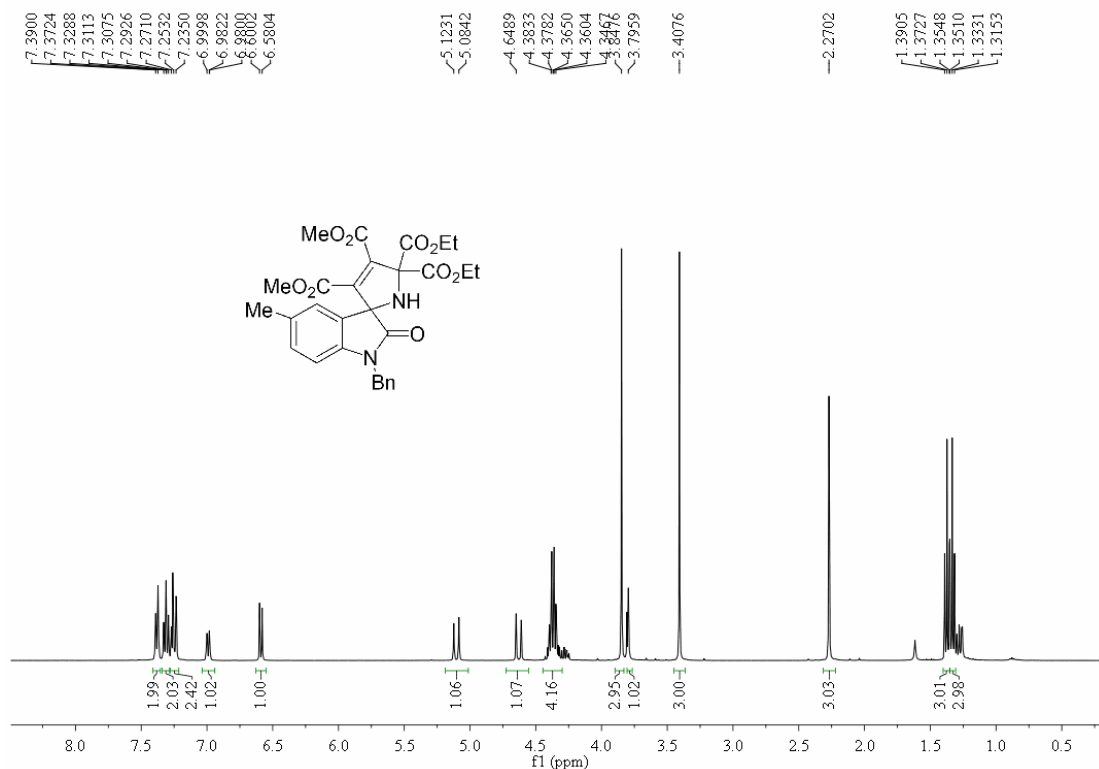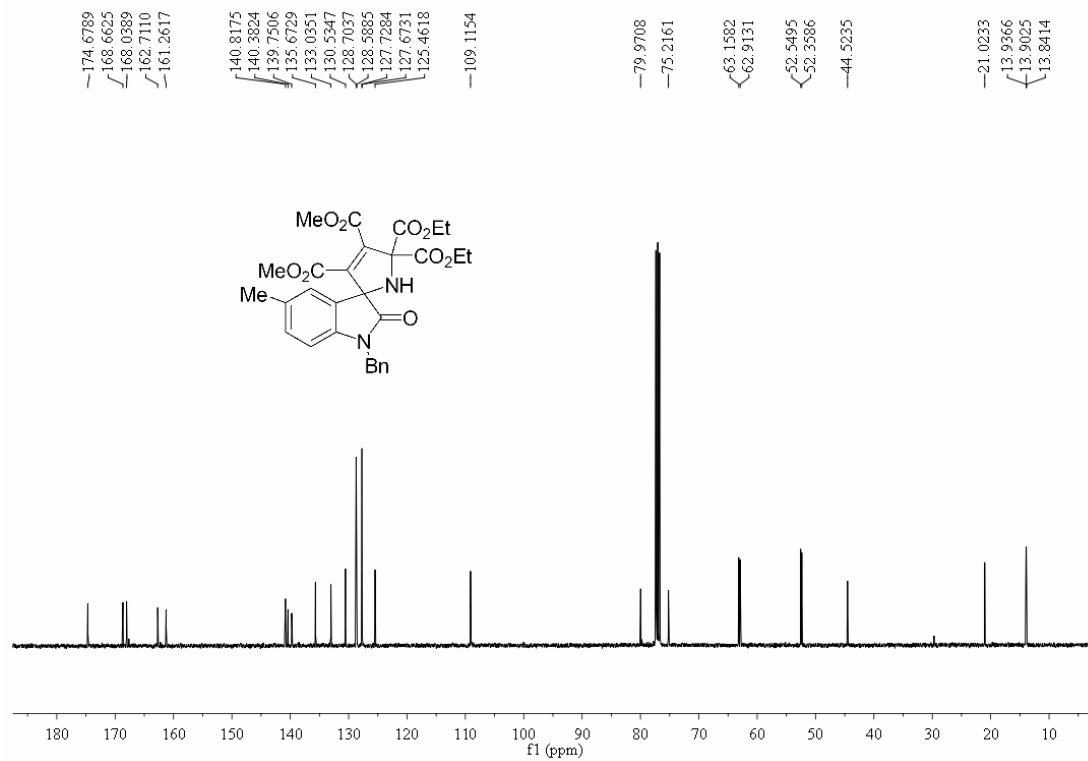

**40aa:**

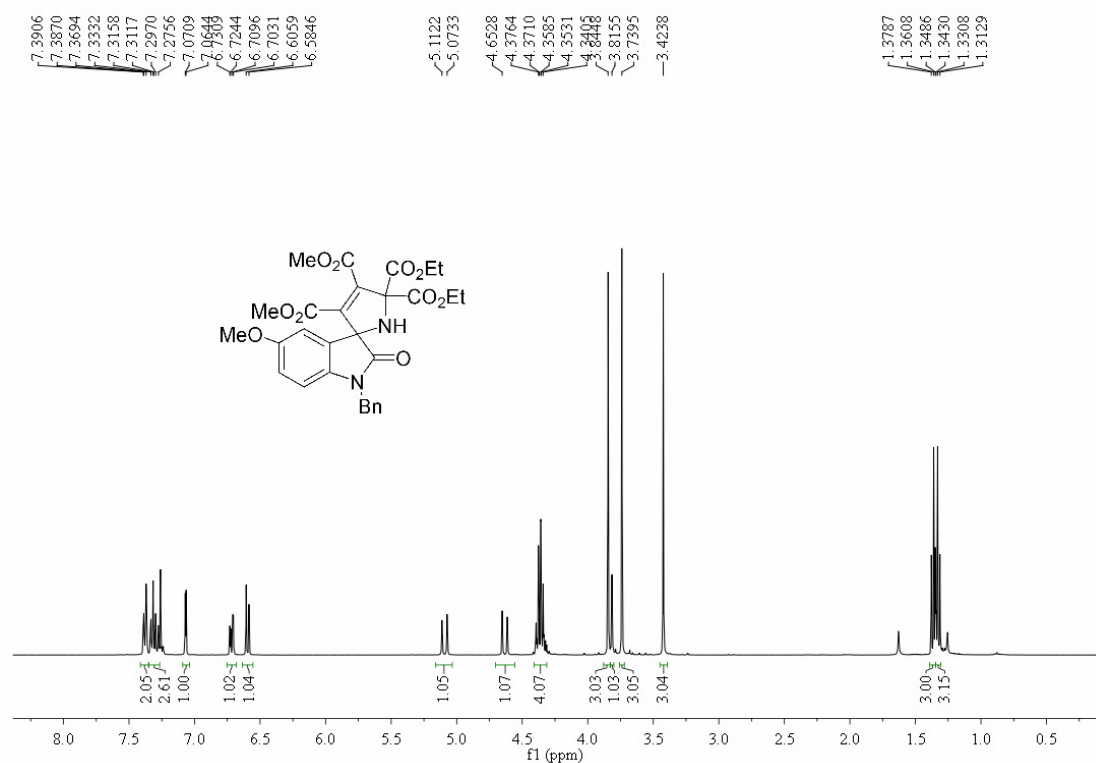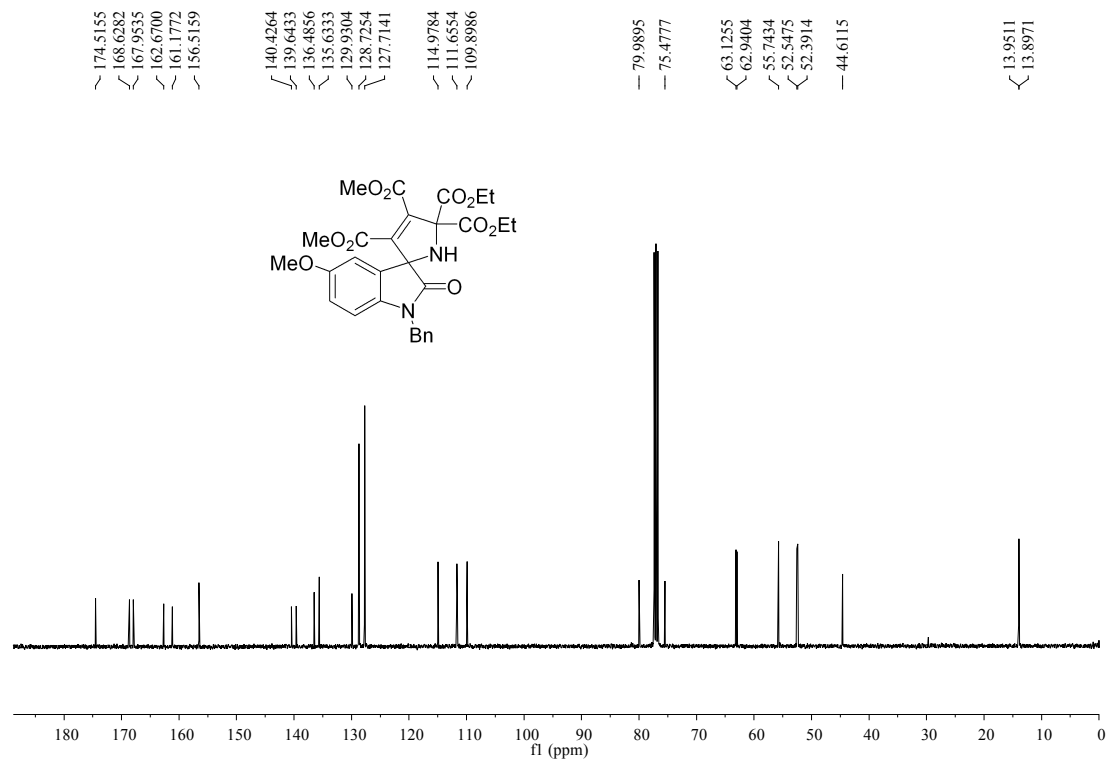

4paa:

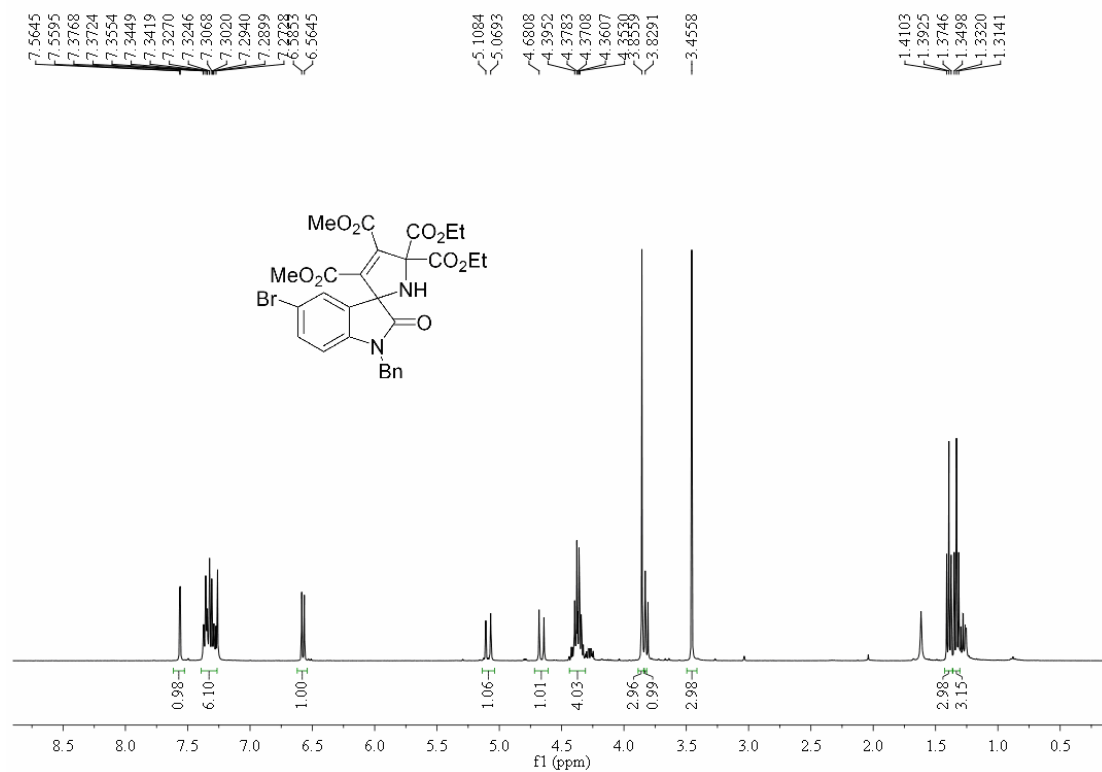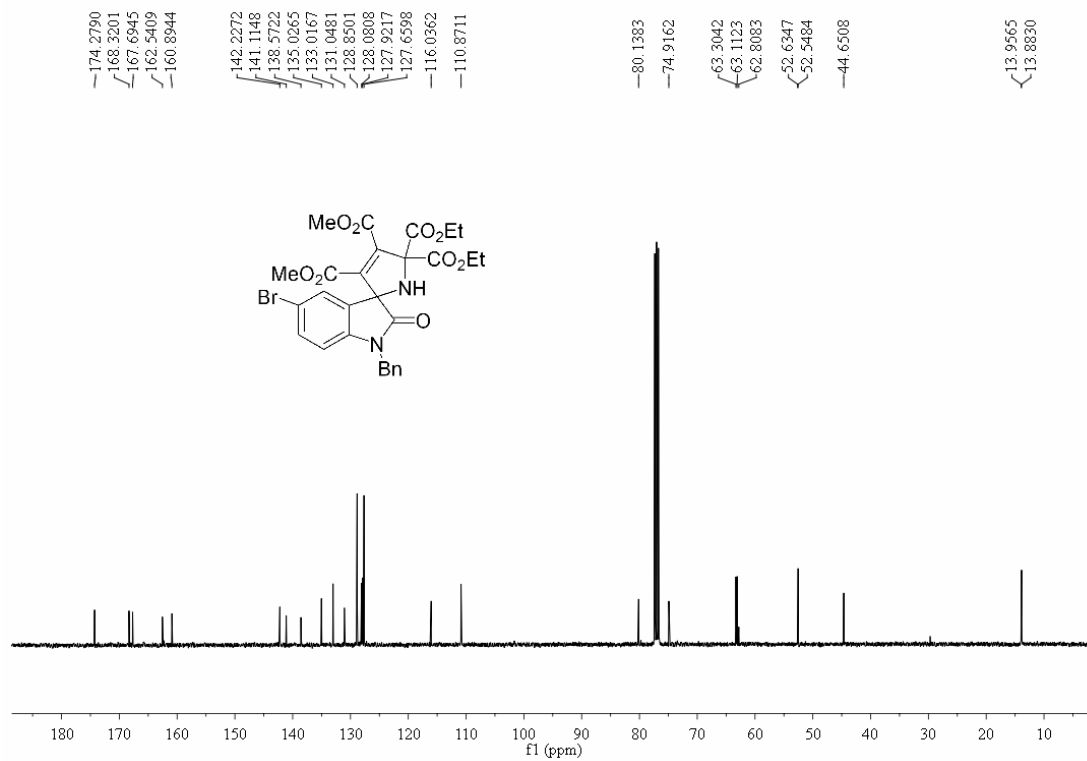



**4qaa:**

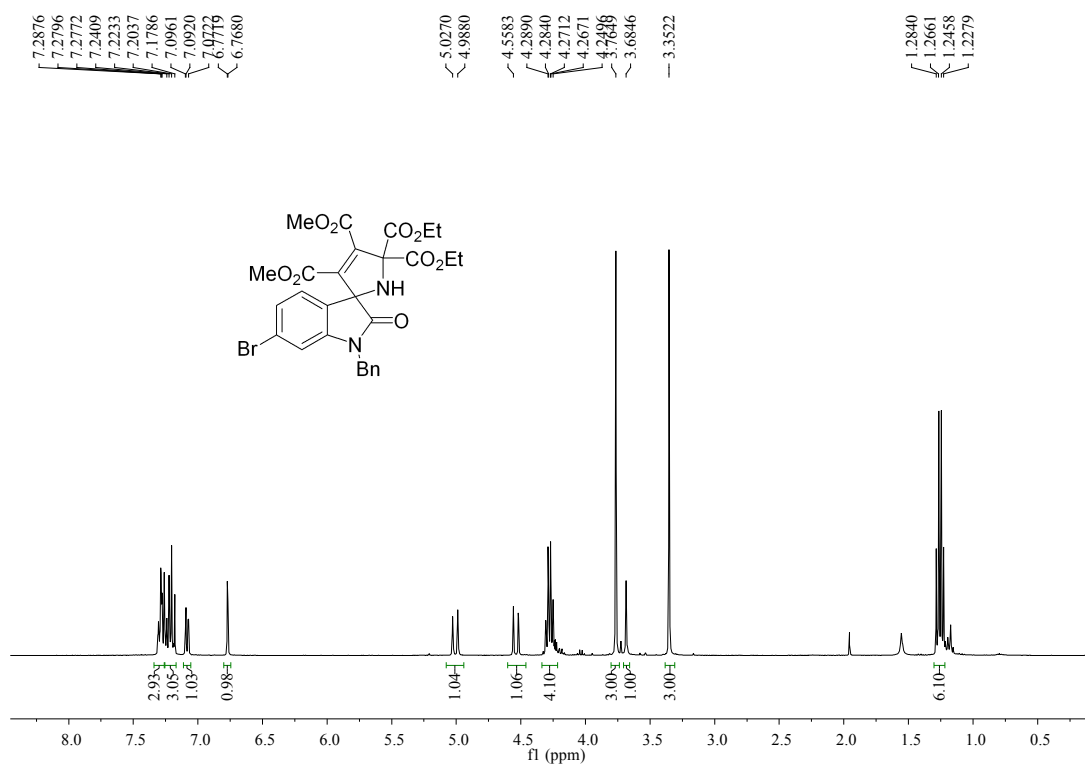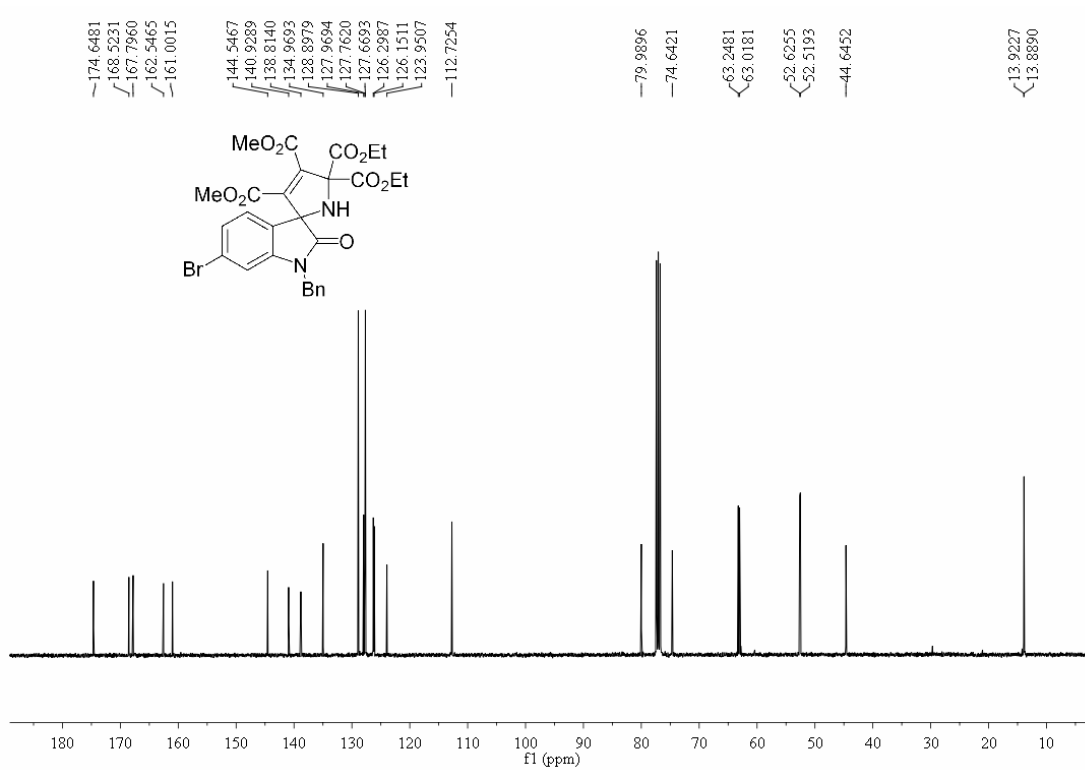

**4raa:**

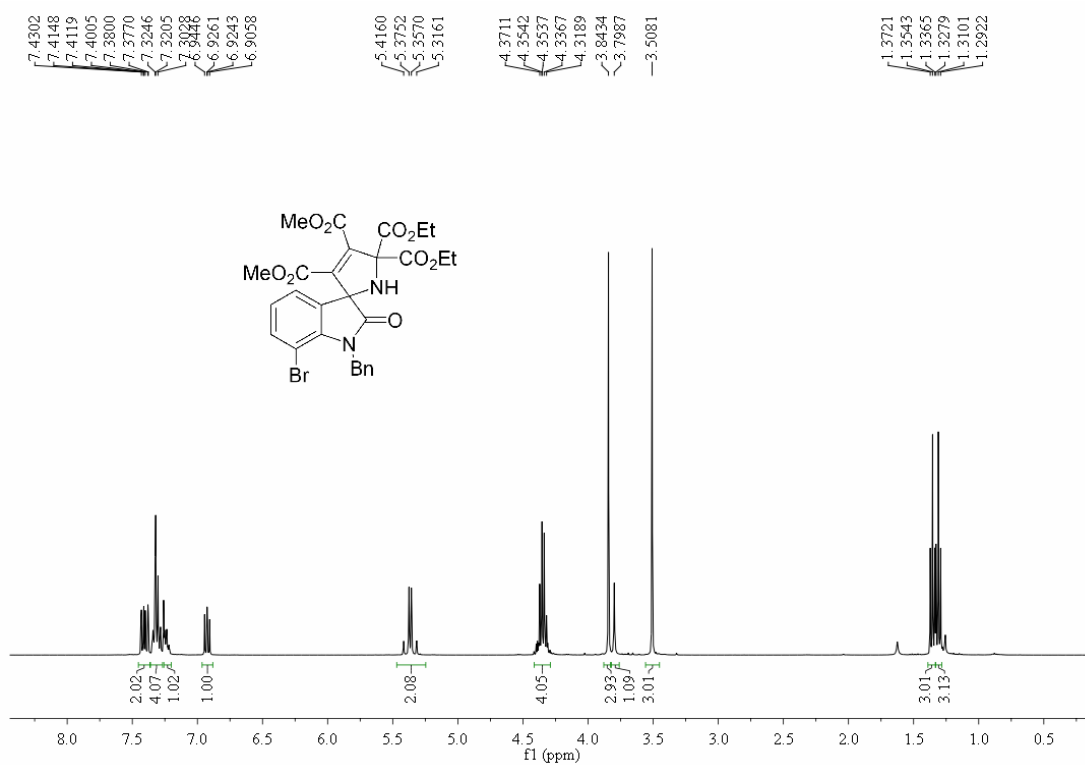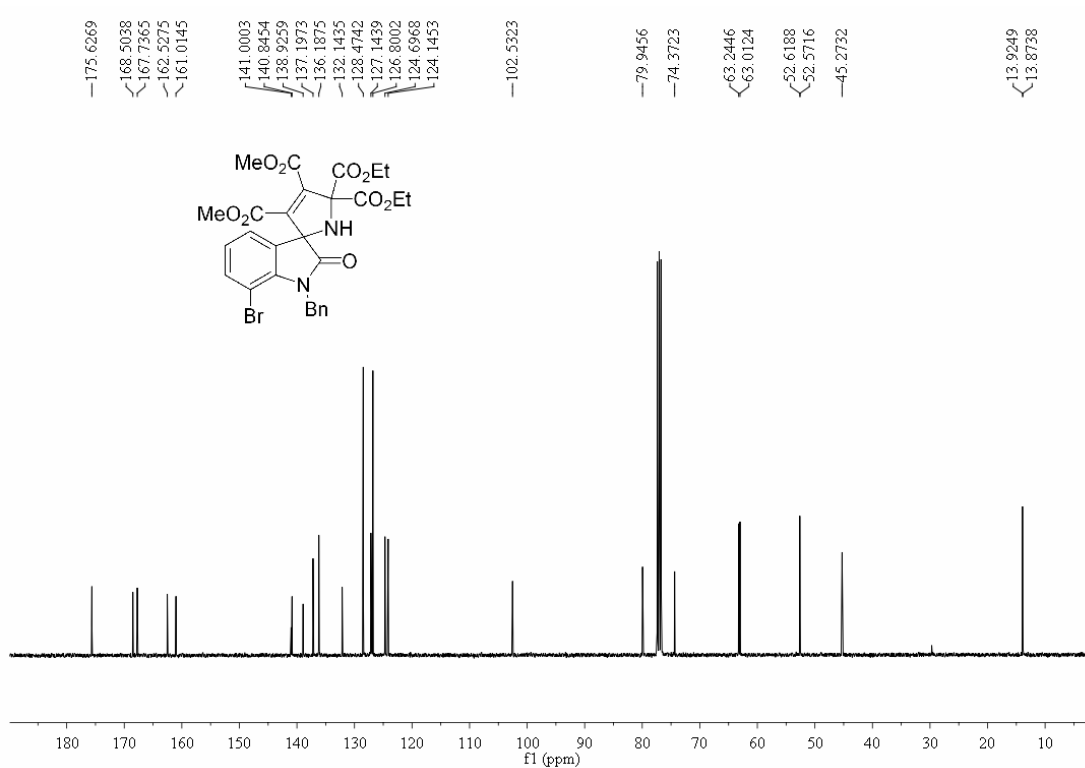

**4saa:**

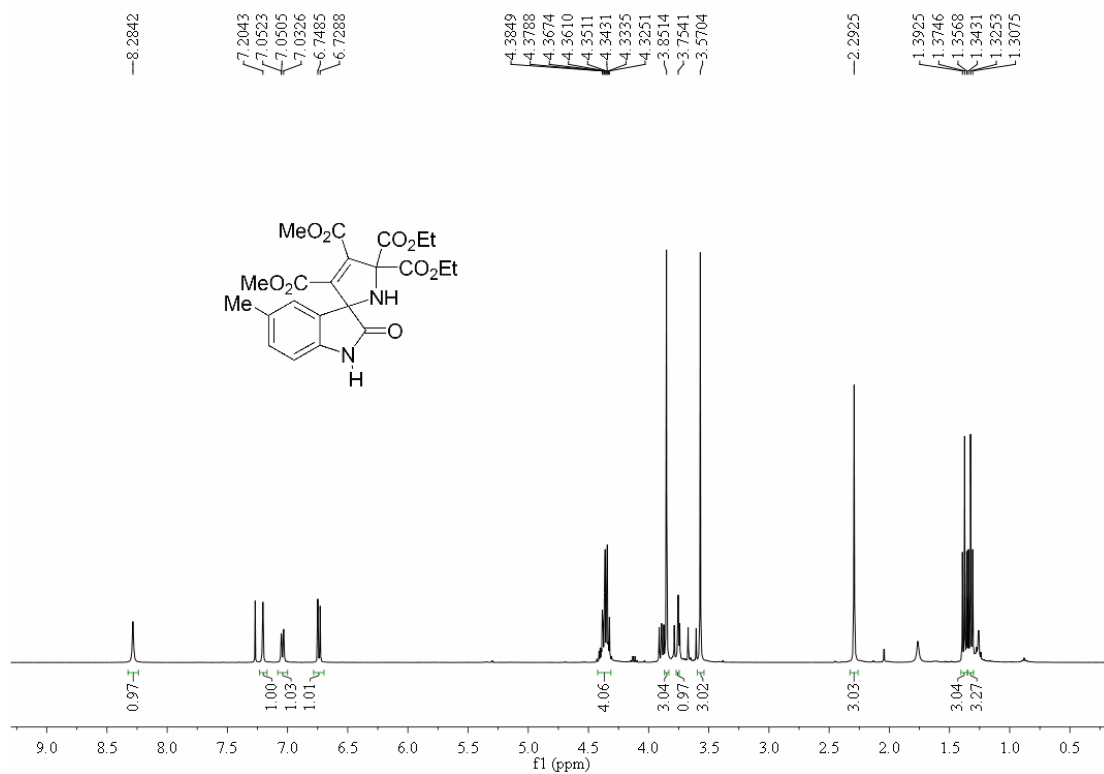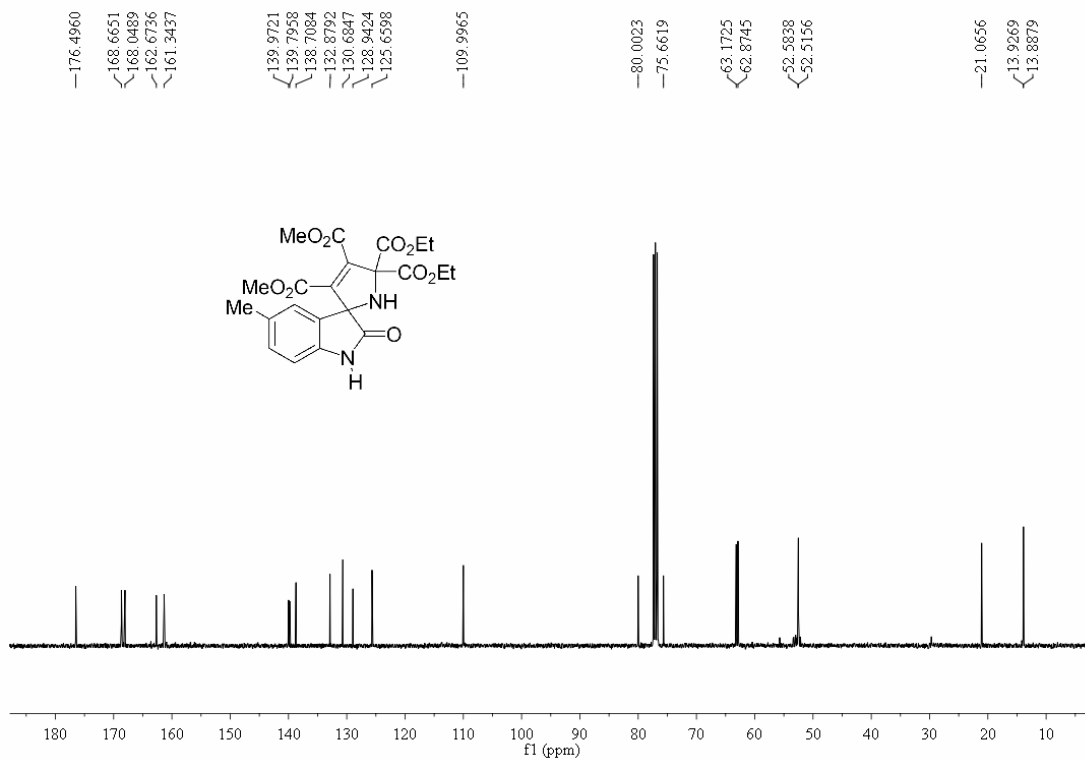

**4taa:**

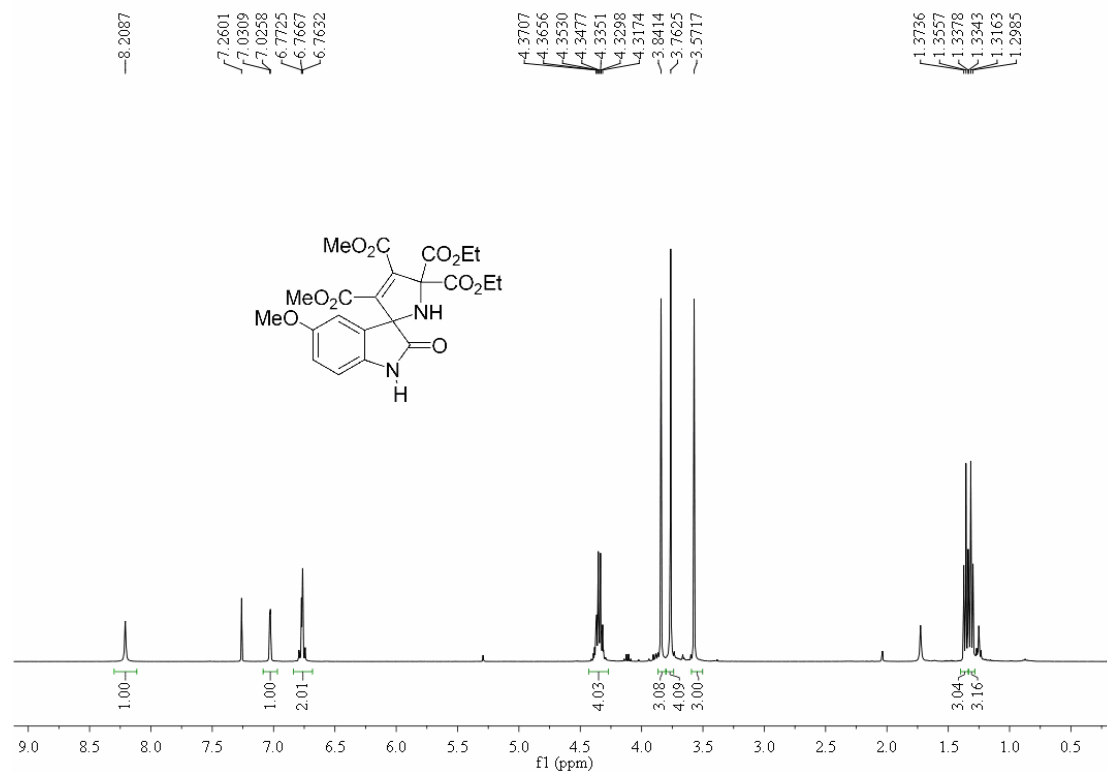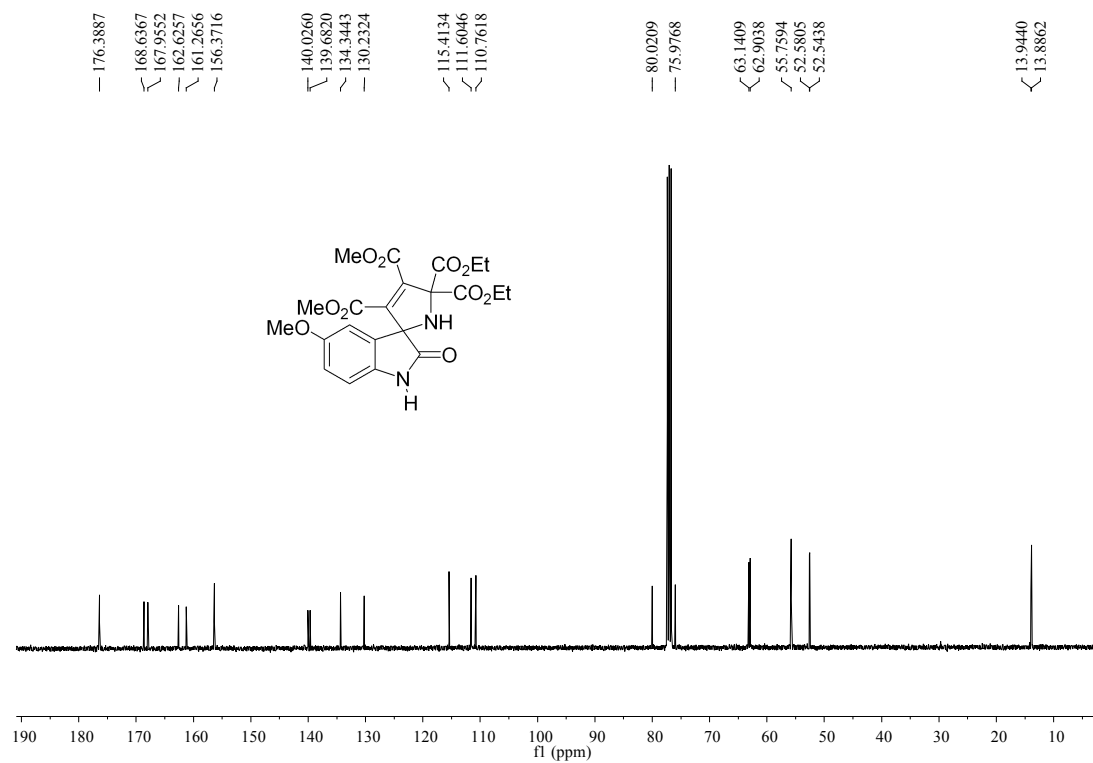

**4uaa:**

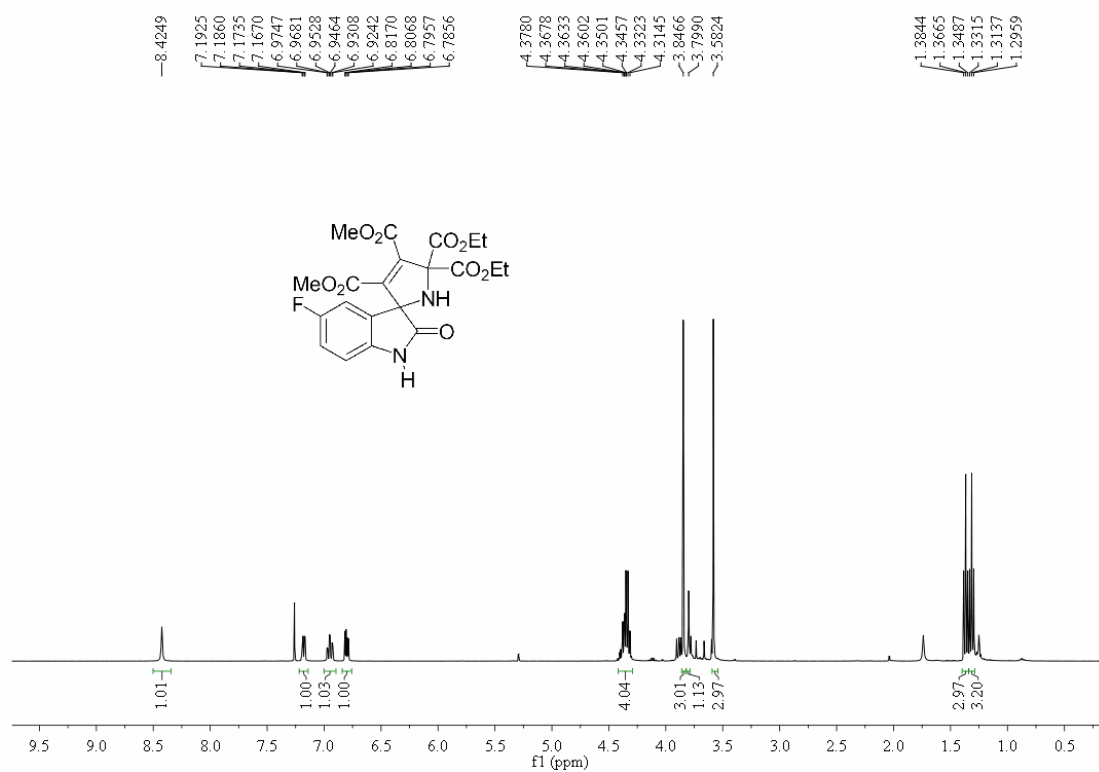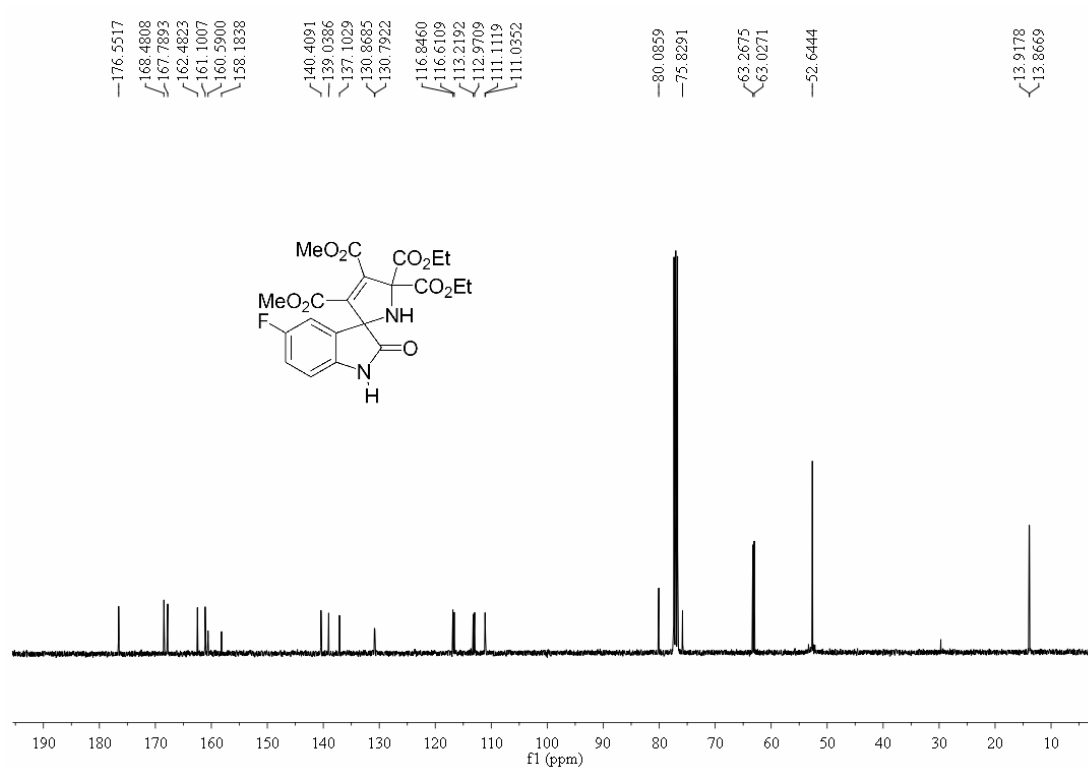

**4vaa:**

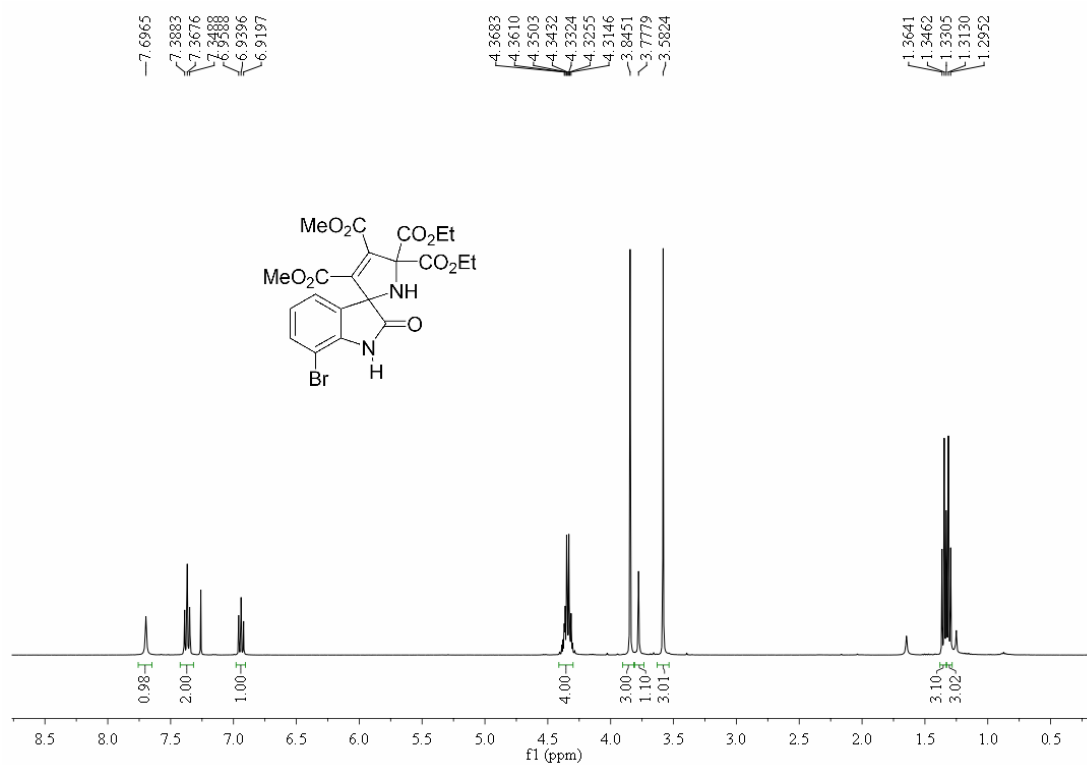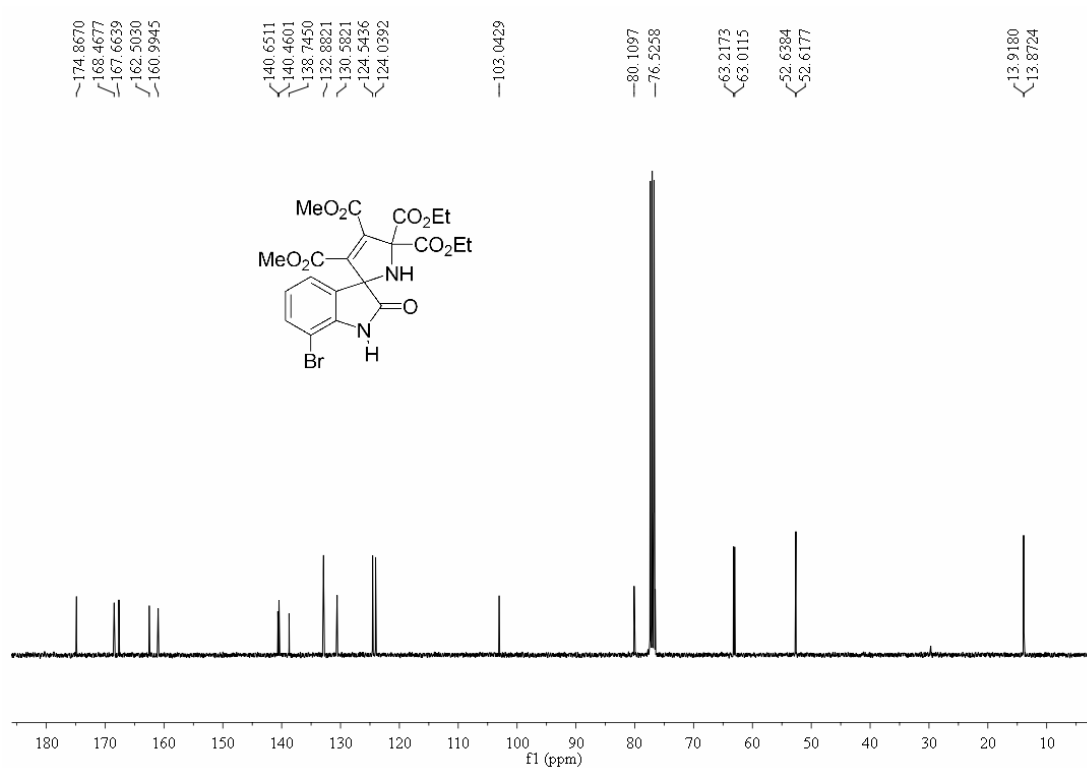

**4waa:**

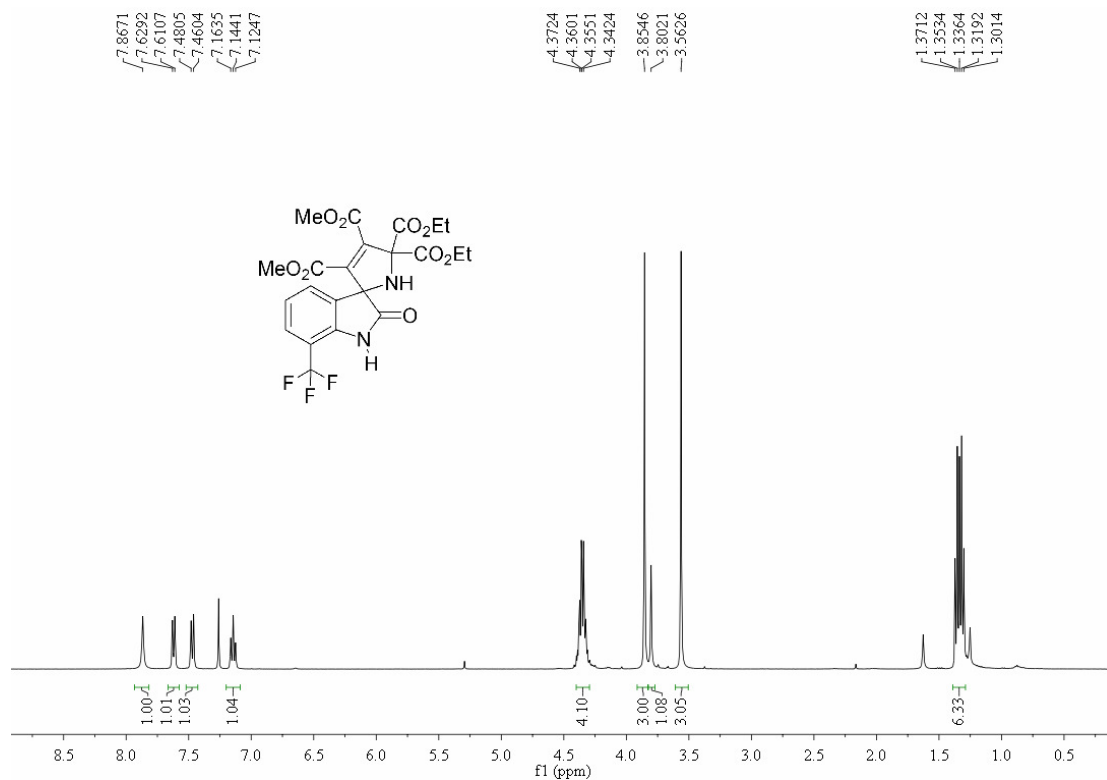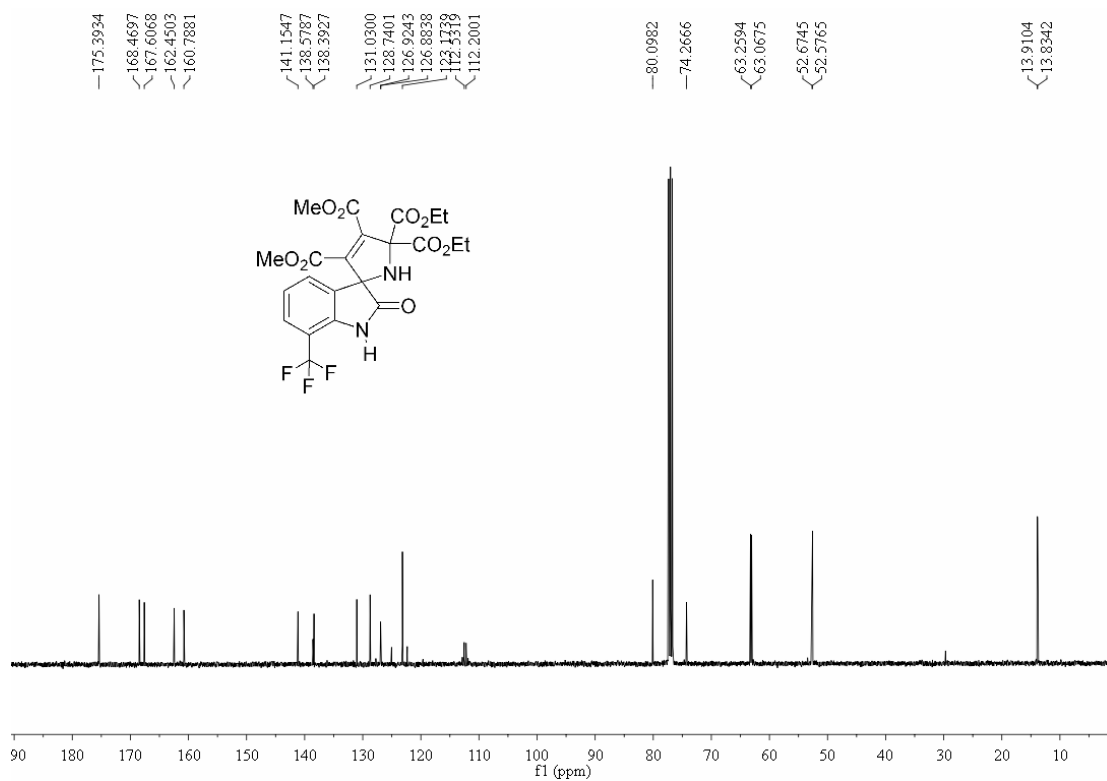

**4xaa:**

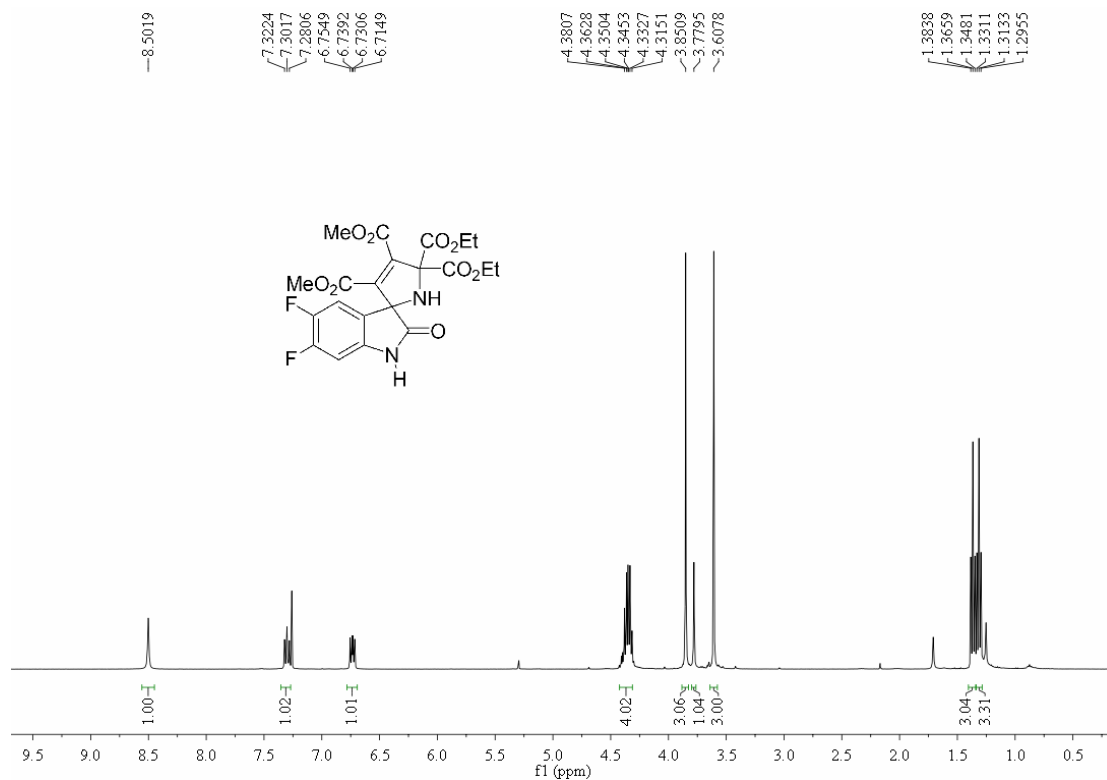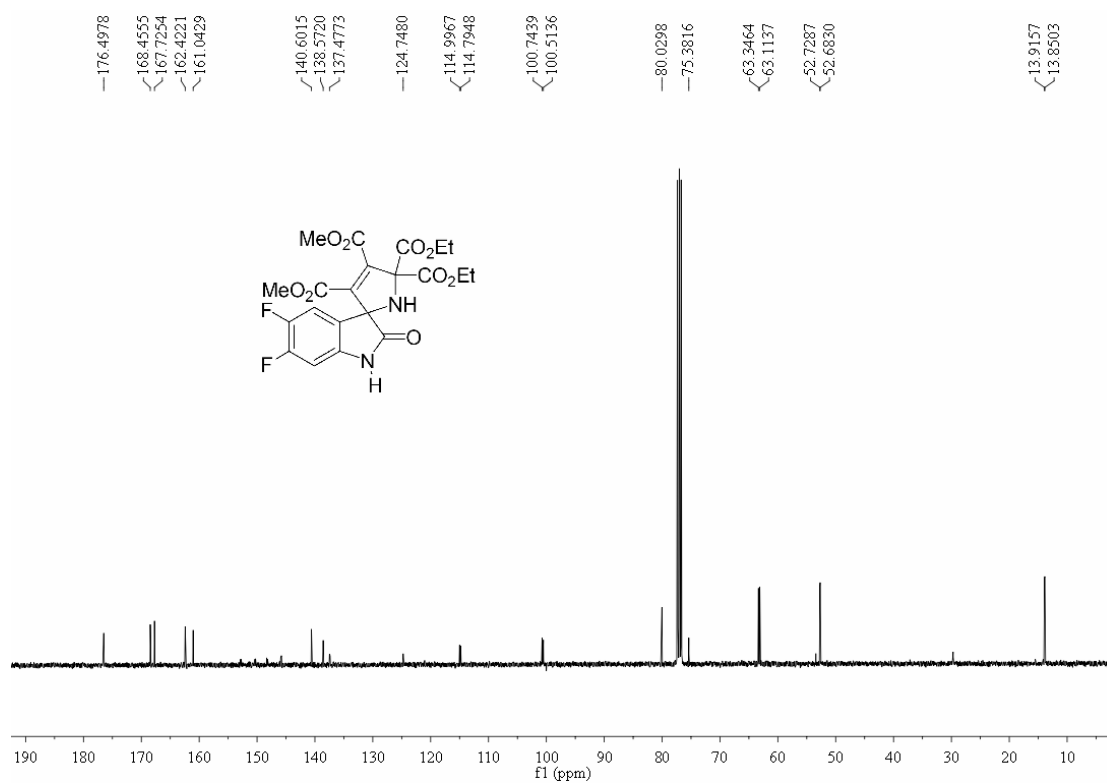



**4bab:**

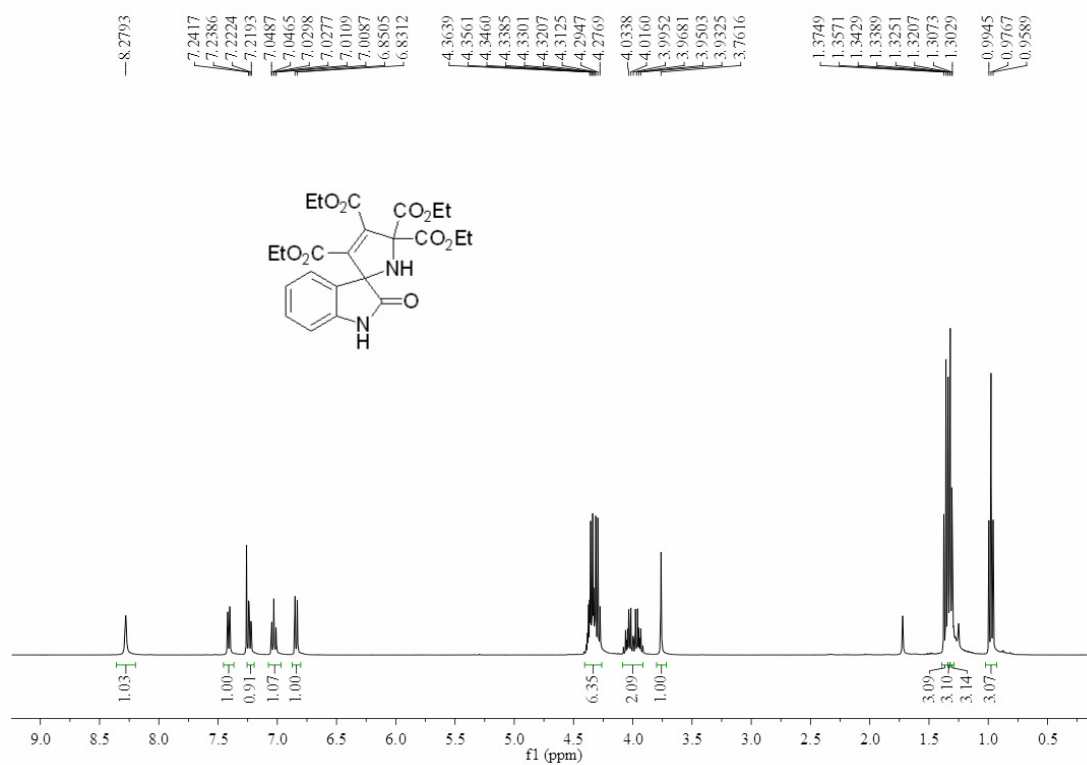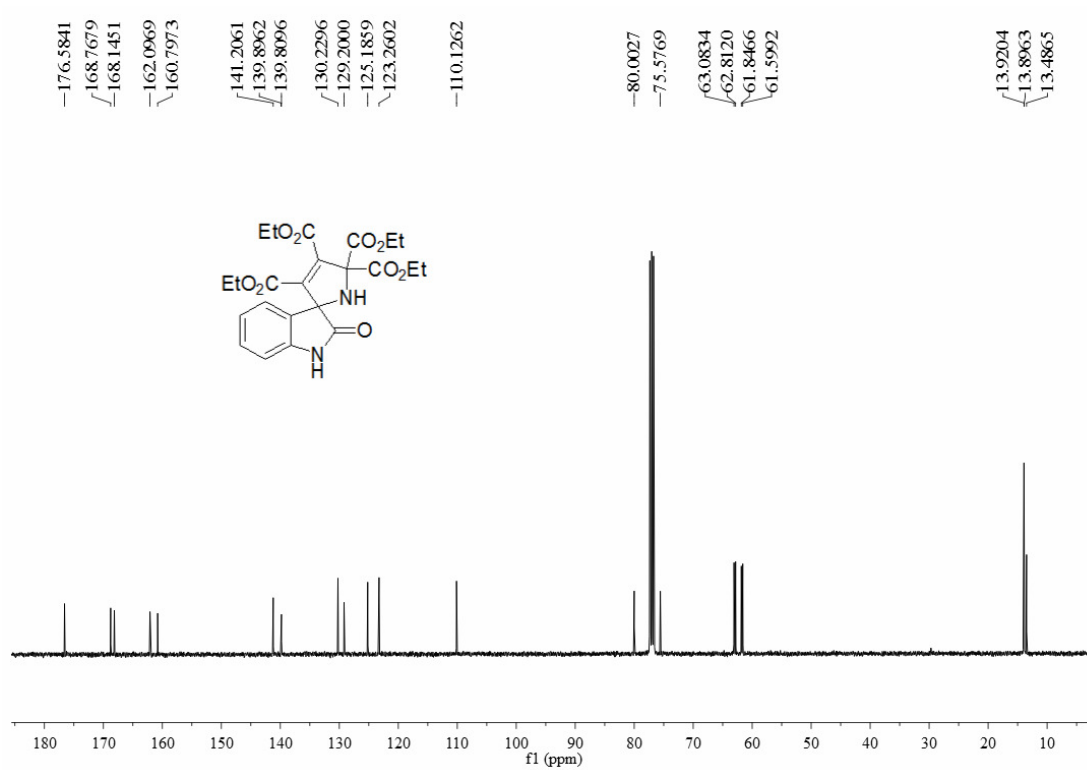

**4cab:**

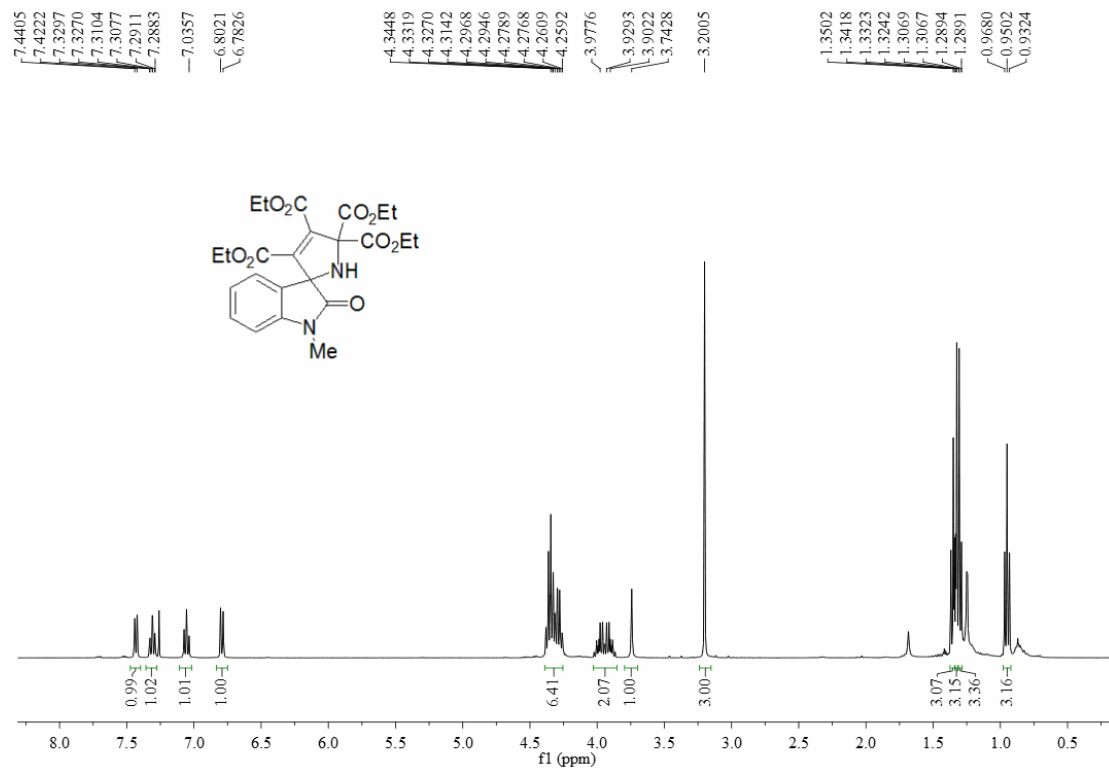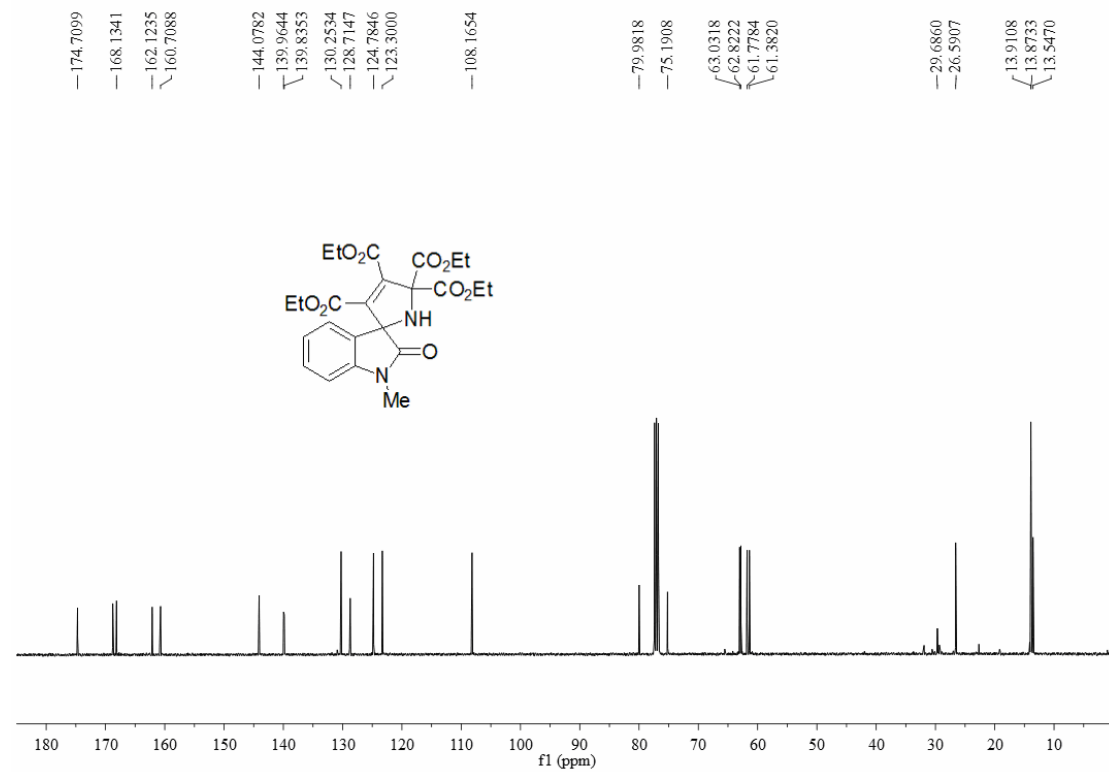

4eab:

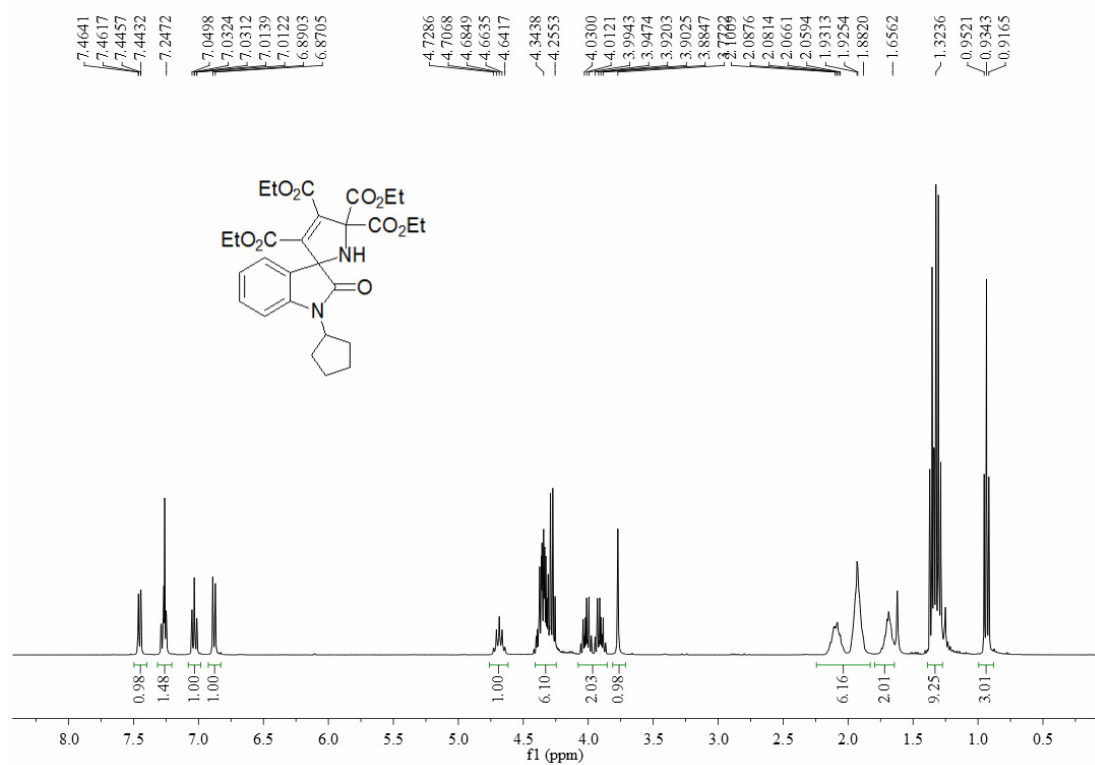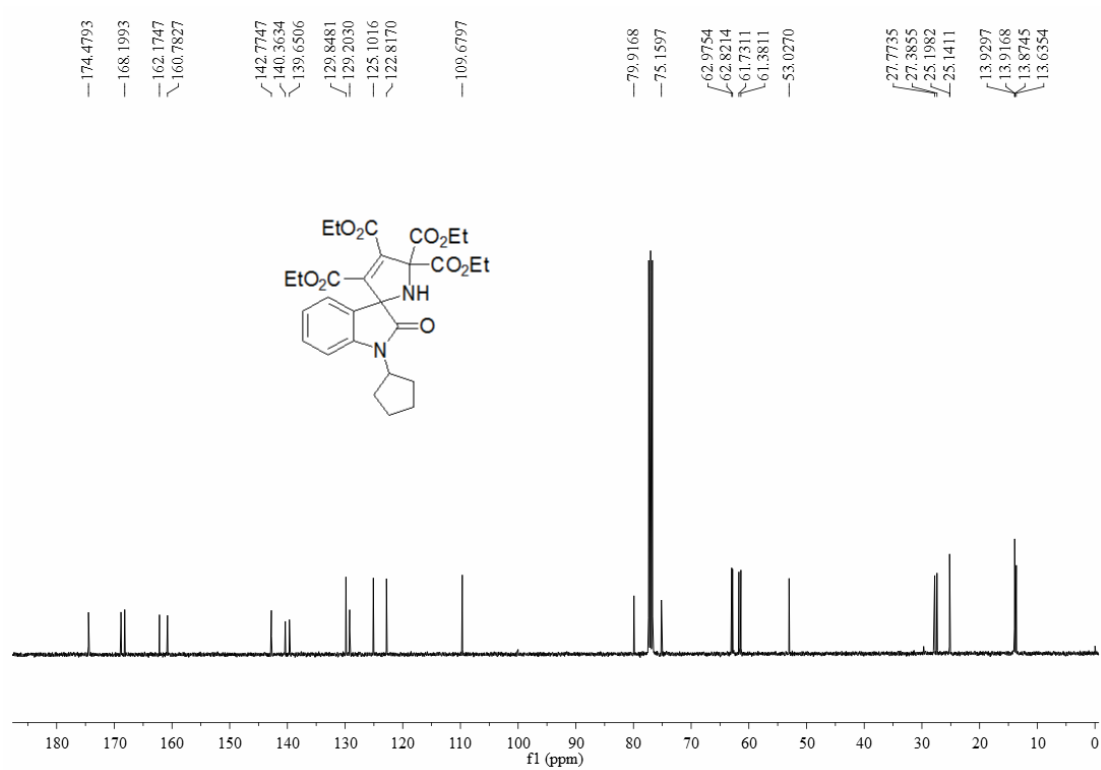

**4fab:**

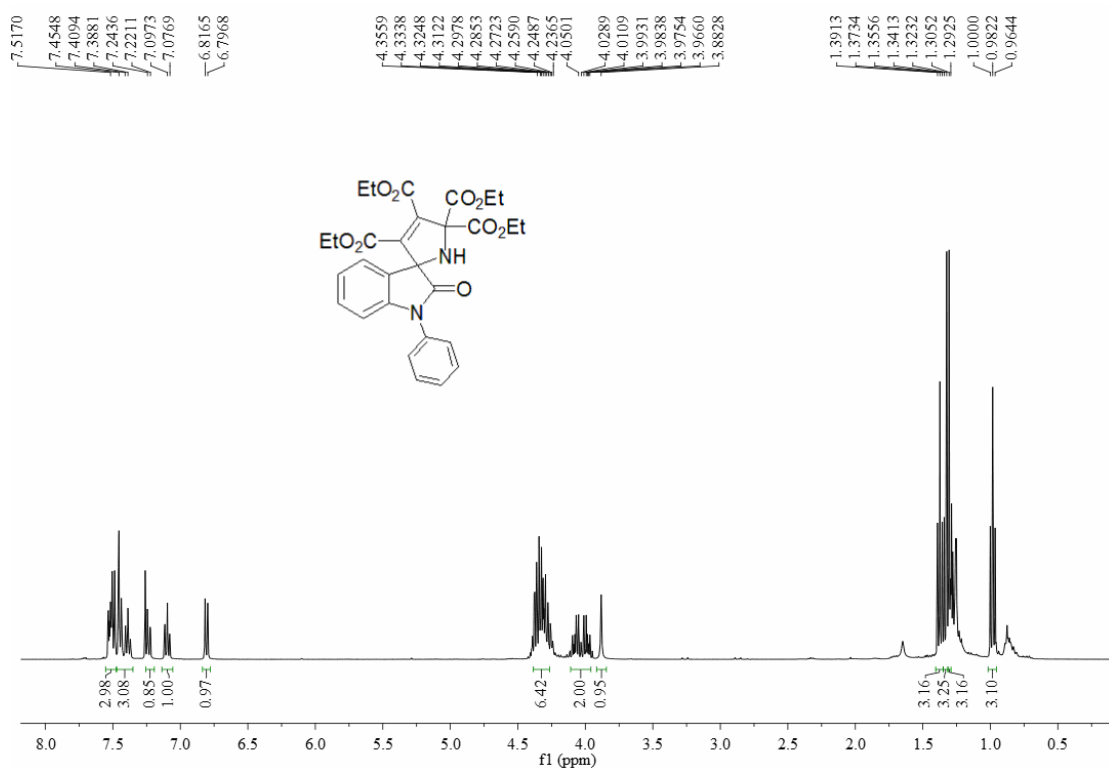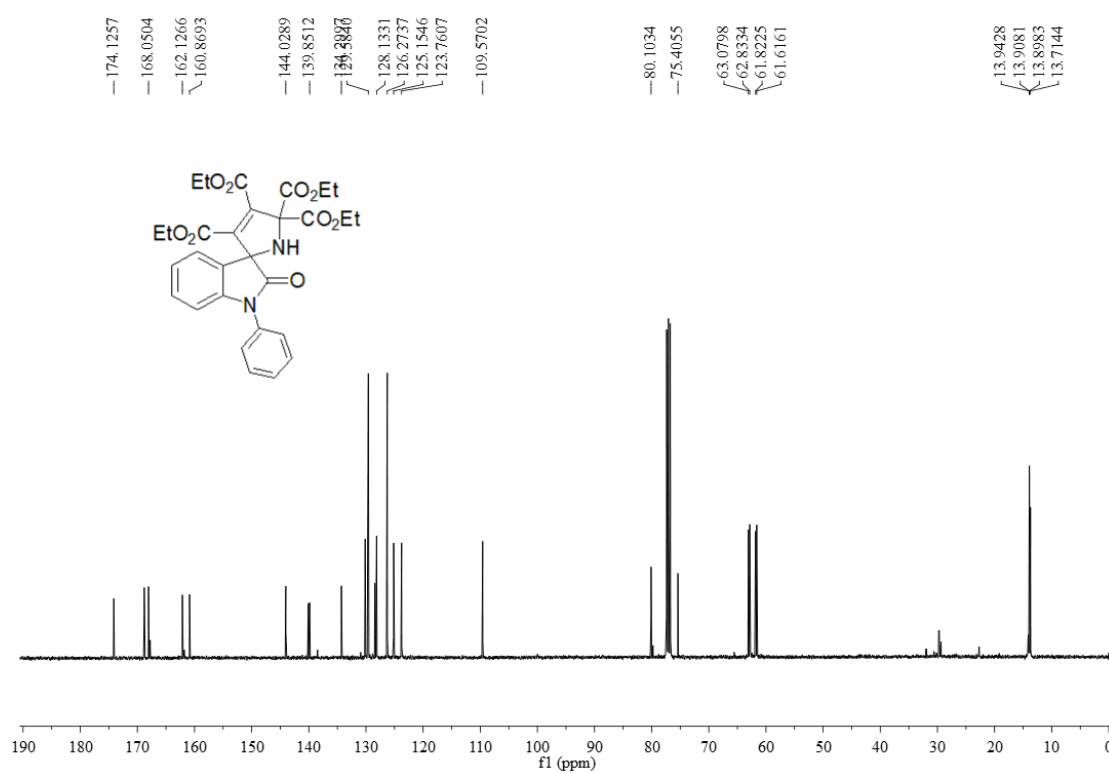

4aab:

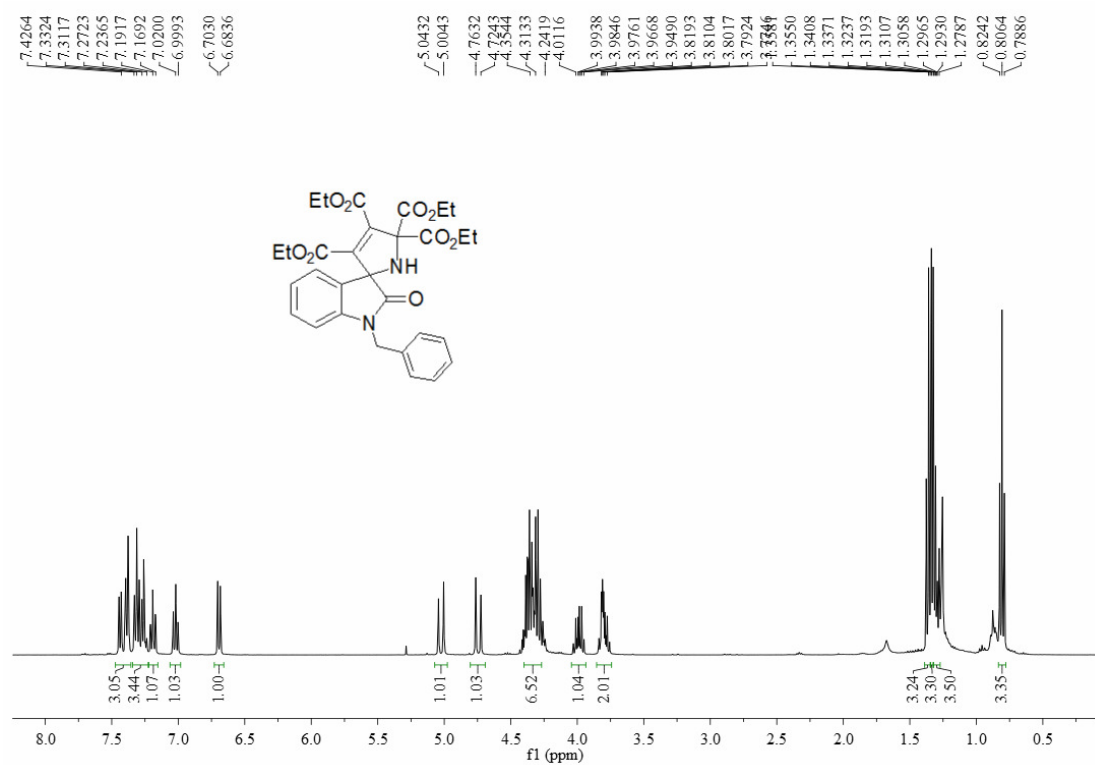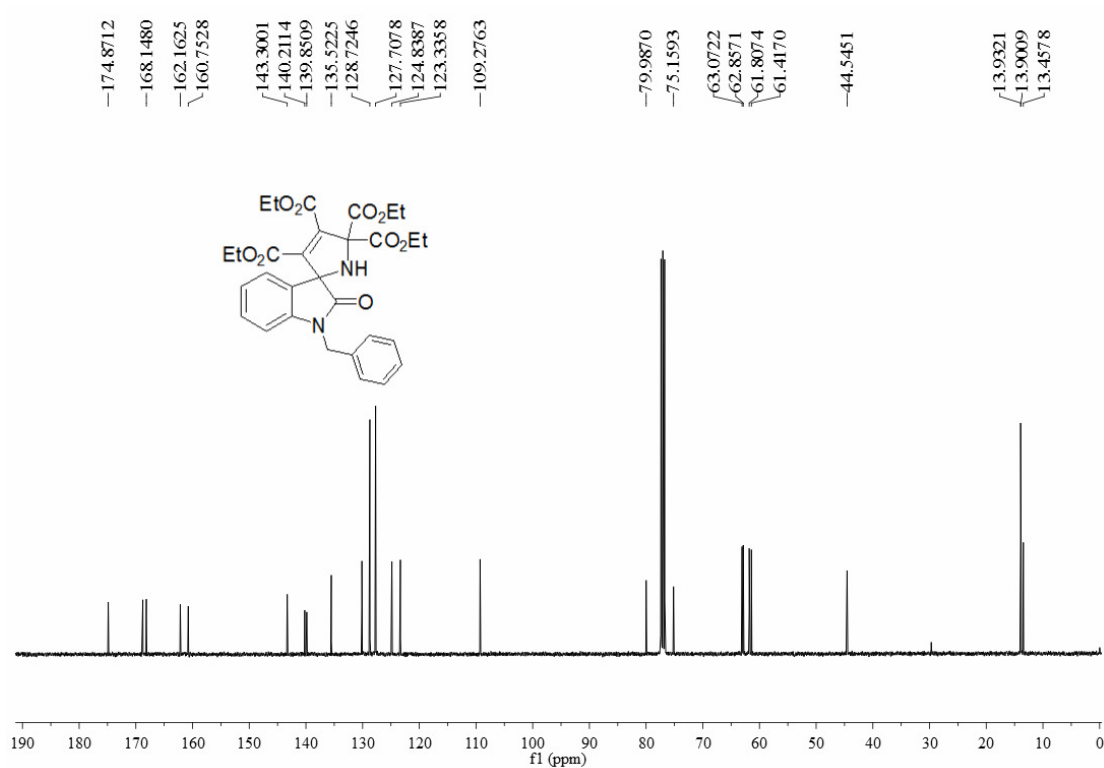

**4iab:**

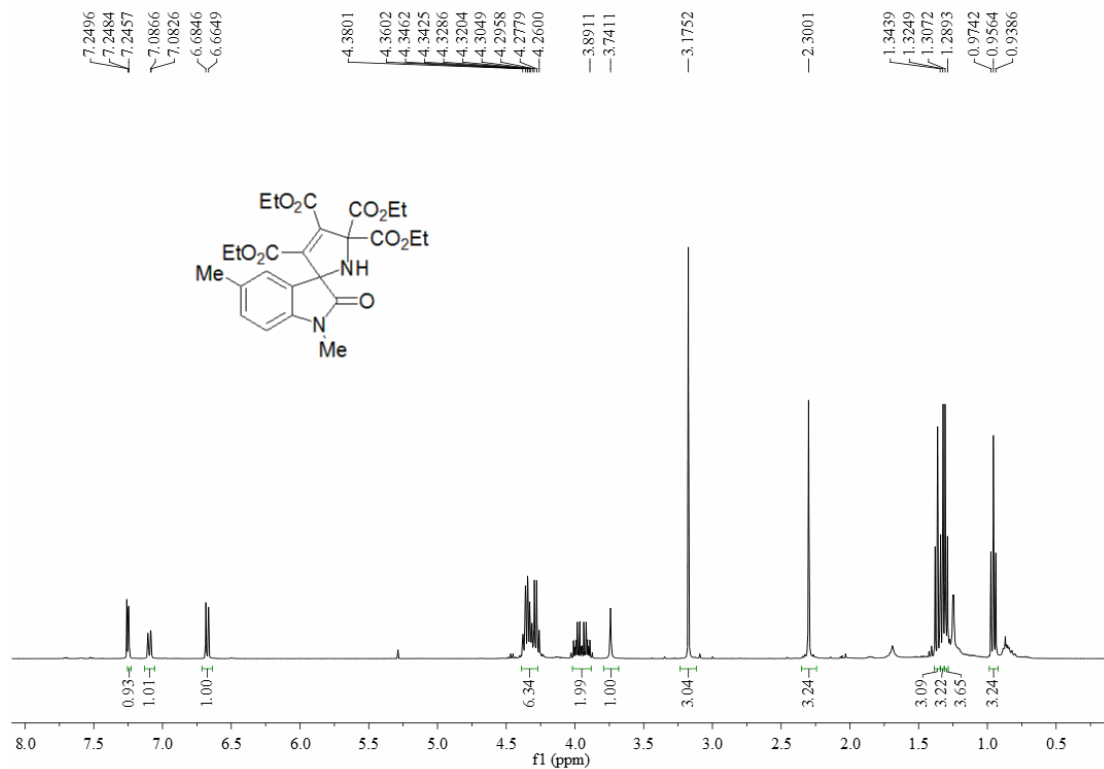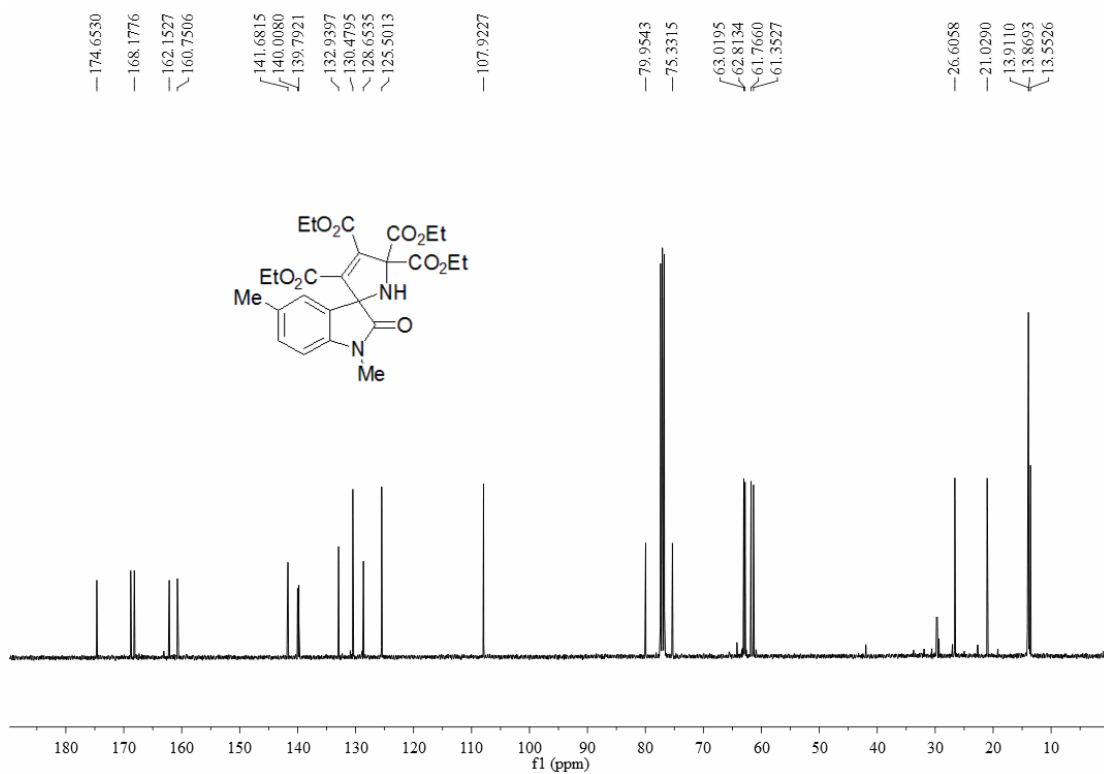

4jab:

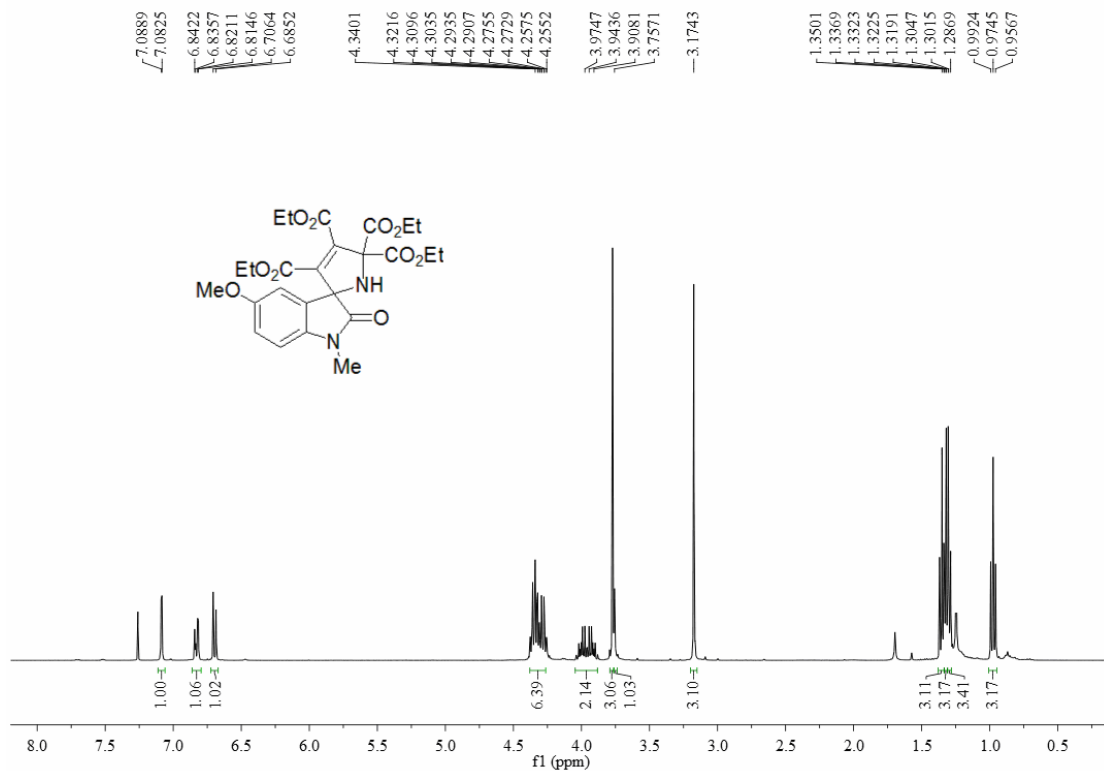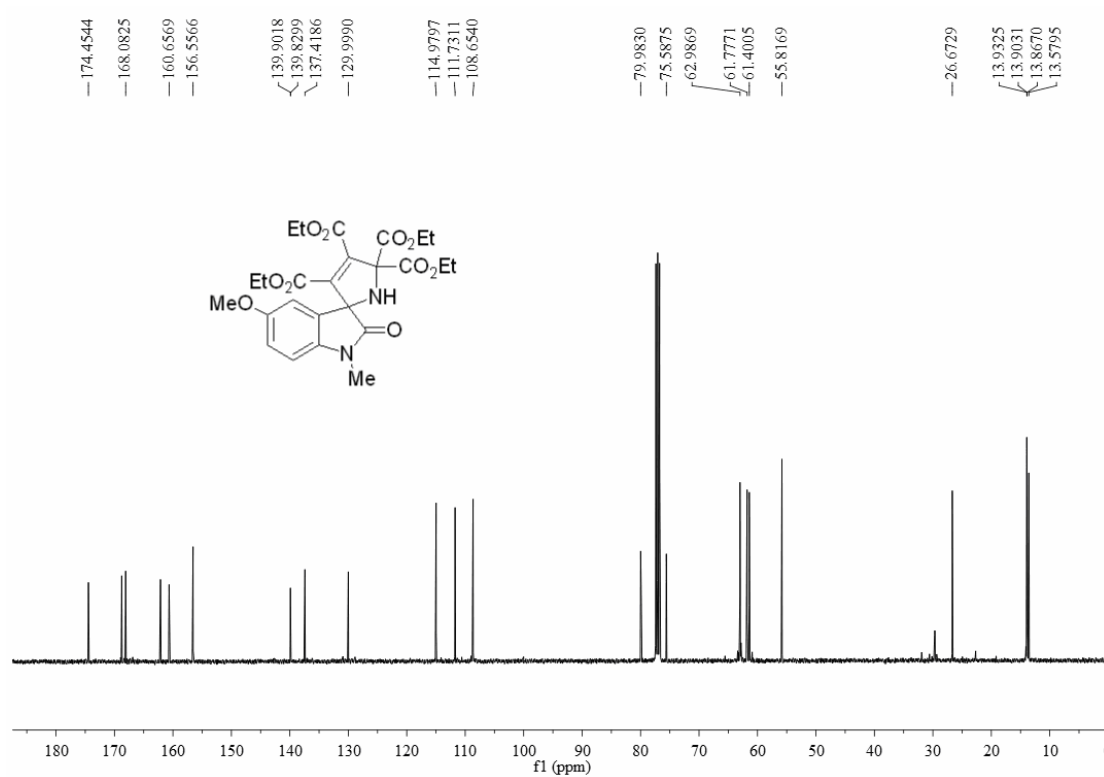

4kab:

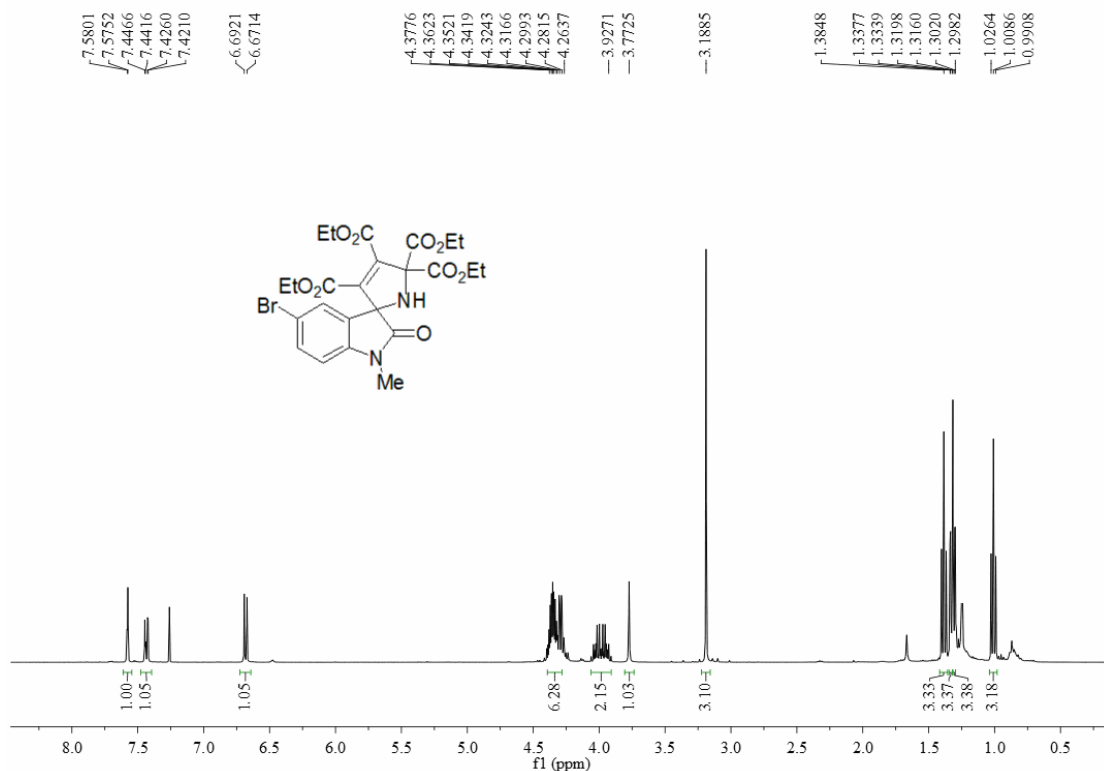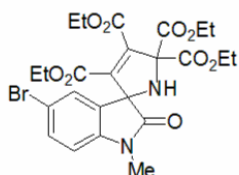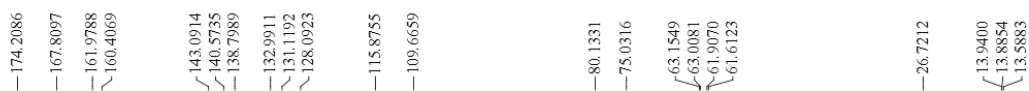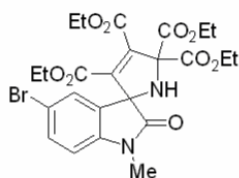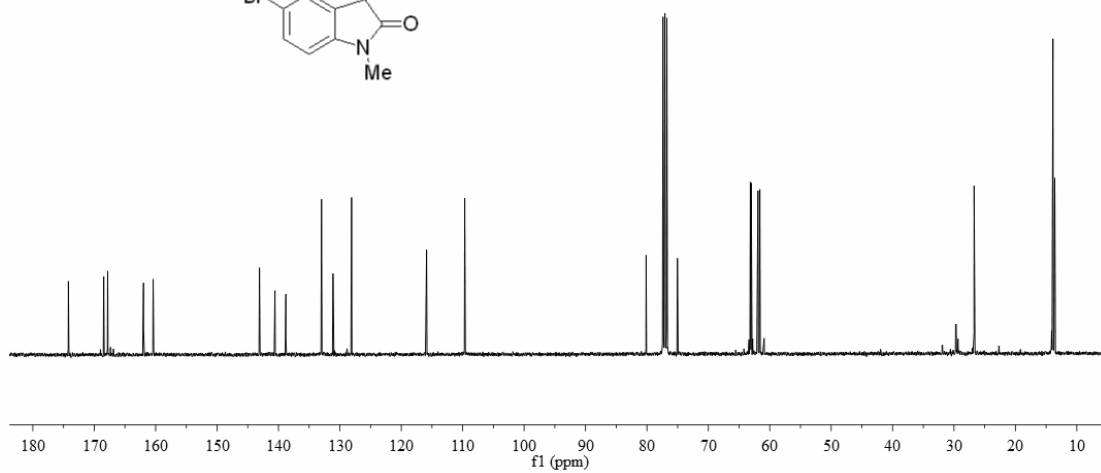



**4lab:**

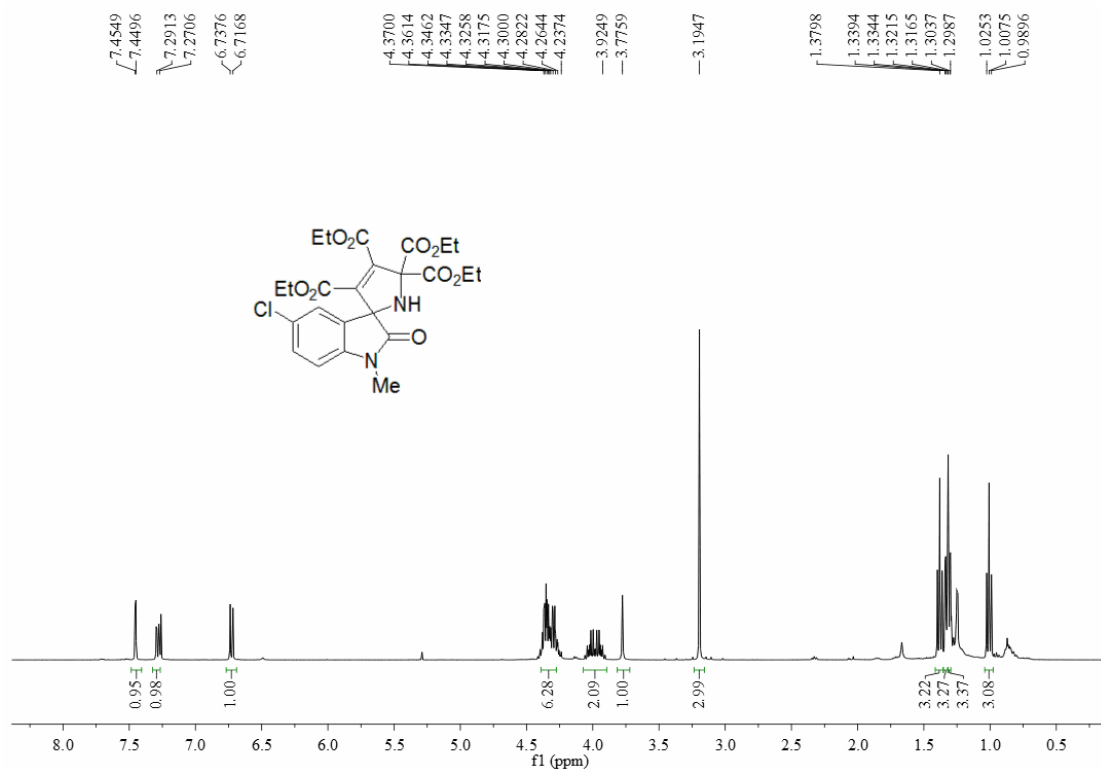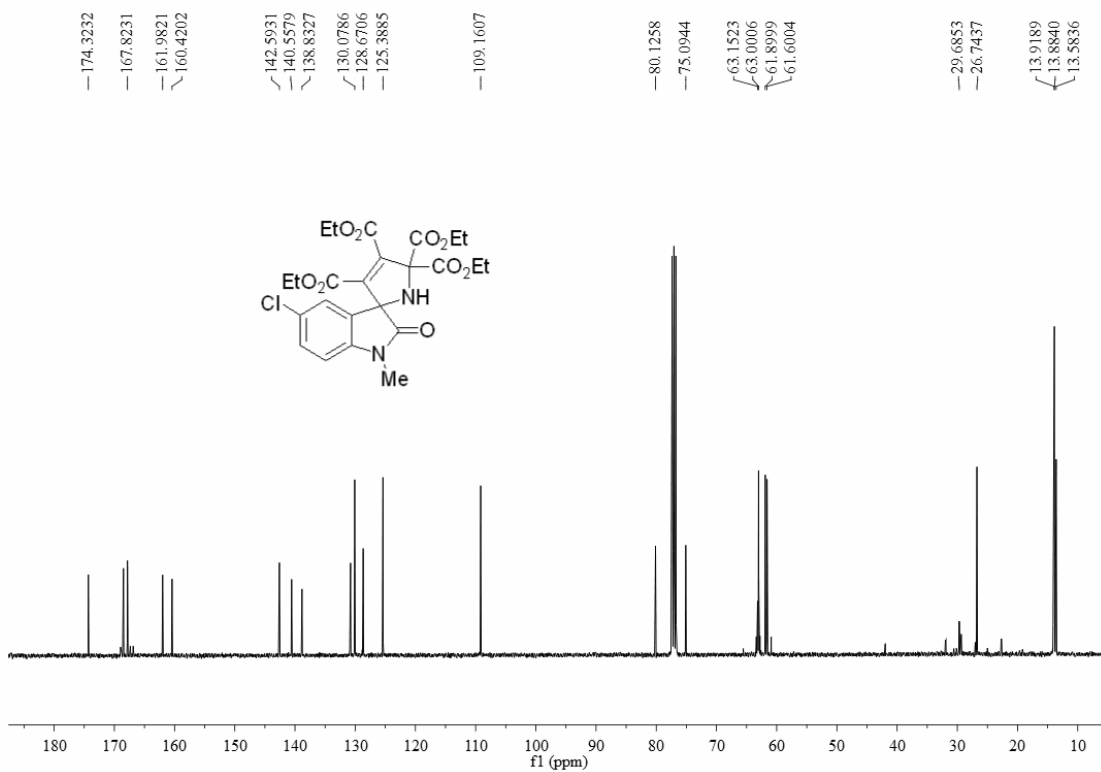

**4yab:**

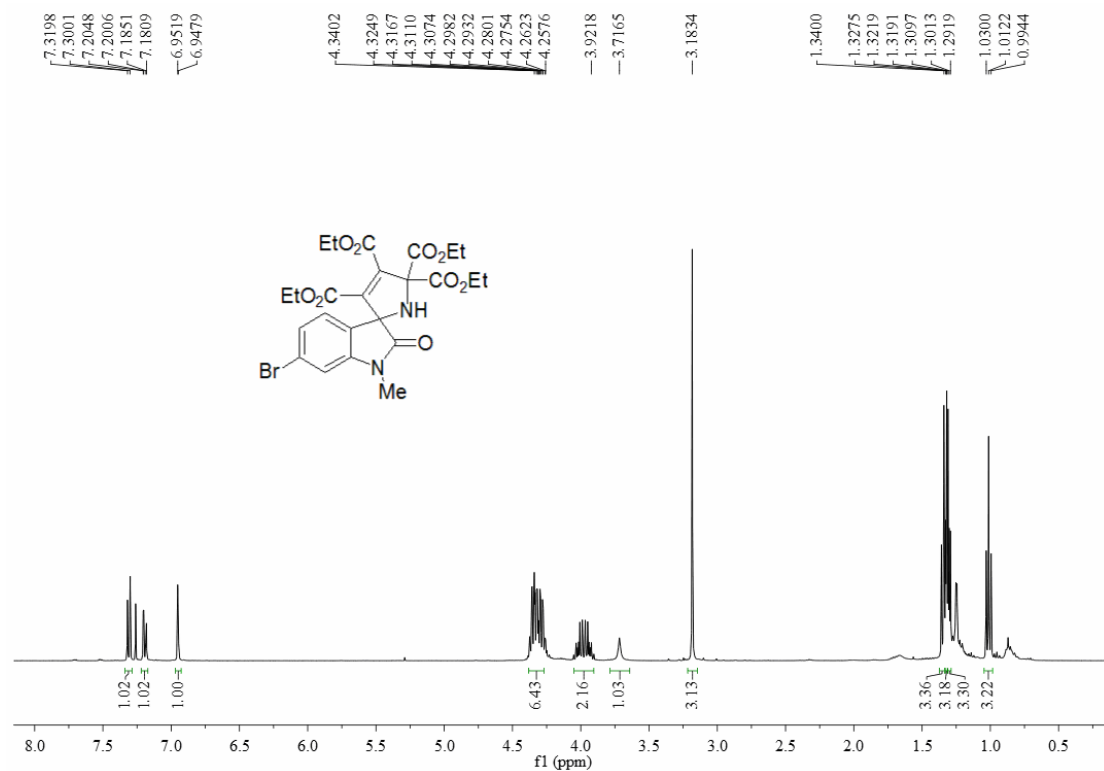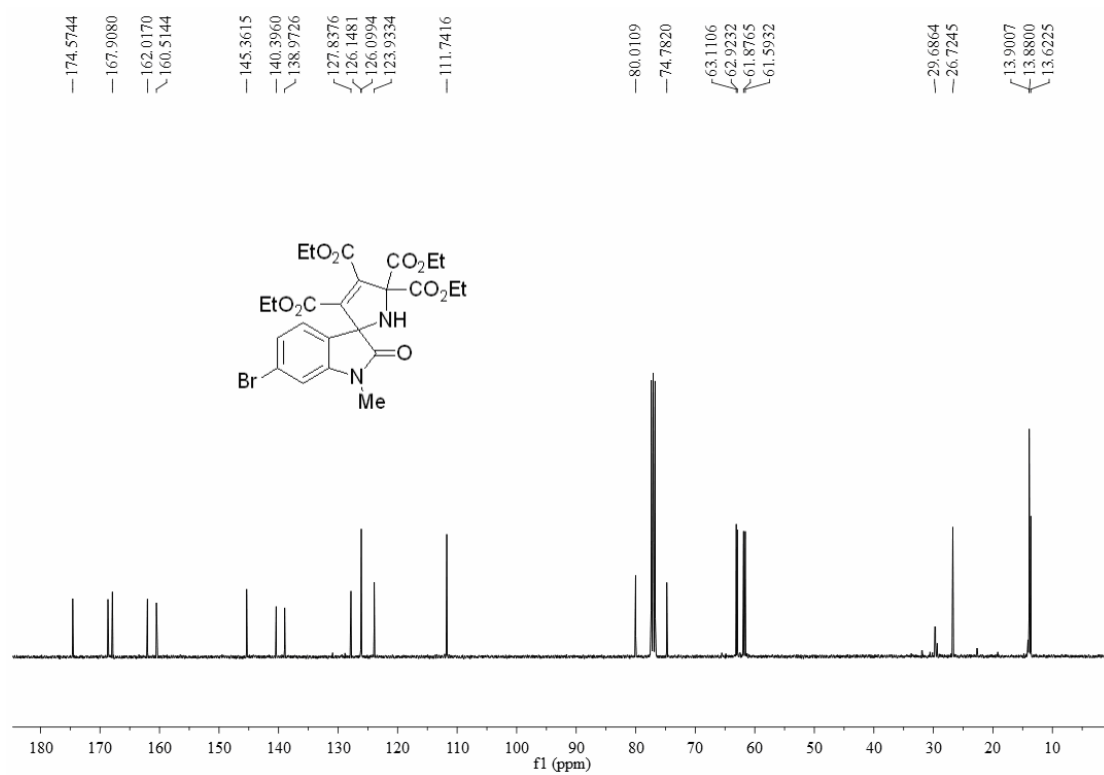

**4wab:**

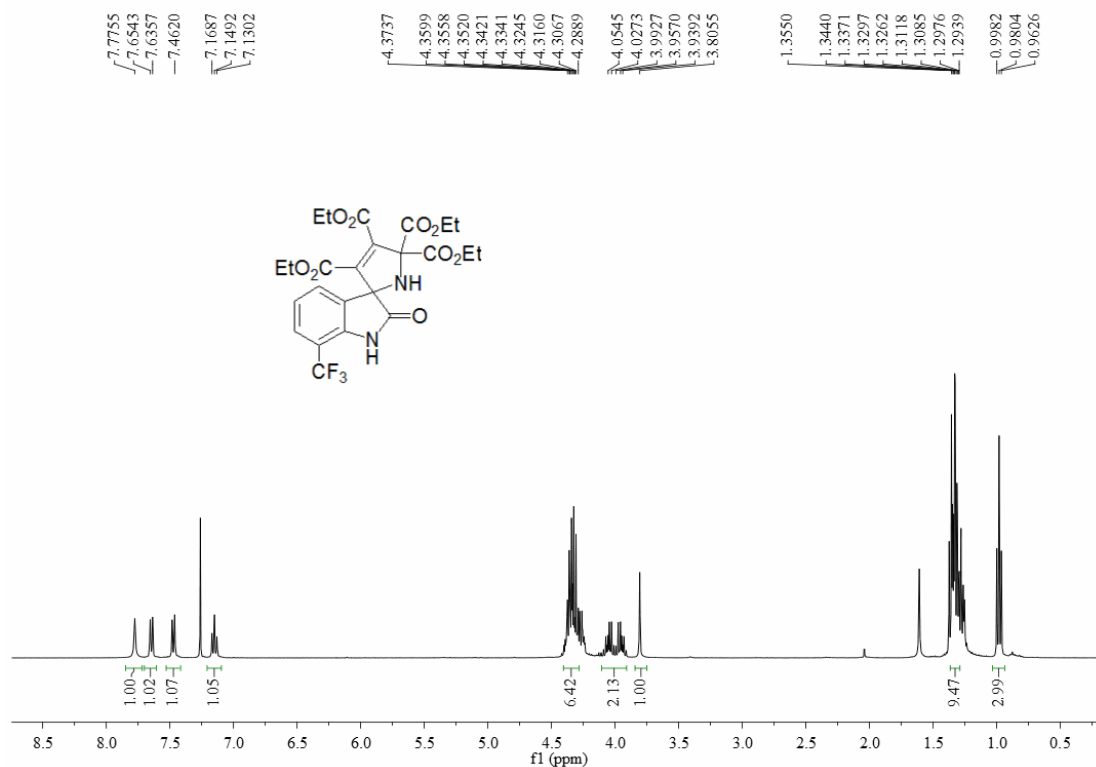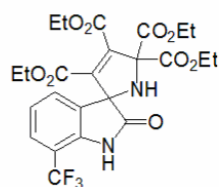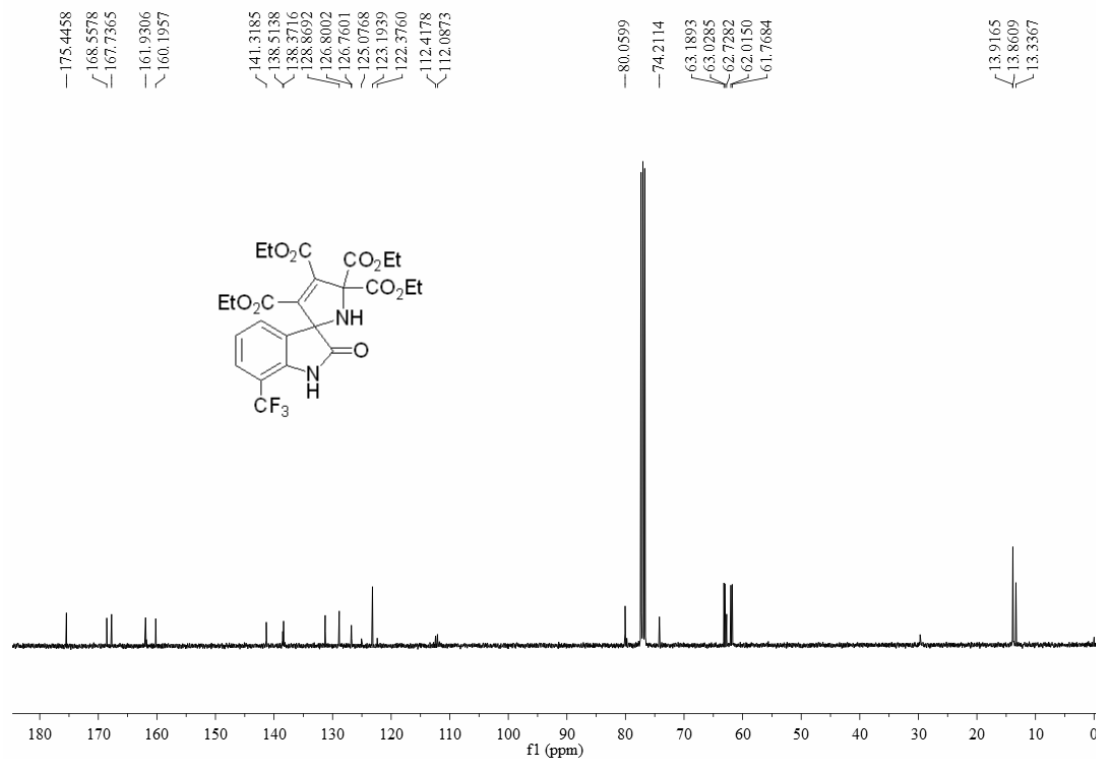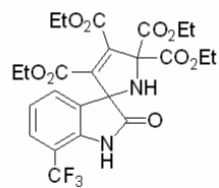

**4vab:**

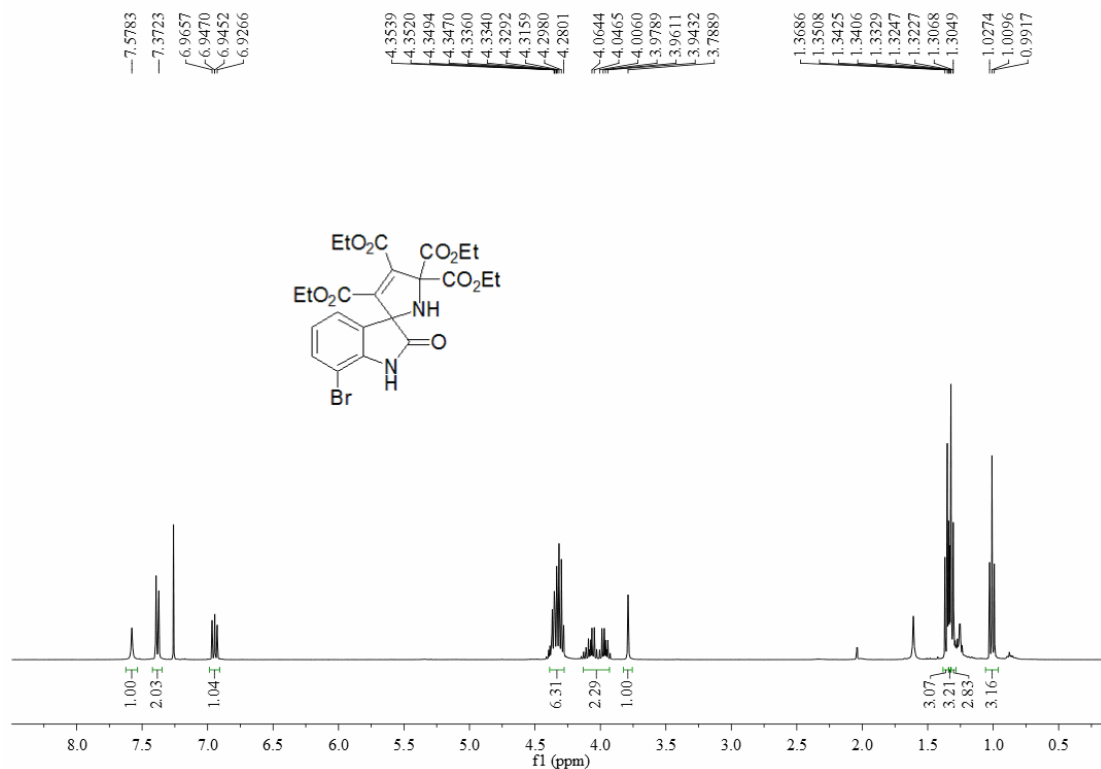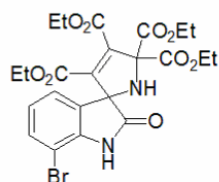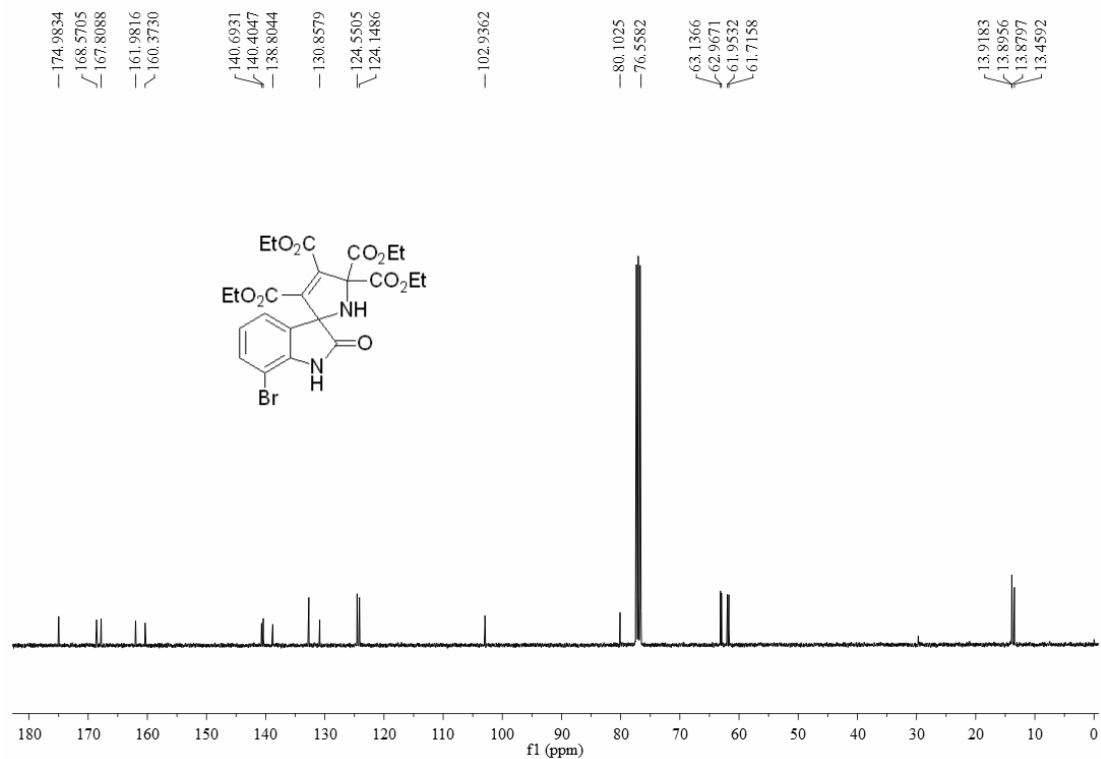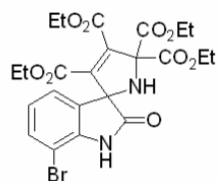

Supplement: c3ra40874d.pdf [file c3ra40874d.pdf]
